# Supplementary material for: An updated phylogeny of the Alphaproteobacteria reveals that the parasitic Rickettsiales and Holosporales have independent origins
Source: eLife journal article supplement (doi:10.7554/elife.42535), 2019-02-21
Supplement: supp [file elife-42535-supp-v2.zip]

Archive with 18 entries (18 files):
- elife_poa_e42535_Figure_3_figure_supplement_5.pdf
- elife_poa_e42535_Figure_3_figure_supplement_3.pdf
- elife_poa_e42535_Transparent_Reporting_File.pdf
- elife_poa_e42535_Figure_2_figure_supplement_3.pdf
- elife_poa_e42535_Figure_2_figure_supplement_5.pdf
- elife_poa_e42535_Supplementary_file_1.pdf
- elife_poa_e42535_Figure_2_figure_supplement_6.pdf
- elife_poa_e42535_Figure_2_figure_supplement_4.pdf
- elife_poa_e42535_Supplementary_File_2.docx
- elife_poa_e42535_Figure_3_figure_supplement_6.pdf
- elife_poa_e42535_Figure_3_figure_supplement_8.pdf
- elife_poa_e42535_Figure_2_figure_supplement_2.pdf
- elife_poa_e42535_Figure_2_figure_supplement_1.pdf
- elife_poa_e42535_Figure_2_figure_supplement_7.pdf
- elife_poa_e42535_Figure_3_figure_supplement_2.pdf
- elife_poa_e42535_Figure_3_figure_supplement_7.pdf
- elife_poa_e42535_Figure_3_figure_supplement_4.pdf
- elife_poa_e42535_Figure_3_figure_supplement_1.pdf
