# Supplementary material for: An updated phylogeny of the Alphaproteobacteria reveals that the parasitic Rickettsiales and Holosporales have independent origins
Source: eLife journal article supplement (doi:10.7554/elife.42535), 2019-02-21
Supplement: supp [file elife-42535-supp-v3.zip]

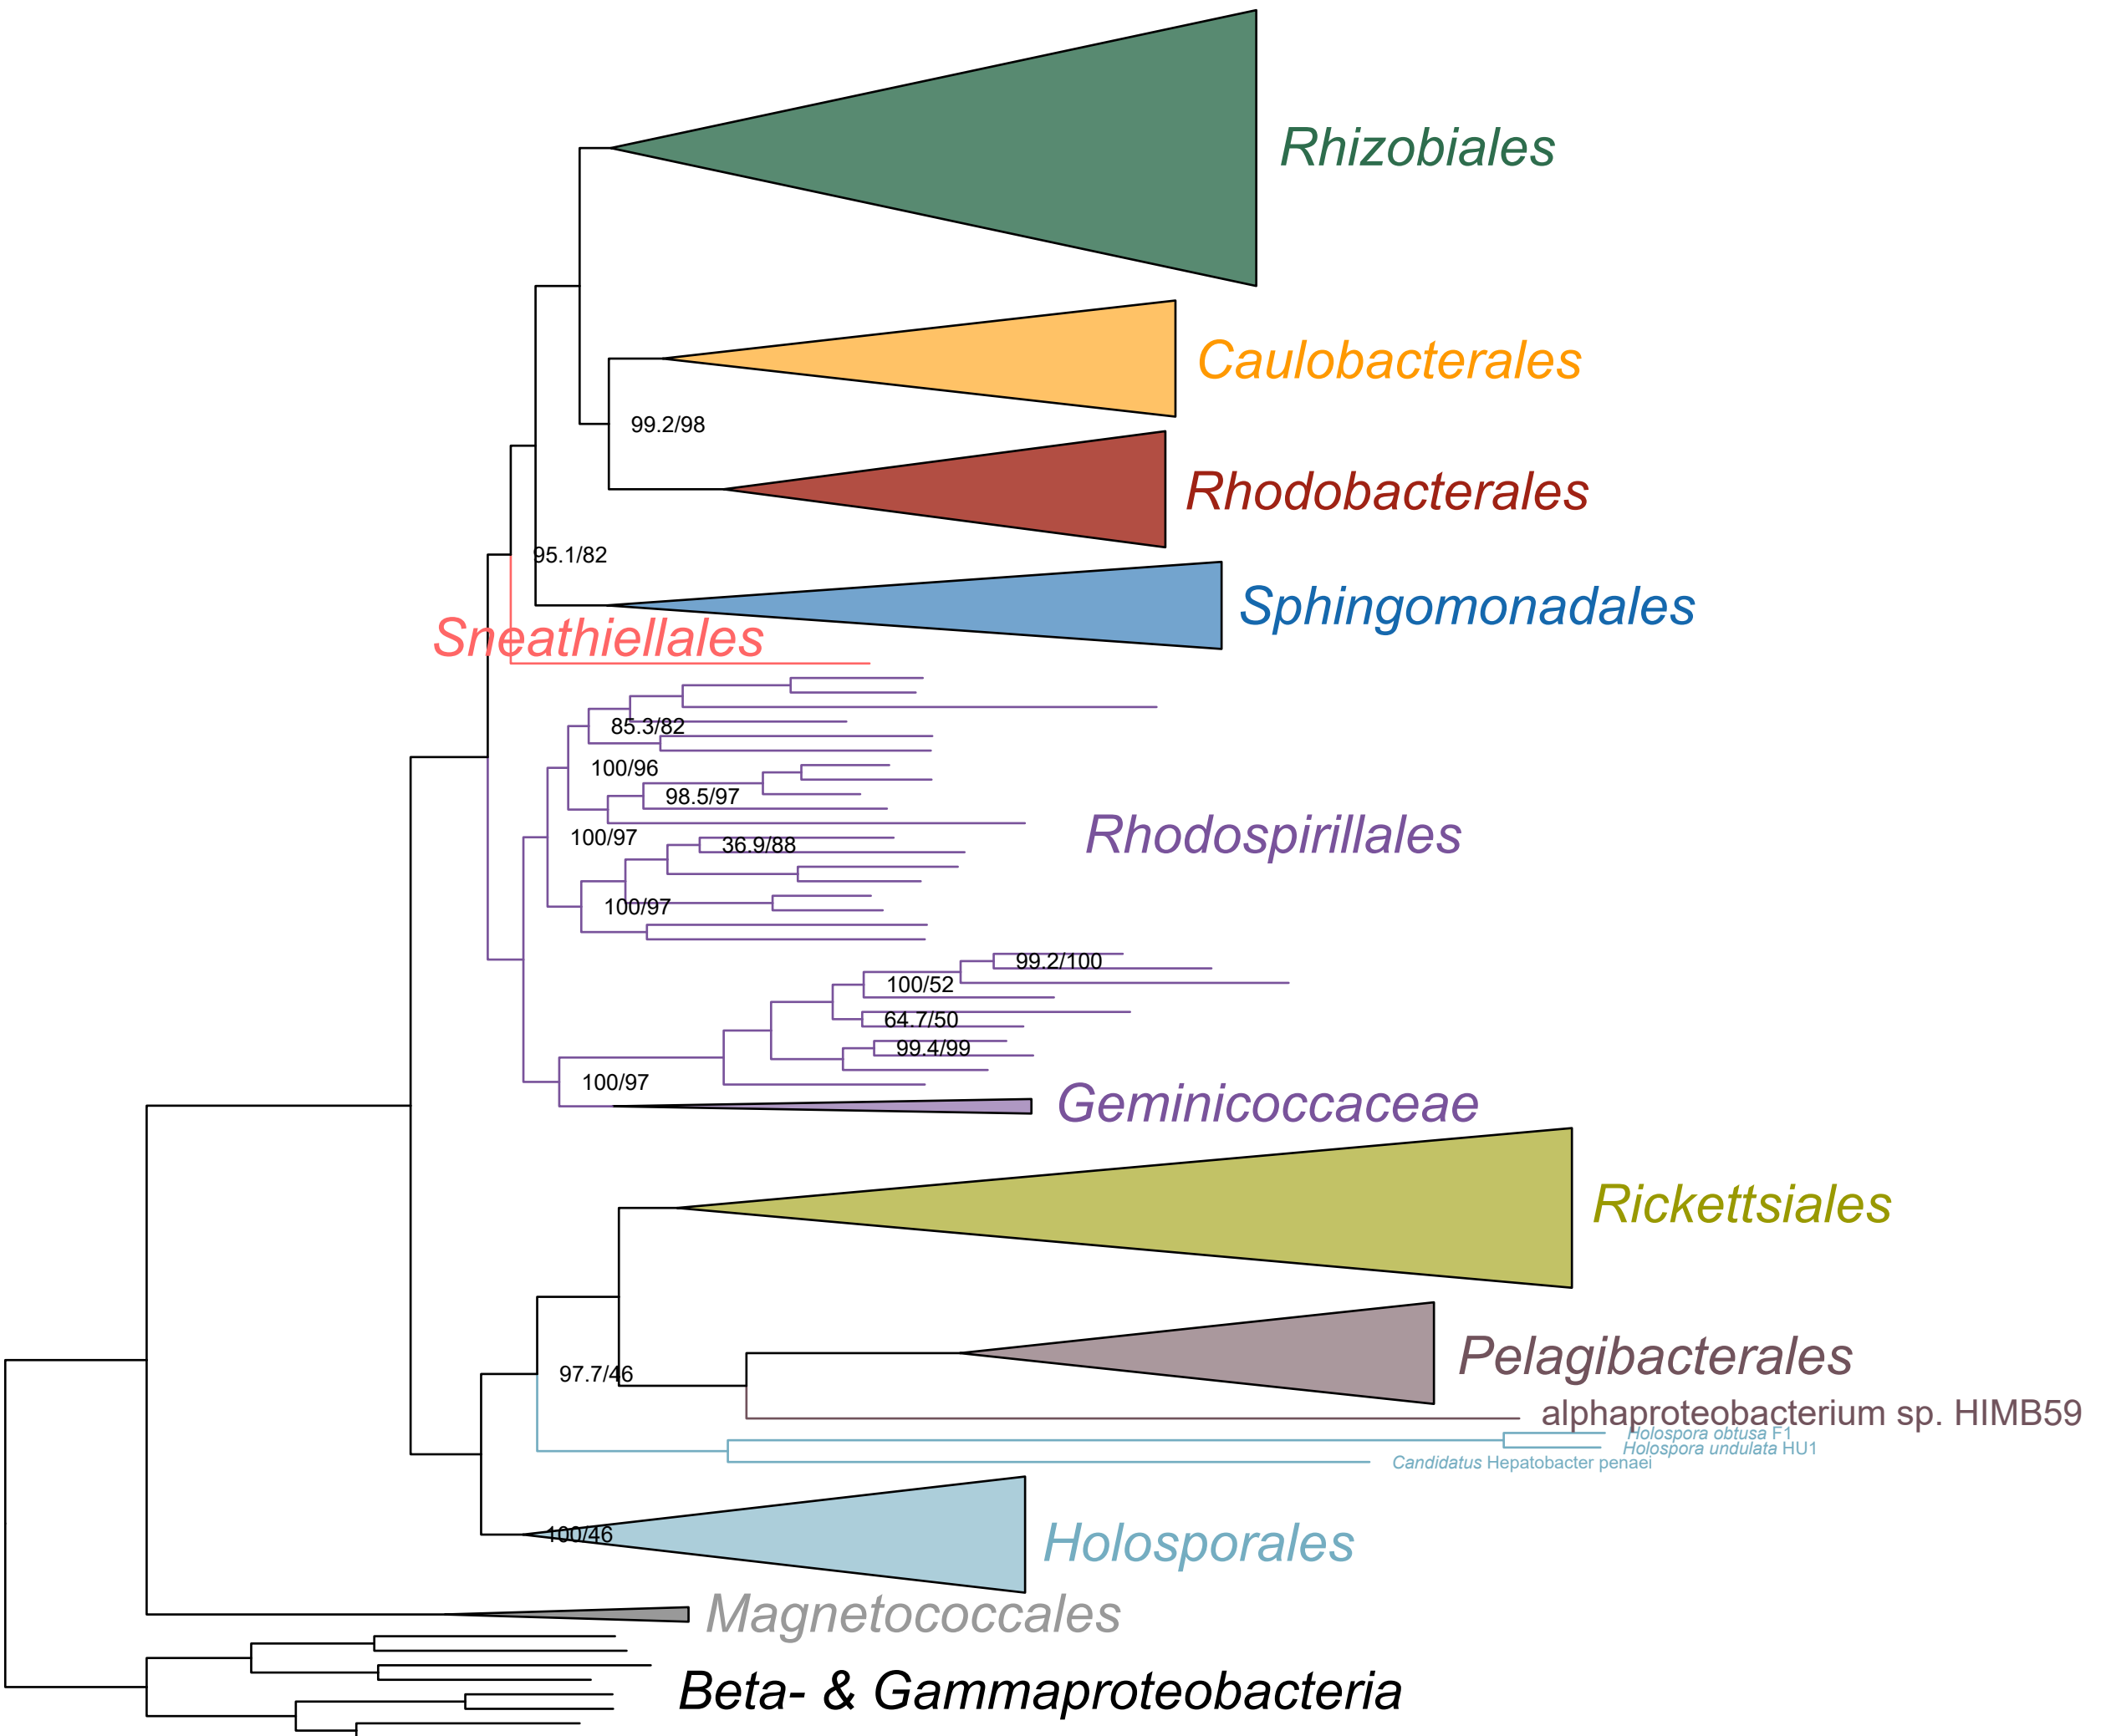

*Rhizobiales*

*Caulobacterales*

*Rhodobacterales*

*Sphingomonadales*

*Sneathiellales*

*Rhodospirillales*

*Geminicoccaceae*

*Rickettsiales*

*Pelagibacterales*

*Holosporales*

*Magnetococcales*

*Beta- & Gammaproteobacteria*

*alphaproteobacterium* sp. HIMB59

*Holospira obtusa* F1  
*Holospira undulata* HU1

*Candidatus Hepatobacter penaei*
