# Supplementary material for: An updated phylogeny of the Alphaproteobacteria reveals that the parasitic Rickettsiales and Holosporales have independent origins
Source: eLife journal article supplement (doi:10.7554/elife.42535), 2019-02-21
Supplement: supp [file elife_poa_e42535_Supplementary_File_2.docx]

**Table S1.** Ultrafast bootstrap (UFBoot) variation for several clades discussed in this study as compositionally-biased sites, according to ɀ, are progressively removed in steps of 10%.

**
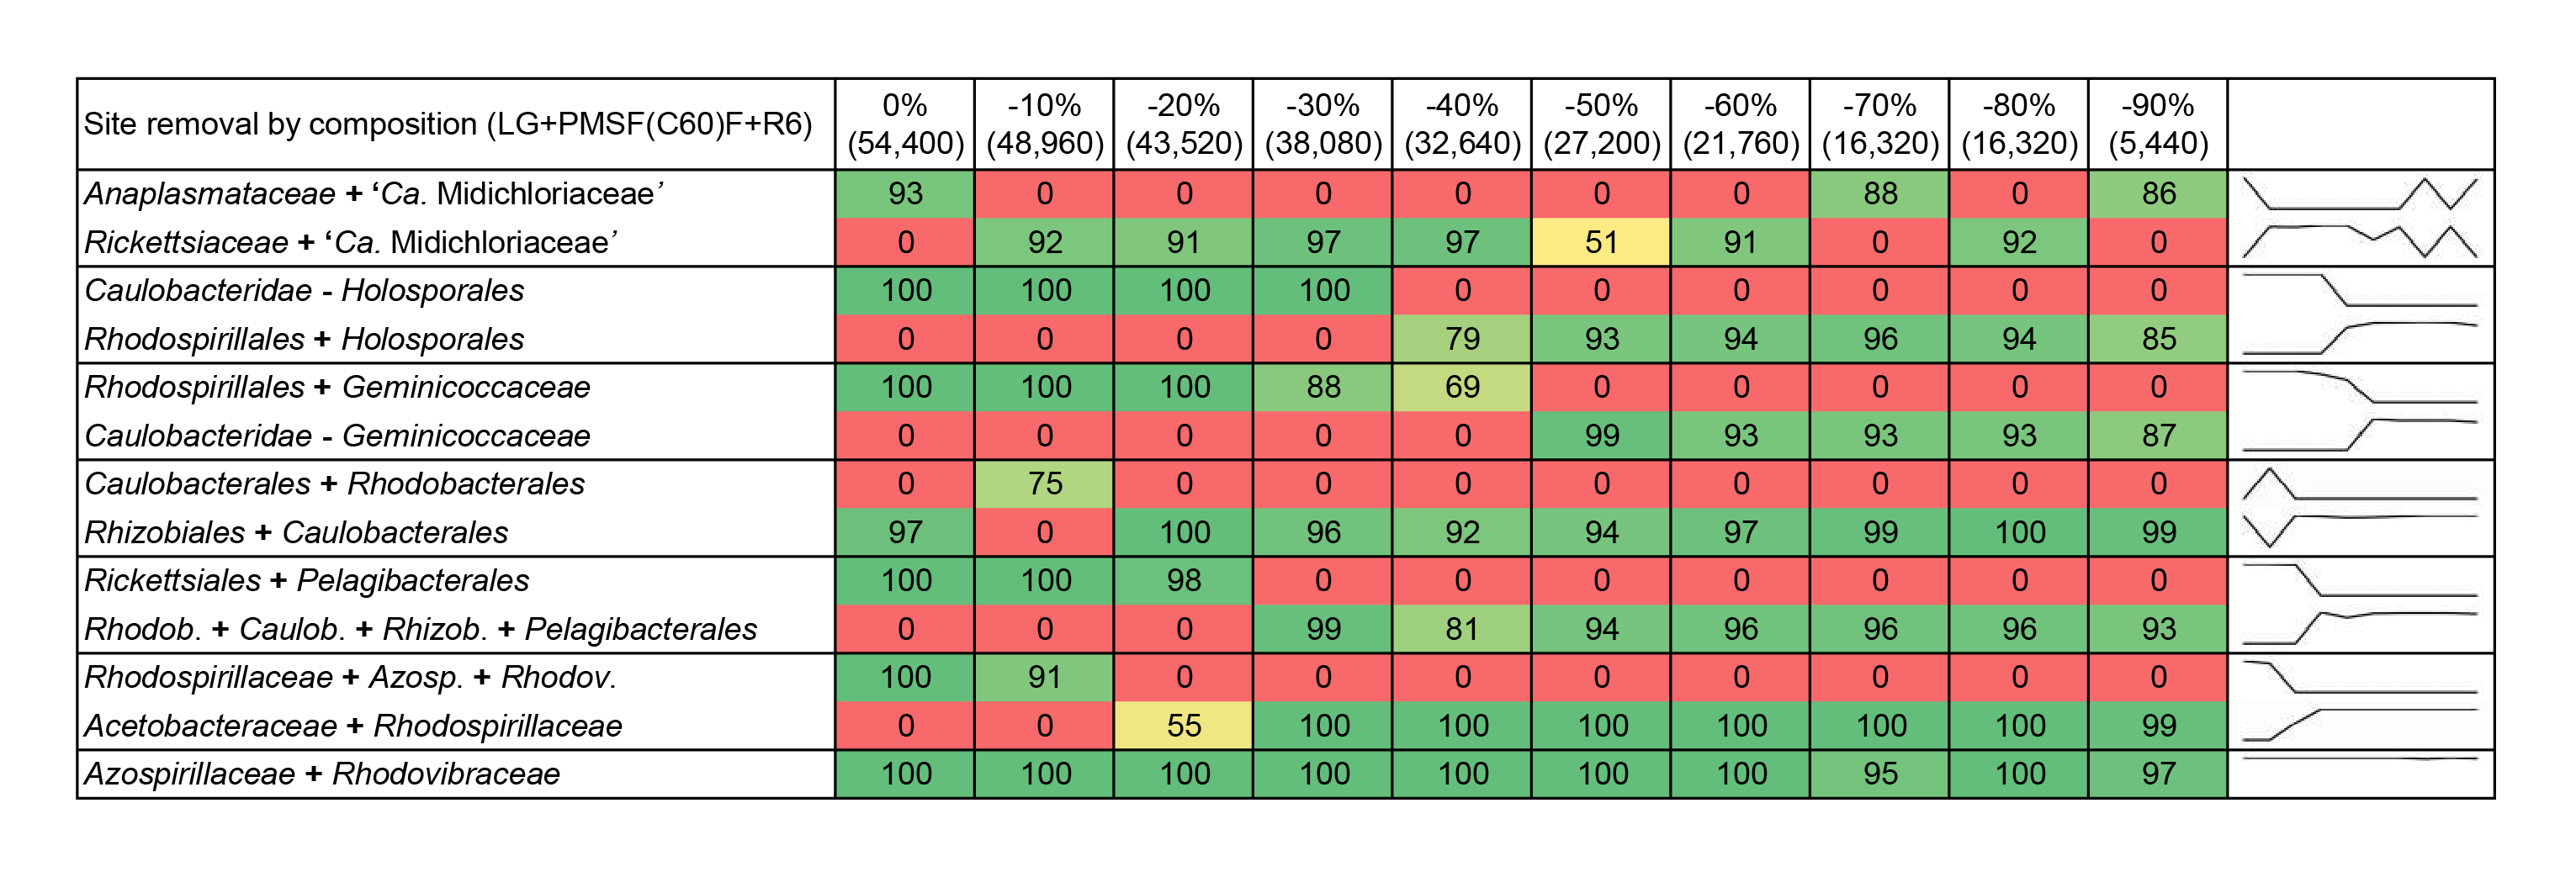
**

**Table S2.** Ultrafast bootstrap (UFBoot) variation for several clades discussed in this study as the fastest sites are progressively removed in steps of 10%.

**
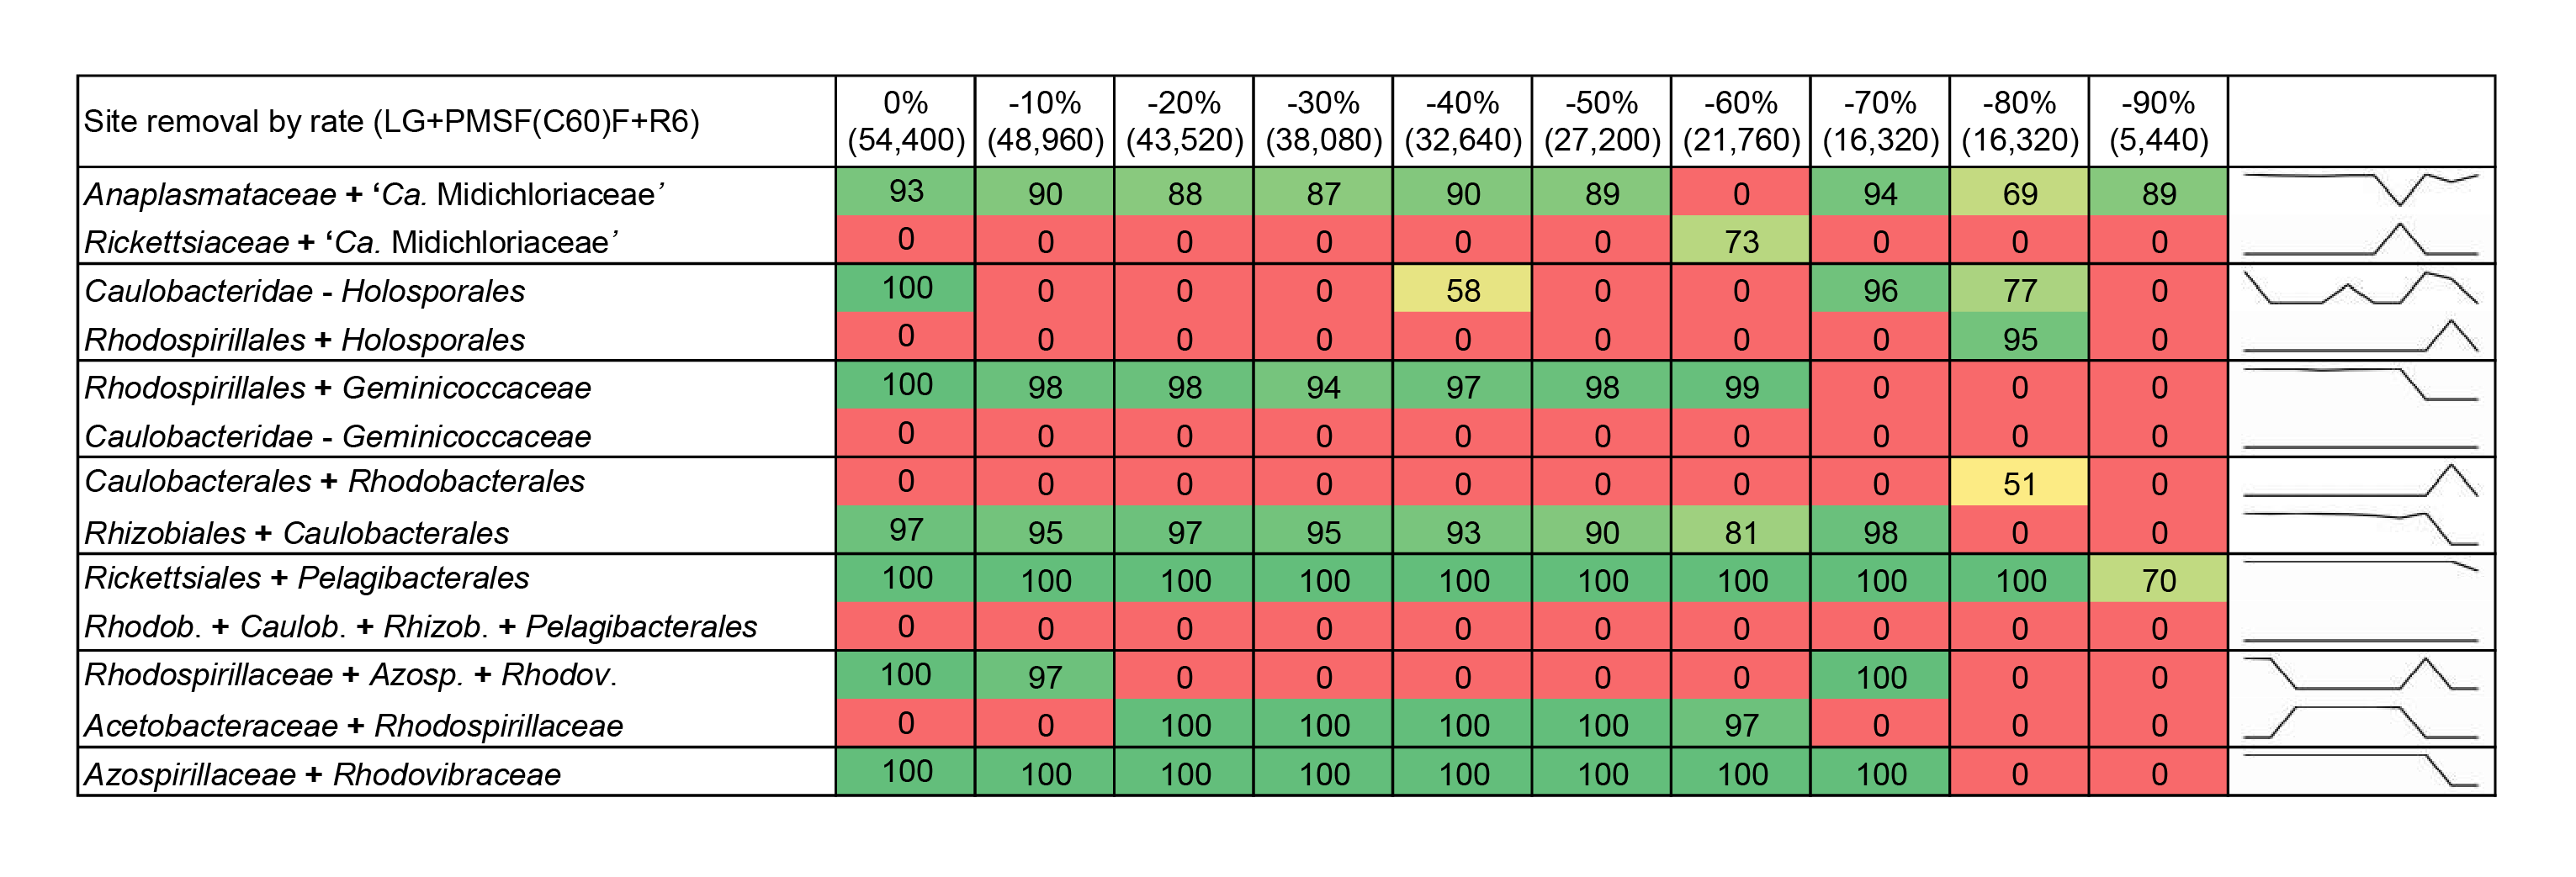
**

**Table S3.** GenBank assembly accession numbers for the 120 alphaproteobacterial and outgroup genomes used in this study.

| **Taxon** | **GenBank assembly accession number** |
| --- | --- |
| *Acidiphilium angustum* ATCC 35903 | GCF_000701585.1 |
| *Acidisphaera rubrifaciens* HS-AP3 | GCF_000964365.1 |
| *Ahrensia* sp. R2A130 | GCF_000179775.1 |
| alphaproteobacterium AAP38 | GCF_001296005.1 |
| alphaproteobacterium AAP81b | GCF_001295935.1 |
| alphaproteobacterium BAL199 | GCF_000171835.1 |
| alphaproteobacterium HIMB114 | GCF_000163555.2 |
| alphaproteobacterium HIMB59 | GCF_000299115.1 |
| alphaproteobacterium IMCC14465 | GCF_000293845.2 |
| alphaproteobacterium L41A | GCF_000335735.1 |
| alphaproteobacterium LLX12A | GCF_000335755.1 |
| alphaproteobacterium Mf 1.05b.01 | GCF_000509225.1 |
| alphaproteobacterium Q-1 | GCF_000710935.1 |
| alphaproteobacterium RS24 | GCF_000469155.1 |
| alphaproteobacterium SCGC AAA280-P20 | GCA_000371845.1 |
| alphaproteobacterium SCGC AAA288-N07 | GCA_000513055.1 |
| alphaproteobacterium sp. HIMB5 | GCA_000299095.1 |
| *Alteromonas lipolytica* | GCF_001758465.1 |
| *Anaplasma phagocytophilum* HZ | GCF_000013125.1 |
| *Asticcacaulis excentricus* CB 48 | GCF_000175215.2 |
| *Bartonella quintana* RM-11 | GCA_000294715.1 |
| *Belnapia moabensis* DSM 16746 | GCA_000745835.1 |
| *Brevundimonas subvibrioides* ATCC 15264 | GCA_000144605.1 |
| *Burkholderia thailandensis* E264 | GCA_000012365.1 |
| *Caedibacter* sp. 37-49 | GCA_001898725.1 |
| *Caedibacter* sp. 38-128 | GCA_001898705.1 |
| *Caedibacter varicaedens* | GCA_001192655.1 |
| *Caenispirillum salinarum* AK4 | GCA_000315795.1 |
| *Candidatus* Arcanobacter lacustris | GCA_000970895.1 |
| *Candidatus* Caedibacter acanthamoebae | GCA_000743035.1 |
| *Candidatus* Finniella lucida | This study |
| *Candidatus* Hepatobacter penaei | GCA_000742475.1 |
| *Candidatus* Jidaibacter acanthamoeba | GCA_000815465.1 |
| *Candidatus* Midichloria mitochondrii IricVA | GCA_000219355.1 |
| *Candidatus* Nucleicultrix amoebiphila FS5 | GCA_002117145.1 |
| *Candidatus* Odyssella thessalonicensis L13 | GCA_000190415.2 |
| *Candidatus* Paracaedibacter acanthamoebae isolate PRA3 | GCA_000742835.1 |
| *Candidatus* Paracaedibacter symbiosus | GCA_000757605.1 |
| *Candidatus* Pelagibacter IMCC9063 | GCA_000195085.1 |
| *Candidatus* Pelagibacter ubique HTCC1002 | GCA_000153525.1 |
| *Candidatus* Pelagibacter ubique HTCC8051 | GCA_000472605.1 |
| *Candidatus* Puniceispirillum marinum IMCC1322 | GCA_000024465.1 |
| *Chelativorans* sp. J32 | GCA_000518985.1 |
| *Citromicrobium* sp. JLT1363 | GCA_000186705.2 |
| *Commensalibacter intestini* A911 | GCA_000231445.2 |
| *Congregibacter litoralis* KT71 | GCA_000153125.2 |
| *Ehrlichia canis* Jake | GCA_000012565.1 |
| *Elioraea tepidiphila* DSM 17972 | GCA_000378465.1 |
| endosymbiont of *Peranema* | This study |
| endosymbiont of *Stachyamoeba* | This study |
| *Enterobacter soli* ATCC BAA-2102 | GCA_001654845.1 |
| *Geminicoccus roseus* DSM 18922 | GCA_000427665.1 |
| *Gluconacetobacter diazotrophicus* PA1 5 | GCA_000021325.1 |
| *Gluconobacter oxydans* H24 | GCA_000311765.1 |
| *Granulibacter bethesdensis* CGDNIH1 | GCA_000014285.2 |
| *Hirschia baltica* ATCC 49814 | GCA_000023785.1 |
| *Holospora obtusa* F1 | GCA_000469665.2 |
| *Holospora undulata* HU1 | GCA_000388175.3 |
| *Hyphomicrobium denitrificans* ATCC 51888 | GCA_000143145.1 |
| *Hyphomonas neptunium* ATCC 15444 | GCA_000013025.1 |
| *Inquilinus limosus* DSM 16000 | GCA_000423185.1 |
| *Jannaschia* sp. EhC01 | GCA_001650845.1 |
| *Ketogulonicigenium vulgare* WSH-001 | GCA_000223375.1 |
| *Kiloniella laminariae* DSM 19542 | GCA_000374005.1 |
| *Kordiimonas gwangyangensis* DSM 19435 - JCM 12864 | GCA_000375545.1 |
| *Magnetococcus marinus* MC-1 | GCA_000014865.1 |
| *Magnetofaba australis* IT-1 | GCA_002109495.1 |
| *Magnetospirillum magneticum* AMB-1 | GCA_000009985.1 |
| *Maricaulis maris* MCS10 | GCA_000014745.1 |
| *Meganema perideroedes* DSM 15528 | GCA_000374145.1 |
| *Methylobacterium extorquens* AM1 | GCA_000022685.1 |
| *Methylocella silvestris* BL2 | GCA_000021745.1 |
| *Methylocystis* sp. SC2 | GCA_000304315.1 |
| *Methylovorus glucosetrophus* SIP3-4 | GCA_000023745.1 |
| *Micavibrio aeruginosavorus* ARL-13 | GCA_000226315.1 |
| *Neorickettsia sennetsu* Miyayama | GCA_000013165.1 |
| *Nitrosospira multiformis* ATCC 25196 | GCA_000196355.1 |
| *Oceanibaculum indicum* P24 | GCA_000299935.1 |
| *Oceanicaulis* sp. HTCC2633 | GCA_000152745.1 |
| *Octadecabacter antarcticus* 307 | GCA_000155675.2 |
| *Orientia tsutsugamushi* Boryong | GCA_000063545.1 |
| *Paracoccus denitrificans* PD1222 | GCA_000203895.1 |
| *Pararhodospirillum photometricum* DSM 122 | GCA_000284415.2 |
| *Parvibaculum lavamentivorans* DS-1 | GCA_000017565.1 |
| *Parvularcula bermudensis* HTCC2503 | GCA_000152825.2 |
| *Pelagibacter* sp. HIMB058 | GCF_000012345.1 |
| *Pelagibacterium halotolerans* B2 | GCA_000230555.1 |
| *Phaeospirillum fulvum* MGU-K5 | GCA_000442515.1 |
| *Phenylobacterium zucineum* HLK1 | GCA_000017265.1 |
| *Polymorphum gilvum* SL003B-26A1 | GCA_000192745.1 |
| *Pseudovibrio* sp. FO-BEG1 | GCA_000236645.1 |
| *Ralstonia solanacearum* GMI1000 | GCA_000009125.1 |
| *Rhizobium leguminosarum* bv. trifolii WSM1689 | GCA_000517605.1 |
| *Rhodobacter sphaeroides* 2.4.1 | GCA_000012905.2 |
| *Rhodocista* sp. MIMtkB3 | GCA_001939945.1 |
| *Rhodomicrobium vannielii* ATCC 17100 | GCA_000166055.1 |
| *Rhodopseudomonas palustris* TIE-1 | GCA_000020445.1 |
| *Rhodospirillum centenum* SW | GCA_000016185.1 |
| *Rhodospirillum rubrum* ATCC 11170 | GCA_000013085.1 |
| *Rhodovibrio salinarum* DSM 9154 | GCA_000515255.1 |
| *Rickettsia typhi* Wilmington | GCA_000008045.1 |
| *Roseibium* sp. TrichSKD4 | GCA_000148725.1 |
| *Roseomonas cervicalis* ATCC 49957 | GCA_000164635.1 |
| *Roseospirillum parvum* strain 930I | GCA_900100455.1 |
| *Rubellimicrobium thermophilum* DSM 16684 | GCA_000442315.1 |
| *Rubritepida flocculans* DSM 14296 | GCA_000425365.1 |
| *Ruegeria* sp. ANG-R | GCA_000813985.1 |
| *Sagittula stellata* E-37 | GCA_000169415.1 |
| *Sneathiella glossodoripedis* JCM 23214 | GCA_000616095.1 |
| *Sphingomonas wittichii* | GCA_000016765.1 |
| *Spongiibacter tropicus* DSM 19543 | GCA_000420325.1 |
| *Terasakiella pusilla* DSM 6293 | GCA_000688235.1 |
| *Thalassobaculum salexigens* DSM 19539 | GCA_000423805.1 |
| *Thalassospira profundimaris* WP0211 | GCA_000300275.1 |
| *Thermopetrobacter* sp. TC1 | GCA_000746275.1 |
| *Tistrella mobilis* KA081020-065 | GCA_000264455.2 |
| *Wolbachia* endosymbiont of *Culex quinquefasciatus* Pel | GCA_000073005.1 |
| *Wolbachia* endosymbiont of *Onchocerca ochengi* | GCA_000306885.1 |
| *Xanthobacter autotrophicus* Py2 | GCA_000017645.1 |
| *Zymomonas mobilis* sub mobilis ATCC 10988 | GCA_000175255.2 |

**Table S4.** A list of the least compositionally heterogeneous genes out of the 200 single-copy and vertically-inherited genes used in this study.

| **#** | **p-value** | **chi-square** | **Marker** | **Annotation** | **Length** |
| --- | --- | --- | --- | --- | --- |
| 1 | 1.0000 | 1.0000 | Alpha.18 | rpsL 30S ribosomal protein S12 | 123 |
| 2 | 1.0000 | 1.0000 | Alpha.66 | recA recombinase A | 332 |
| 3 | 0.9700 | 1.0000 | Alpha.227 | rpsQ 30S ribosomal protein S17 | 76 |
| 4 | 0.9400 | 1.0000 | Alpha.74 | rplT ribosomal protein L20 | 118 |
| 5 | 0.8600 | 1.0000 | Alpha.34 | rplN 50S ribosomal protein L14 | 122 |
| 6 | 0.8600 | 1.0000 | Alpha.60 | rpsI 30S ribosomal protein S9 | 132 |
| 7 | 0.7900 | 1.0000 | Alpha.77 | rpsS 30S ribosomal protein S19 | 92 |
| 8 | 0.7500 | 1.0000 | Alpha.118 | hypothetical protein | 165 |
| 9 | 0.7400 | 1.0000 | Alpha.69 | 30S ribosomal protein S14 | 101 |
| 10 | 0.7400 | 1.0000 | Alpha.107 | 30S ribosomal protein S11 | 122 |
| 11 | 0.7300 | 1.0000 | Alpha.256 | rpsT 30S ribosomal protein S20 | 87 |
| 12 | 0.6800 | 1.0000 | Alpha.136 | 30S ribosomal protein S10 | 101 |
| 13 | 0.6700 | 1.0000 | Alpha.31 | rplK 50S ribosomal protein L11 | 142 |
| 14 | 0.6700 | 1.0000 | Alpha.36 | rpsD 30S ribosomal protein S4 | 205 |
| 15 | 0.6100 | 1.0000 | Alpha.128 | preprotein translocase subunit YajC | 88 |
| 16 | 0.5500 | 1.0000 | Alpha.65 | rpsM 30S ribosomal protein S13 | 122 |
| 17 | 0.5400 | 1.0000 | Alpha.123 | nuoK2 NuoK2 NADH quinone oxidoreductase subunit 11 (chain K) | 102 |
| 18 | 0.4700 | 1.0000 | Alpha.42 | NAD(P)H-quinone oxidoreductase subunit 3 | 120 |
| 19 | 0.4500 | 1.0000 | Alpha.79 | Ribosomal protein L19 | 121 |
| 20 | 0.4400 | 1.0000 | Alpha.70 | rpsH 30S ribosomal protein S8 | 132 |
| 21 | 0.4200 | 1.0000 | Alpha.68 | rpmA 50S ribosomal protein L27 | 84 |
| 22 | 0.3600 | 1.0000 | Alpha.99 | rplM 50S ribosomal protein L13 | 154 |
| 23 | 0.3600 | 1.0000 | Alpha.172 | ATP-dependent HslUV protease peptidase subunit HslV | 176 |
| 24 | 0.3300 | 1.0000 | Alpha.9 | glutaredoxin-like protein grla | 106 |
| 25 | 0.3200 | 1.0000 | Alpha.37 | rpsC 30S ribosomal protein S3 | 213 |
| 26 | 0.2900 | 1.0000 | Alpha.233 | transcriptional regulator | 163 |
| 27 | 0.2800 | 1.0000 | Alpha.12 | 30S ribosomal protein S7 | 156 |
| 28 | 0.2700 | 1.0000 | Alpha.147 | rpsR 30S ribosomal protein S18 | 73 |
| 29 | 0.2600 | 1.0000 | Alpha.67 | DNA-directed RNA polymerase subunit alpha | 331 |
| 30 | 0.2400 | 1.0000 | Alpha.210 | 30S ribosomal protein S6 | 105 |
| 31 | 0.2100 | 1.0000 | Alpha.117 | rpsP 30S ribosomal protein S16 | 103 |
| 32 | 0.2100 | 1.0000 | Alpha.235 | ppa inorganic pyrophosphatase | 174 |
| 33 | 0.1600 | 1.0000 | Alpha.56 | hypothetical protein | 213 |
| 34 | 0.1200 | 1.0000 | Alpha.93 | rplQ 50S ribosomal protein L17 | 124 |
| 35 | 0.1000 | 1.0000 | Alpha.170 | nucleoside diphosphate kinase | 140 |
| 36 | 0.1000 | 1.0000 | Alpha.215 | iojap protein family | 103 |
| 37 | 0.0900 | 1.0000 | Alpha.39 | rplE 50S ribosomal protein L5 | 179 |
| 38 | 0.0900 | 1.0000 | Alpha.73 | rplV 50S ribosomal protein L22 | 116 |
| 39 | 0.0600 | 1.0000 | Alpha.41 | infC translation initiation factor IF-3 | 165 |
| 40 | 0.0600 | 1.0000 | Alpha.149 | 30S ribosomal protein S15 | 89 |

**Table S5.** Model fit of amino acid replacement matrices as components of simple models that do not account for compositional heterogeneity across sites. Models are ordered from lowest to highest BIC. -LnL: log-likelihood; df: degrees of freedom or number of free parameters; AIC: Akaike information criterion; AICc: corrected Akaike information criterion; BIC: Bayesian information criterion.

| **Model** | **-LnL** | **df** | **AIC** | **AICc** | **BIC** |
| --- | --- | --- | --- | --- | --- |
| Poisson+F+G4 | 7659896.621 | 257 | 15320307.242 | 15320309.691 | 15322595.601 |
| Dayhoff+F+G4 | 7091431.338 | 257 | 14183376.676 | 14183379.125 | 14185665.035 |
| JTT+F+G4 | 7078685.705 | 257 | 14157885.411 | 14157887.860 | 14160173.769 |
| BLOSUM62+F+G4 | 7054099.636 | 257 | 14108713.272 | 14108715.721 | 14111001.631 |
| WAG+F+G4 | 7006674.211 | 257 | 14013862.421 | 14013864.870 | 14016150.780 |
| LG+F+G4 | 6975286.517 | 257 | 13951087.035 | 13951089.484 | 13953375.394 |

**Table S6.** Model fit of amino acid replacement matrices as components of complex models that account for compositional heterogeneity across sites. Models are ordered from lowest to highest BIC. -LnL: log-likelihood; df: degrees of freedom or number of free parameters; AIC: Akaike information criterion; AICc: corrected Akaike information criterion; BIC: Bayesian information criterion.

| **Model** | **-LnL** | **df** | **AIC** | **AICc** | **BIC** |
| --- | --- | --- | --- | --- | --- |
| Poisson+ES60+F+R6 | 6879393.128 | 326 | 13759438.256 | 13759442.199 | 13762340.999 |
| Dayhoff+ES60+F+R6 | 6759599.477 | 326 | 13519850.954 | 13519854.897 | 13522753.697 |
| JTT+ES60+F+R6 | 6744047.628 | 326 | 13488747.256 | 13488751.199 | 13491649.999 |
| BLOSUM62+ES60+F+R6 | 6732833.254 | 326 | 13466318.509 | 13466322.452 | 13469221.252 |
| WAG+ES60+F+R6 | 6725632.546 | 326 | 13451917.093 | 13451921.036 | 13454819.836 |
| LG+ES60+F+R6 | 6723504.529 | 326 | 13447661.058 | 13447665.001 | 13450563.801 |

**Table S7.** Model fit of LG+ES60+F for which the model component that accounts for rate heterogeneity across sites varies. Models are ordered from lowest to highest BIC. -LnL: log-likelihood; df: degrees of freedom or number of free parameters; AIC: Akaike information criterion; AICc: corrected Akaike information criterion; BIC: Bayesian information criterion.

| **Model** | **-LnL** | **df** | **AIC** | **AICc** | **BIC** |
| --- | --- | --- | --- | --- | --- |
| LG+ES60+F+G | 6742494.385 | 317 | 13485622.770 | 13485626.498 | 13488445.376 |
| LG+ES60+F+R4 | 6739954.613 | 322 | 13480553.226 | 13480557.073 | 13483420.352 |
| LG+ES60+F+R5 | 6730038.899 | 324 | 13460725.798 | 13460729.693 | 13463610.733 |
| LG+ES60+F+R6 | 6723504.529 | 326 | 13447661.058 | 13447665.001 | 13450563.801 |

**Table S8.** Several summary statistics for the PhyloBayes MCMC chains run for each analysis under the CAT-Poisson+Γ4.

| **Figure/PhyloBayes analysis** | **Parameter** | **Effective sample size** | **Discrepancy** |
| --- | --- | --- | --- |
| **Fig. S4A** Chain 1: 9165 cycles Chain 2: 9160 cycles maxdiff: 1 meandiff: 0.0173201 | loglik | 19 | 0.1234140 |
| length | 130 | 3.2251700 |
| alpha | 117 | 0.2423630 |
| Nmode | 49 | 0.1955280 |
| statent | 38 | 0.0286658 |
| statalpha | 21 | 0.0002796 |
| **Fig. S4B**  Chain 1: 43770 cycles Chain 2: 34846 cycles maxdiff: 0.438046 meandiff: 0.0026012 | loglik | 133 | 0.0273831 |
| length | 866 | 0.0332865 |
| alpha | 932 | 0.0736650 |
| Nmode | 267 | 0.0311482 |
| statent | 199 | 0.0898815 |
| statalpha | 506 | 0.0661686 |
| **Fig. S11A**  Chain 1: 15651 cycles Chain 2: 15566 cycles maxdiff: 0.0272492 meandiff: 0.00014417 | loglik | 107 | 0.0384224 |
| length | 272 | 0.0007326 |
| alpha | 615 | 0.0854009 |
| Nmode | 103 | 0.0315492 |
| statent | 223 | 0.1356220 |
| statalpha | 452 | 0.0614499 |
| **Fig. S11B**  Chain 1: 28047 cycles Chain 2: 26102 cycles maxdiff: 0.0804344 meandiff: 0.00285125 | loglik | 158 | 0.0584390 |
| length | 132 | 0.1859400 |
| alpha | 172 | 0.0255812 |
| Nmode | 2972 | 0.0242992 |
| statent | 122 | 0.0597558 |
| statalpha | 3712 | 0.0133815 |
| **Fig. S13**  Chain 1: 20121 cycles Chain 2: 20874 cycles maxdiff: 0.100318 meandiff: 0.00167925 | loglik | 10767 | 0.0546108 |
| length | 4357 | 0.0613948 |
| alpha | 891 | 0.0160582 |
| Nmode | 1913 | 0.0870560 |
| statent | 3092 | 0.0017995 |
| statalpha | 2457 | 0.0203763 |
