# Supplementary figures and images for: An updated phylogeny of the Alphaproteobacteria reveals that the parasitic Rickettsiales and Holosporales have independent origins
Source: eLife journal article supplement (doi:10.7554/elife.42535), 2019-02-21

A.

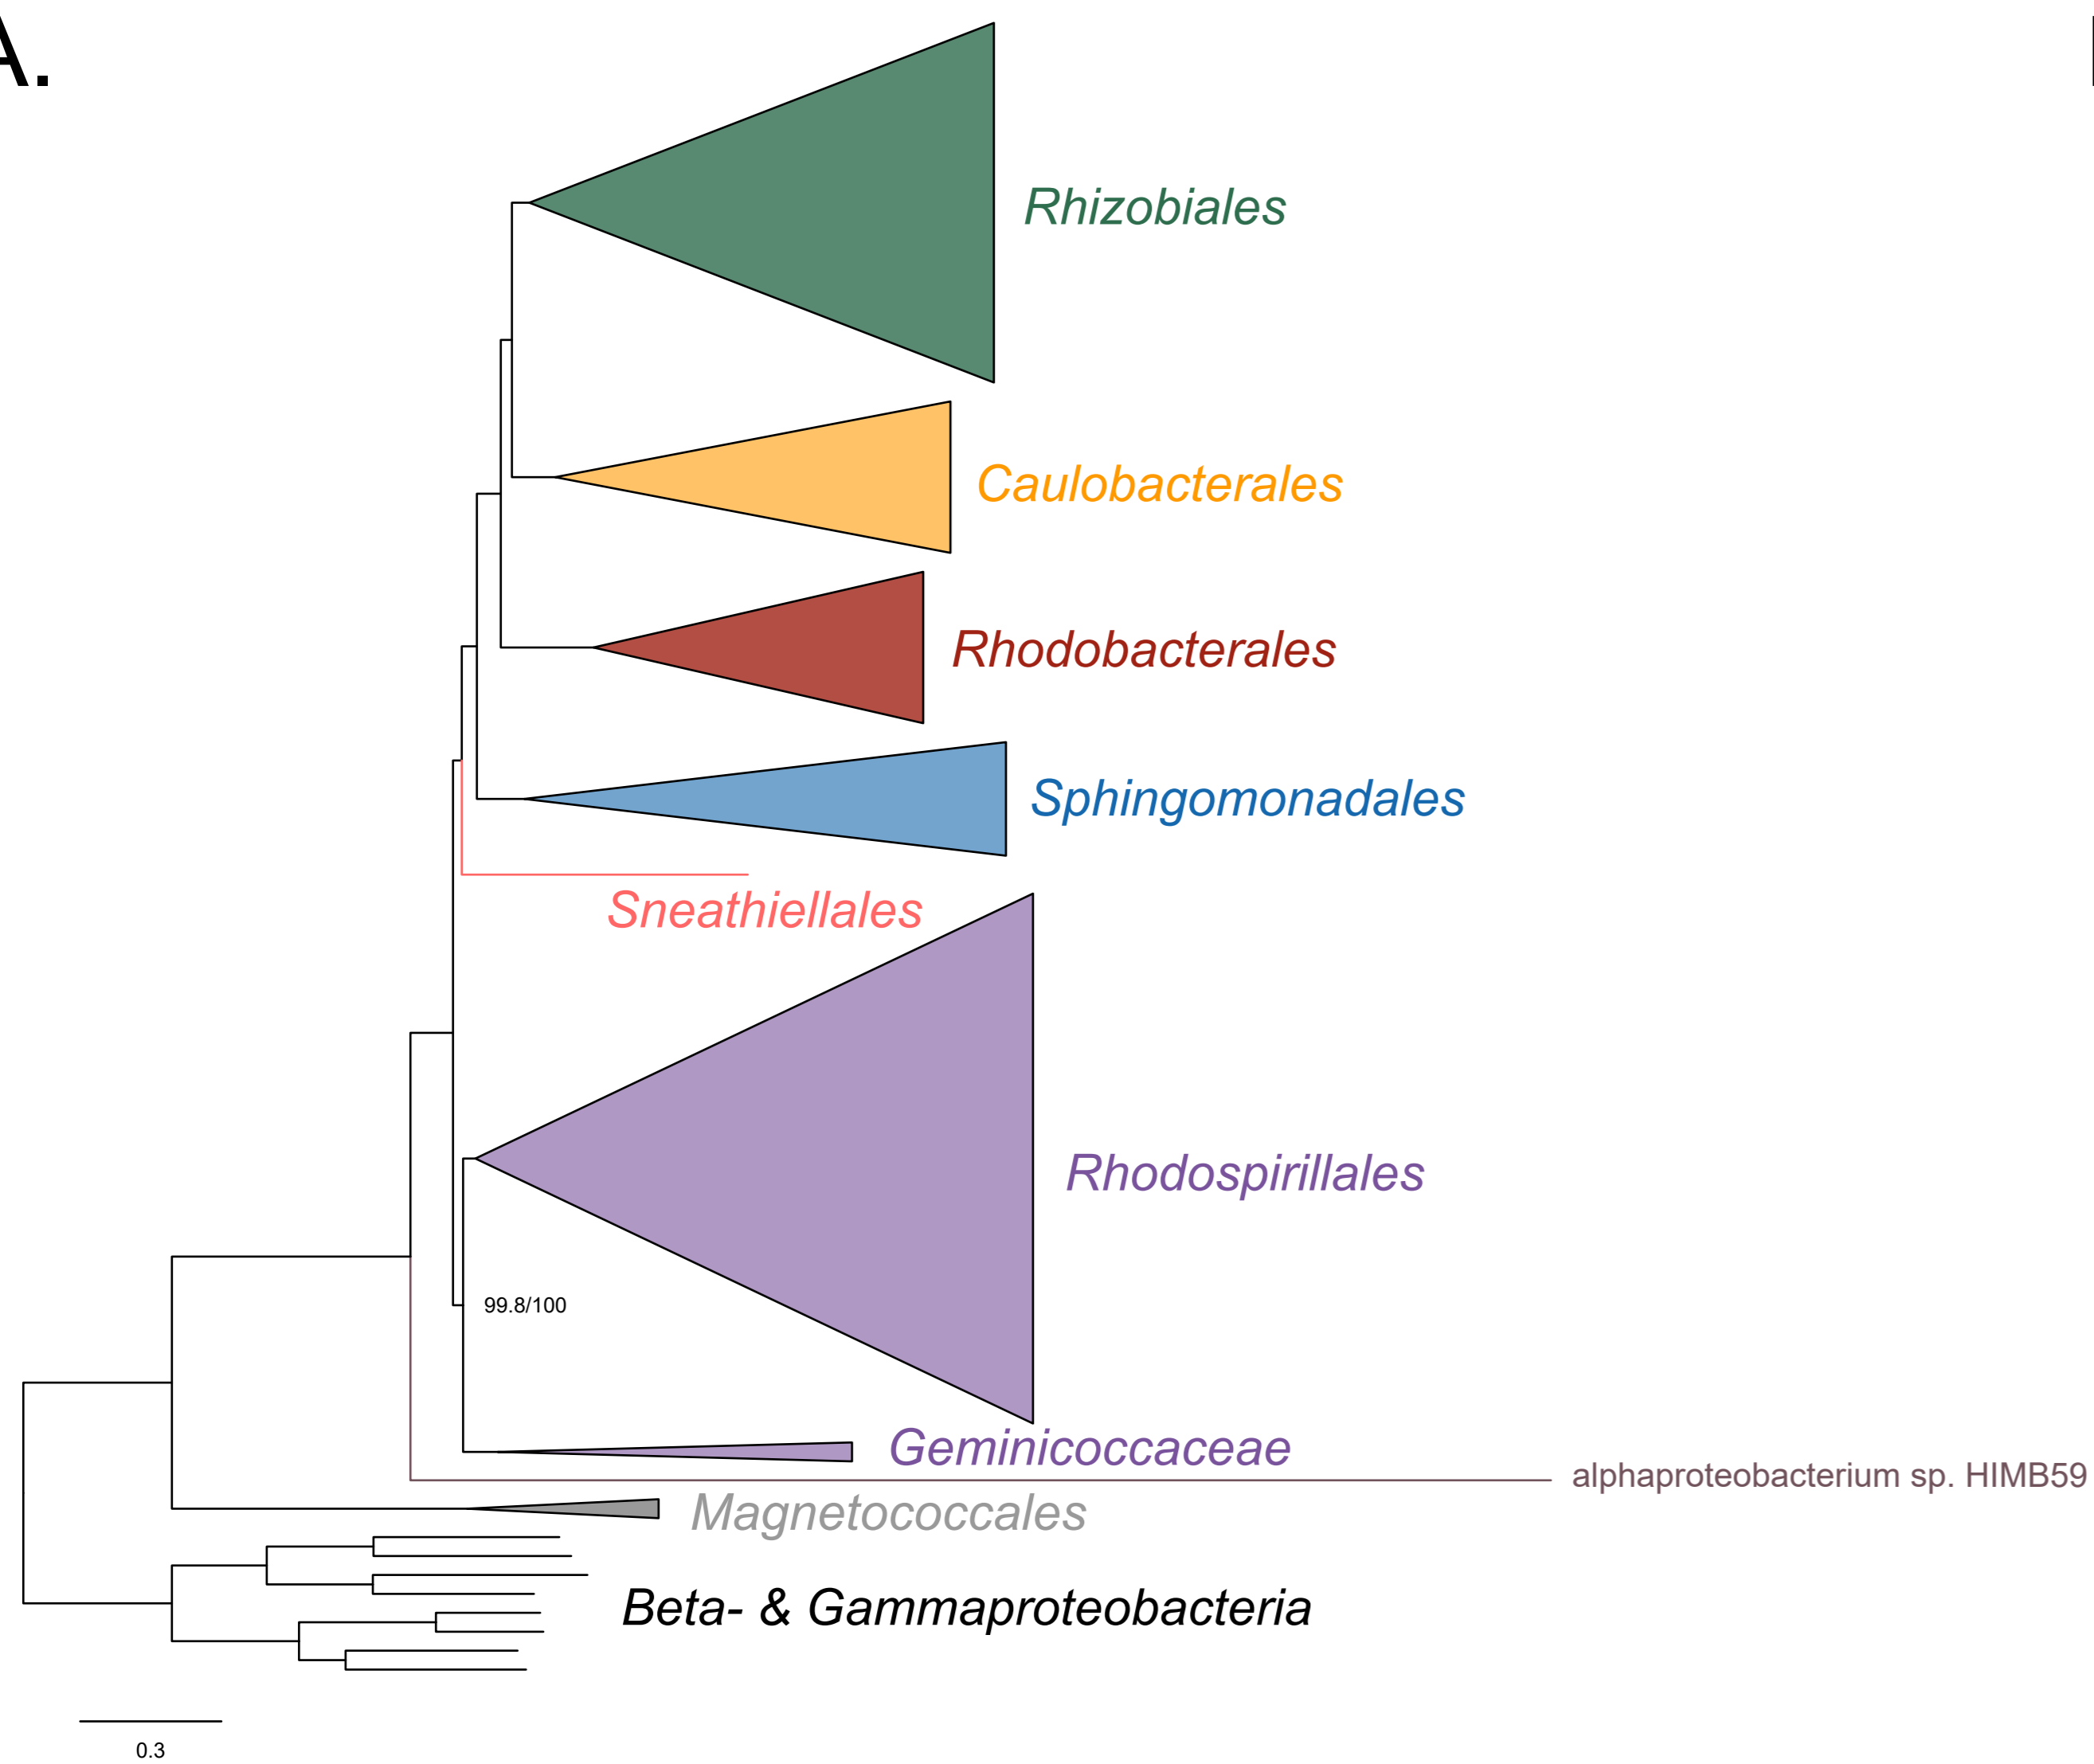

B.

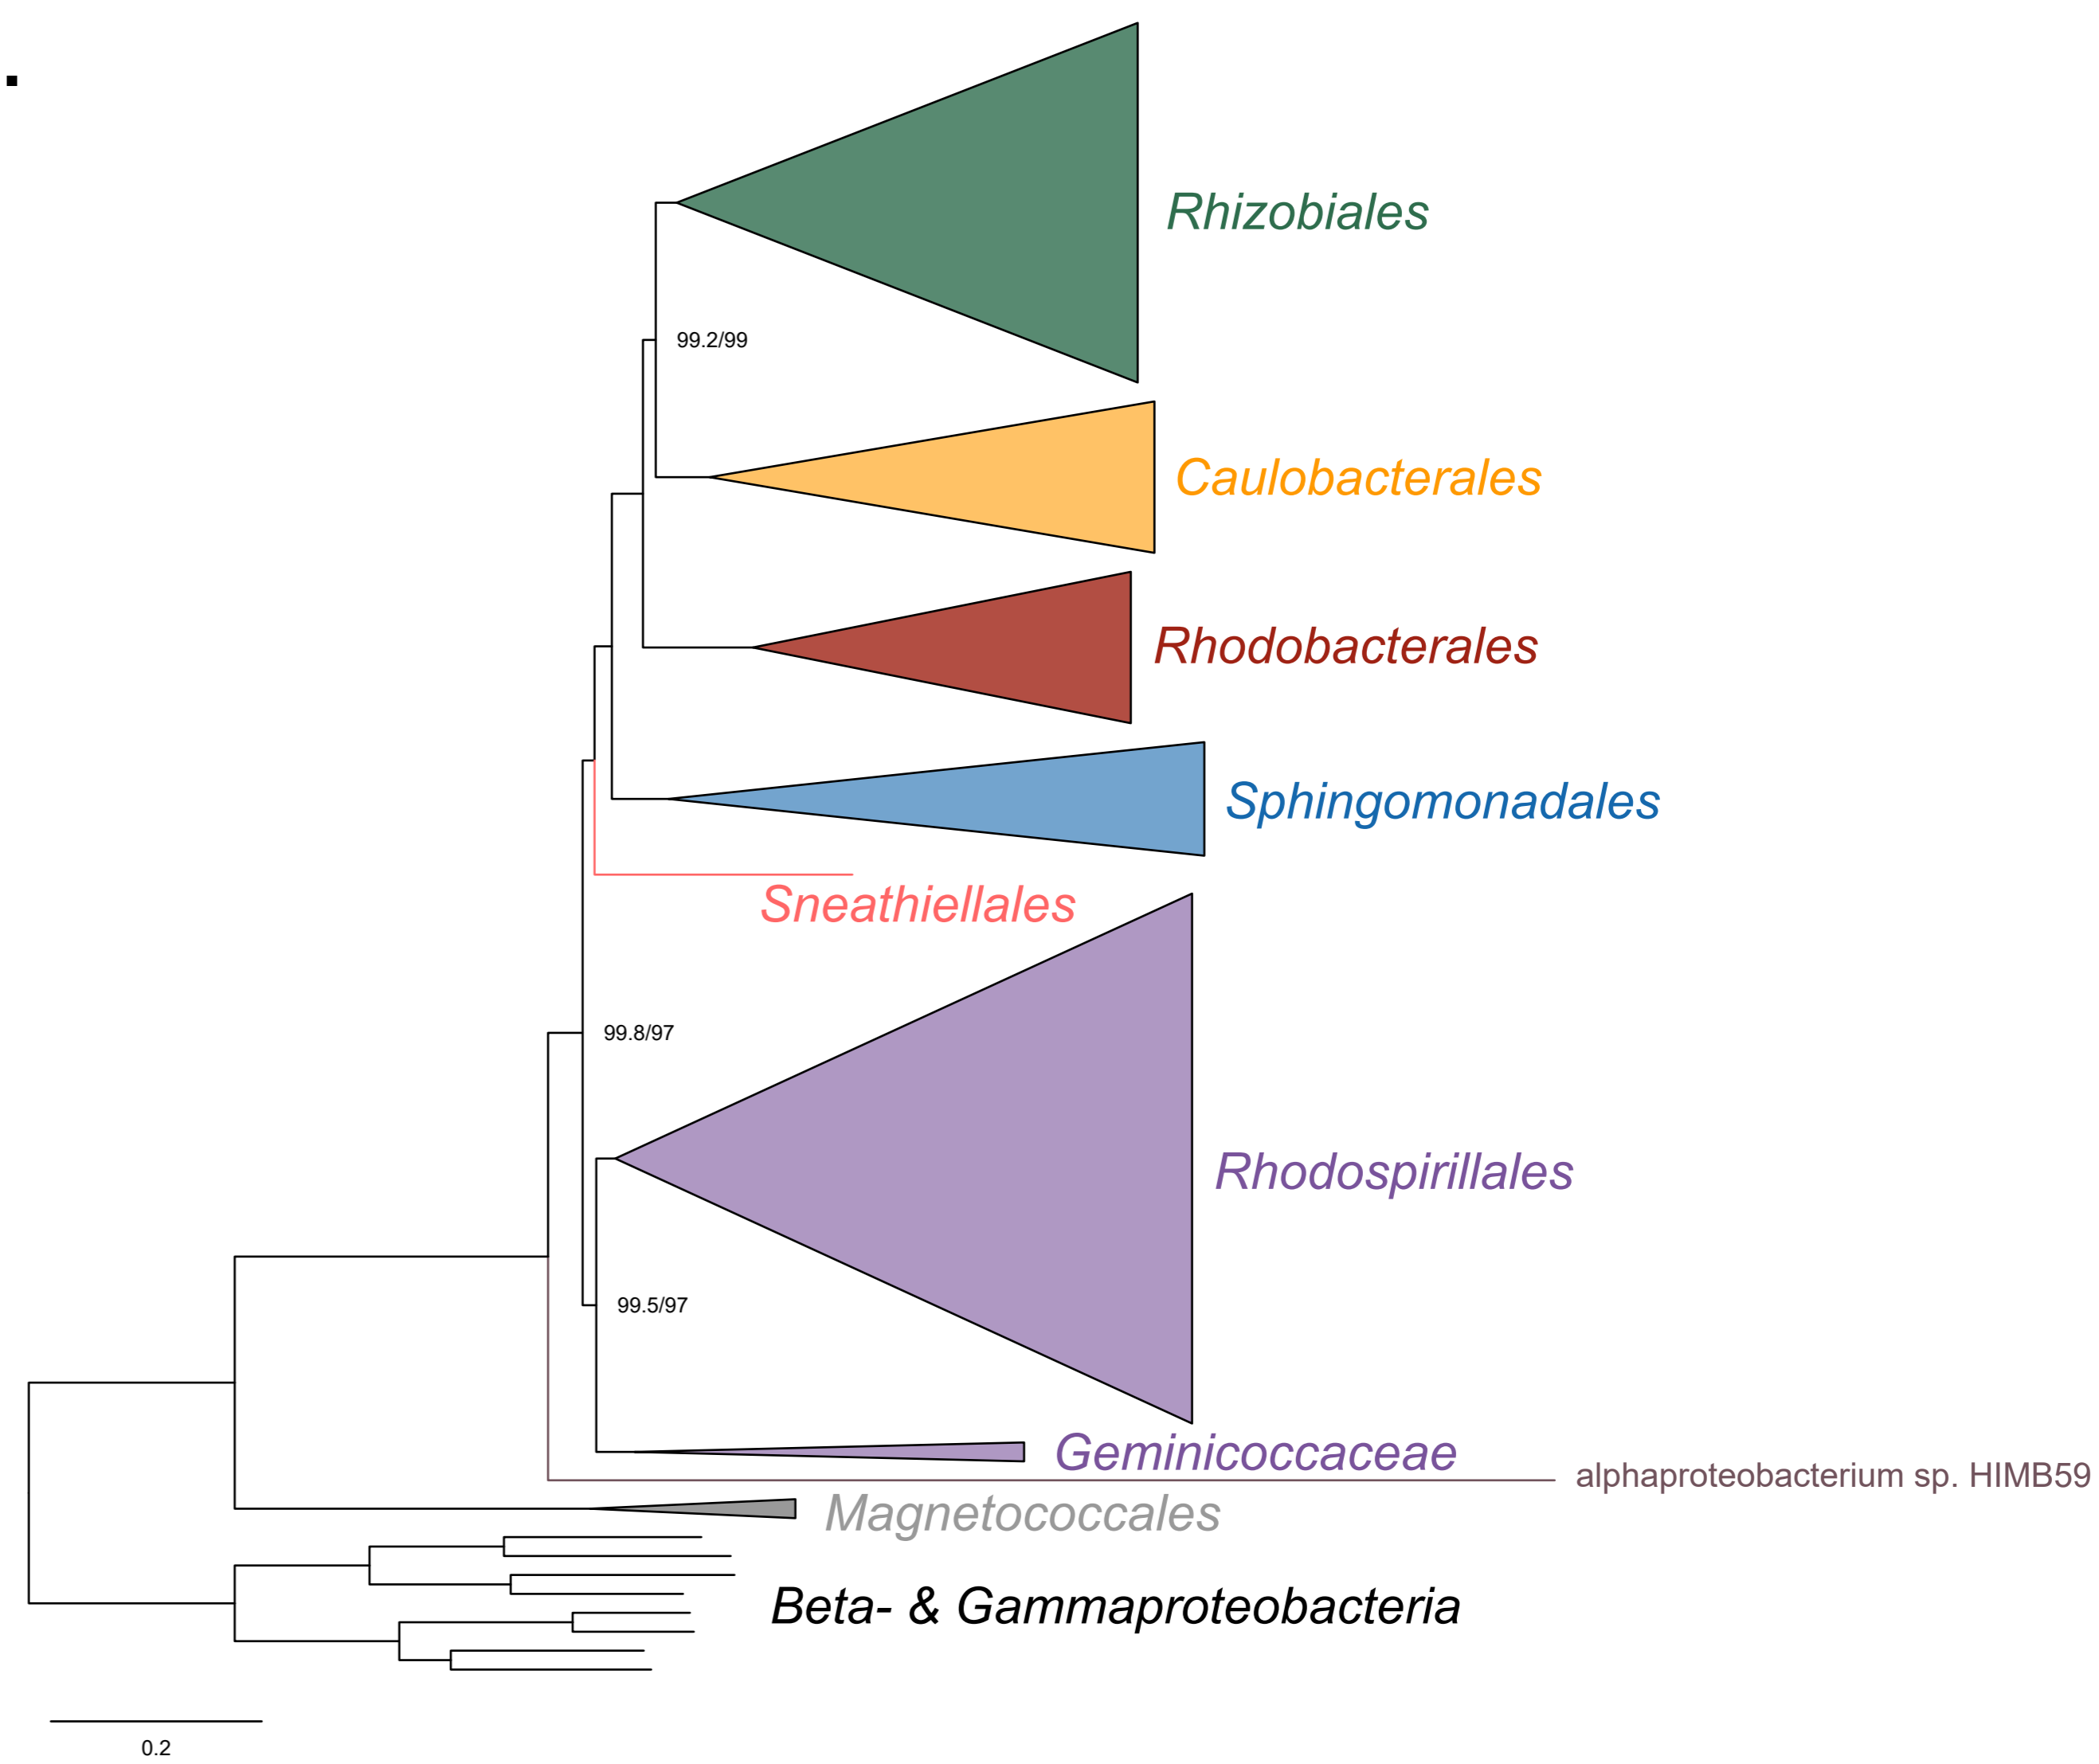

C.

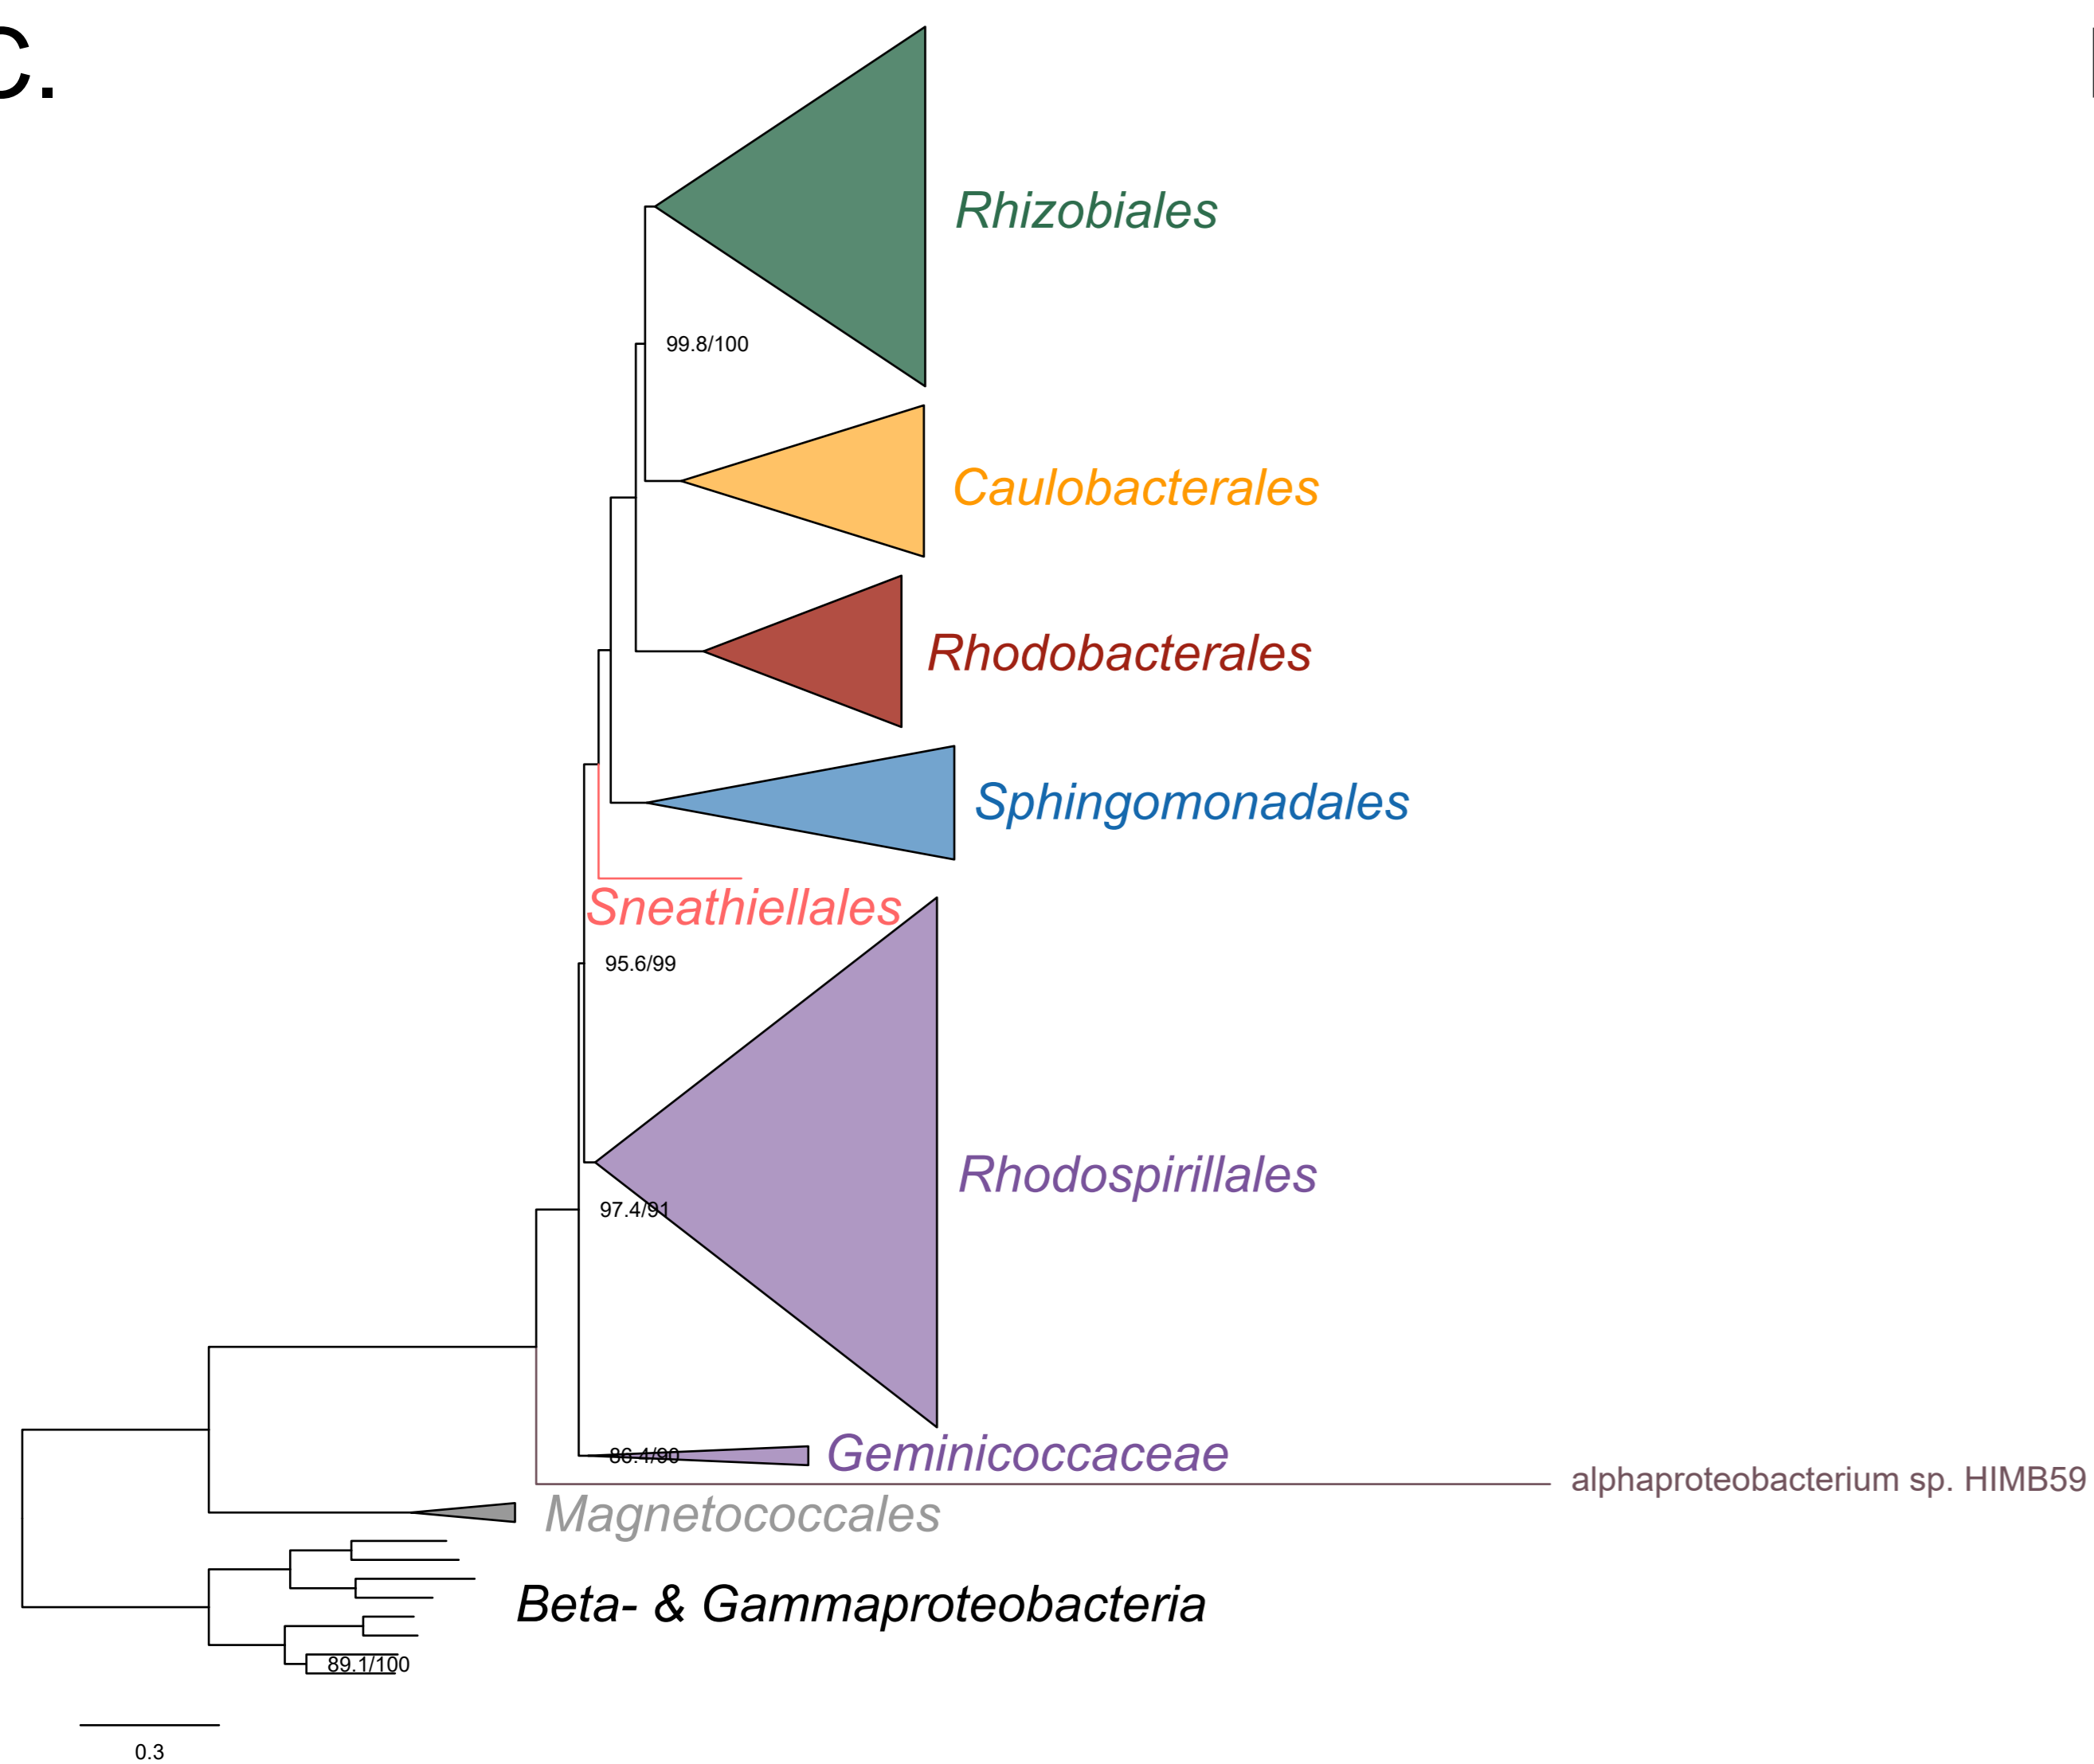

D.

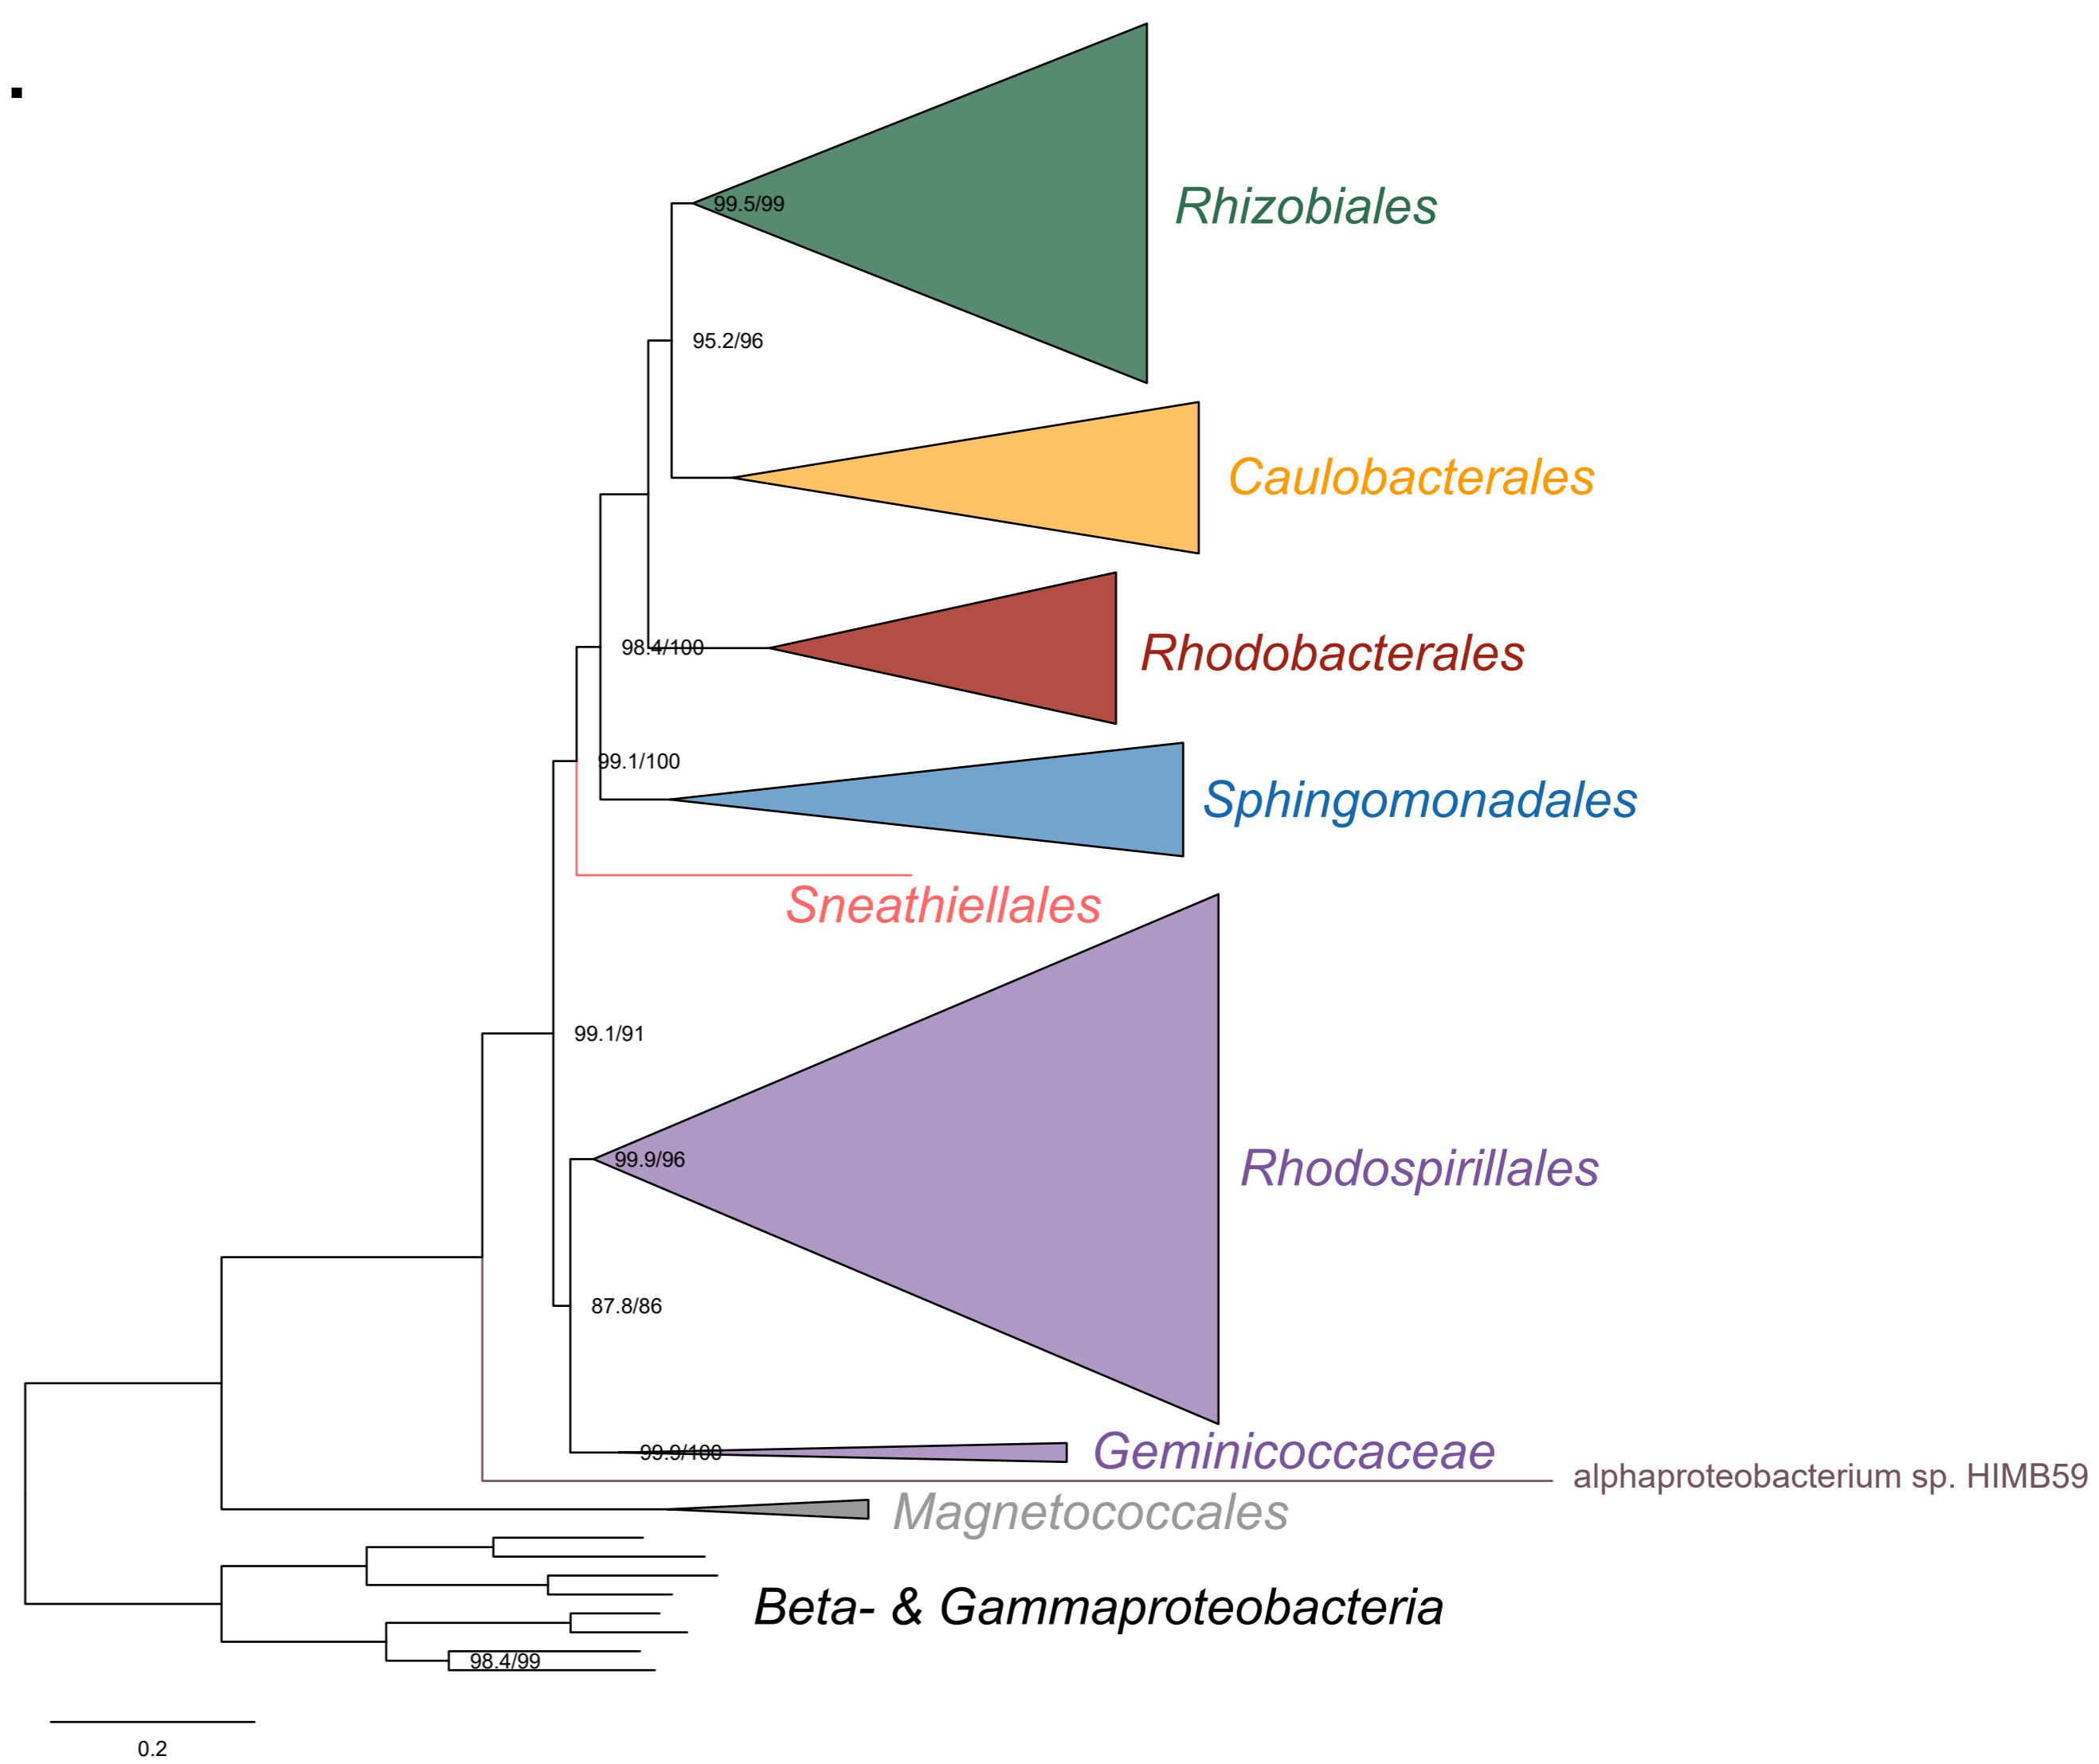

Supplement: supp [file elife-42535-supp-v2.zip › elife_poa_e42535_Figure_3_figure_supplement_5.pdf]

A.

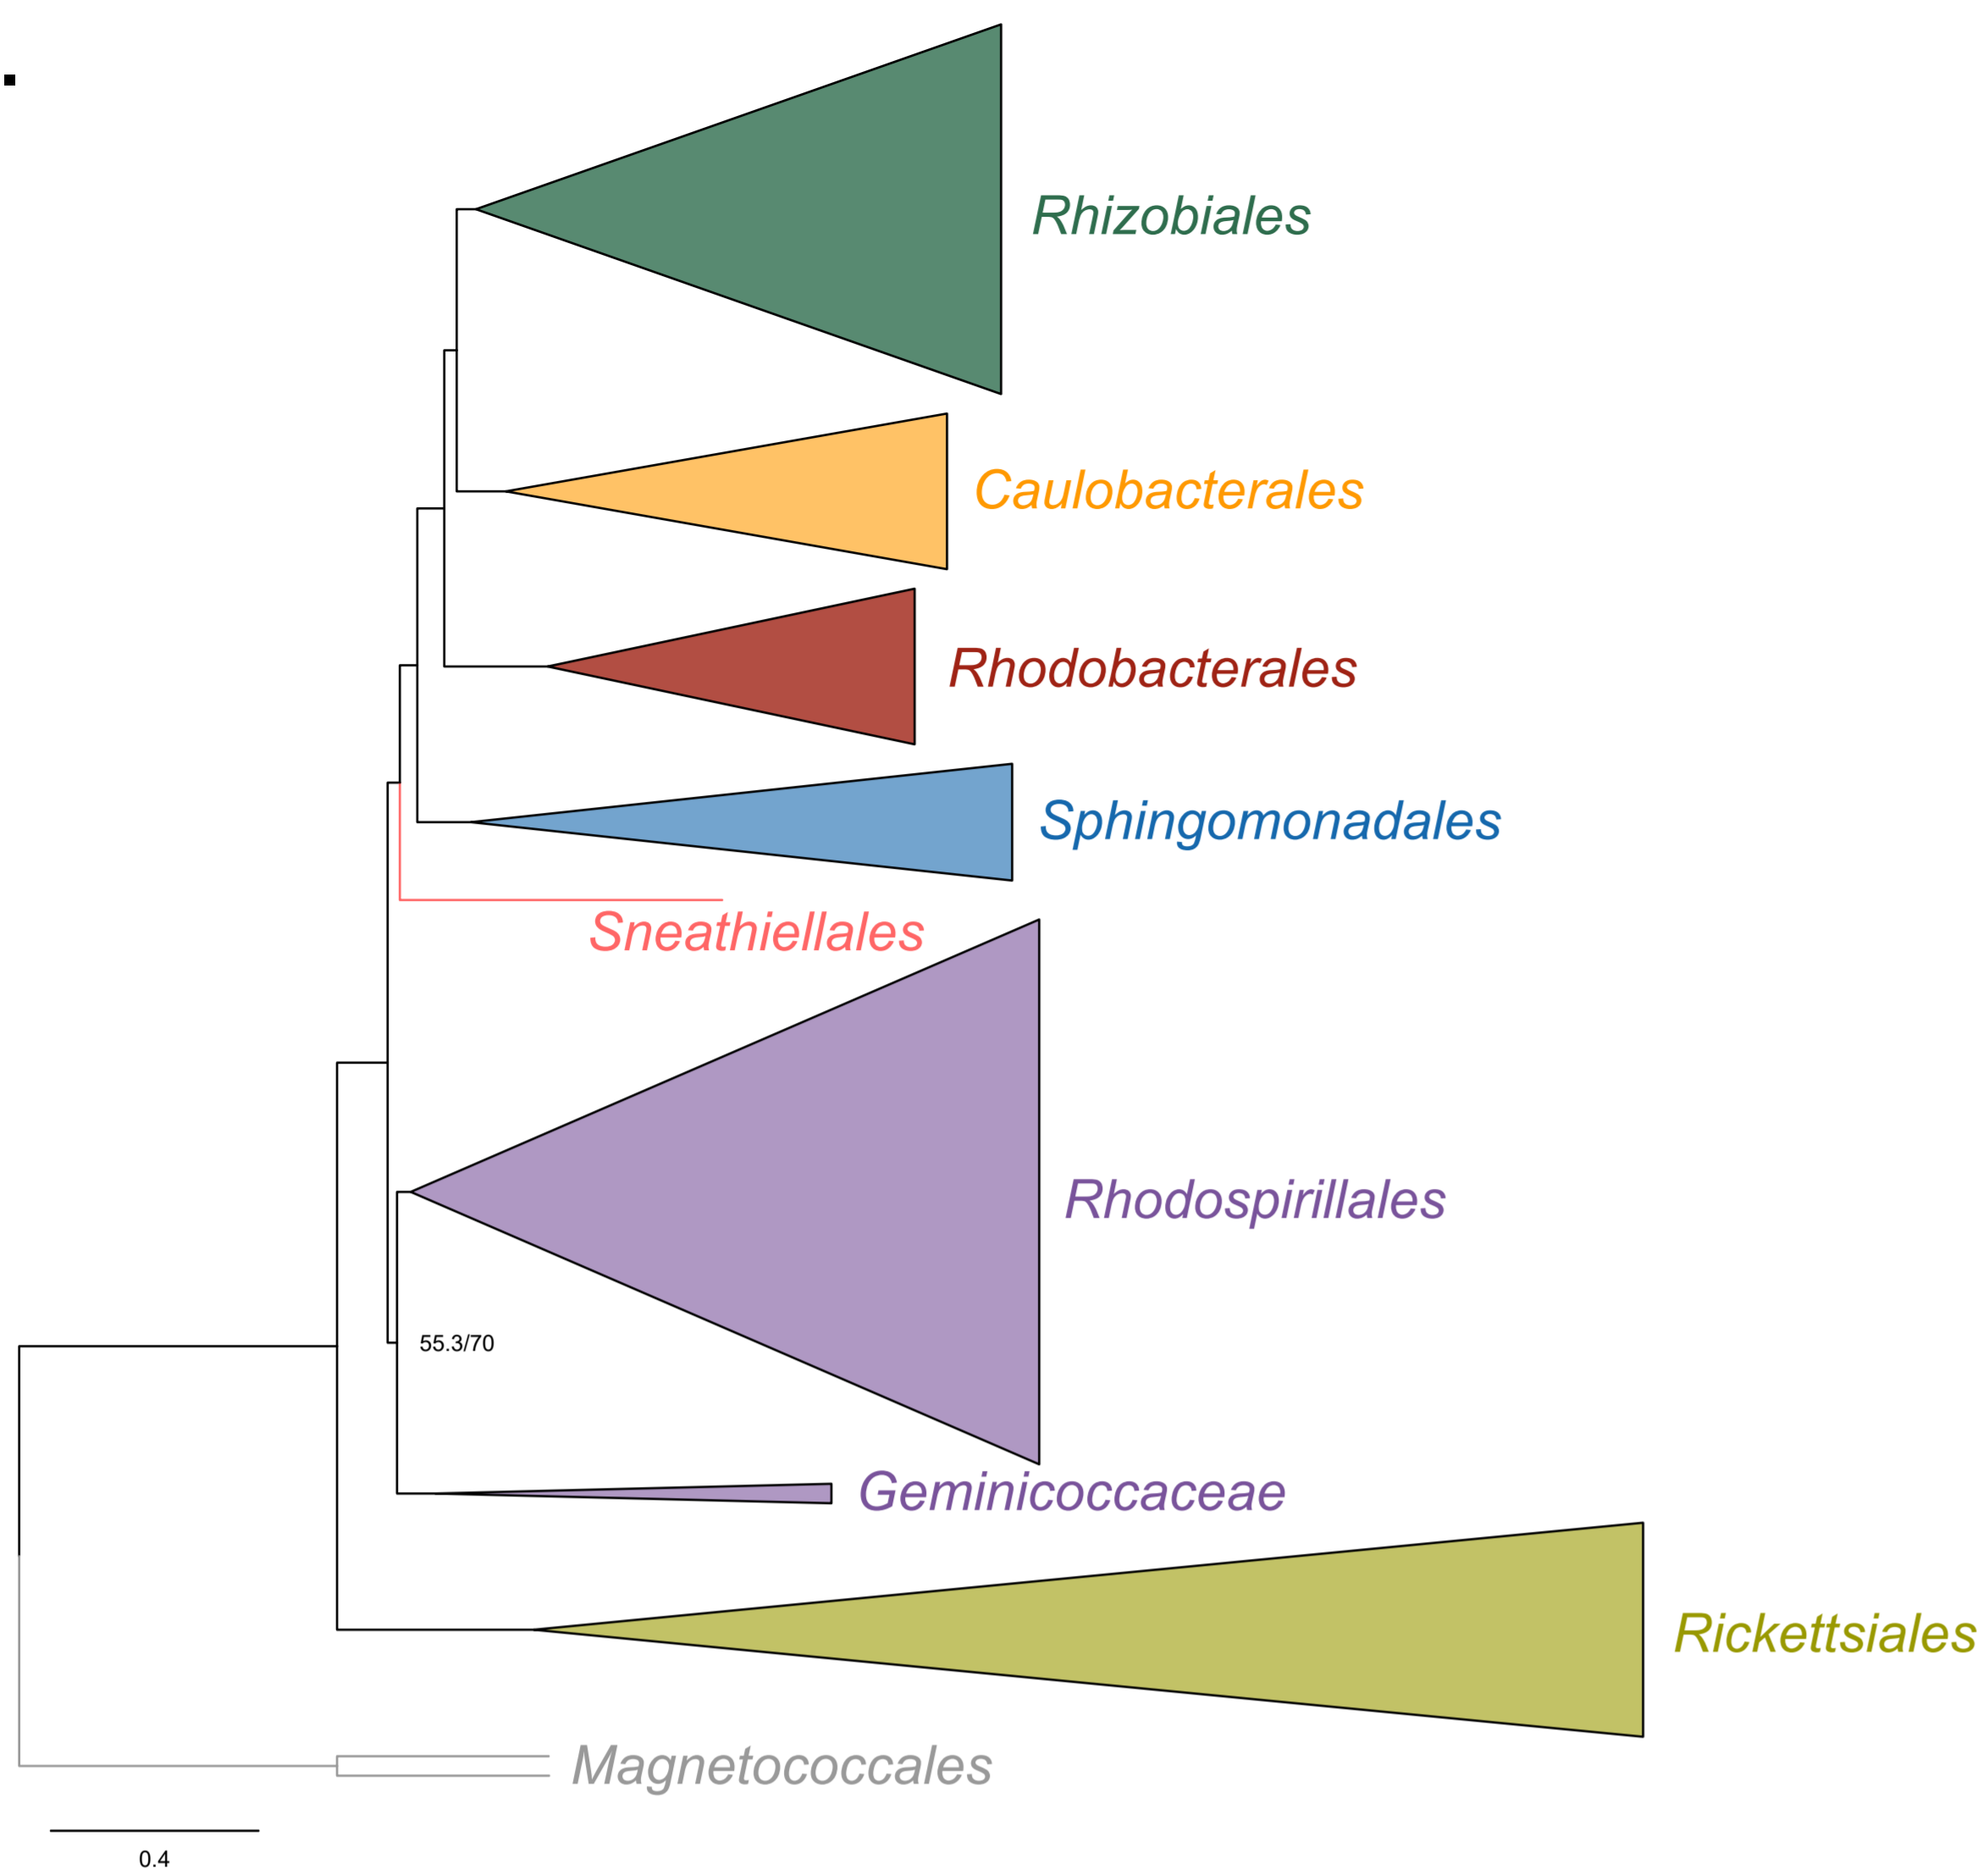

B.

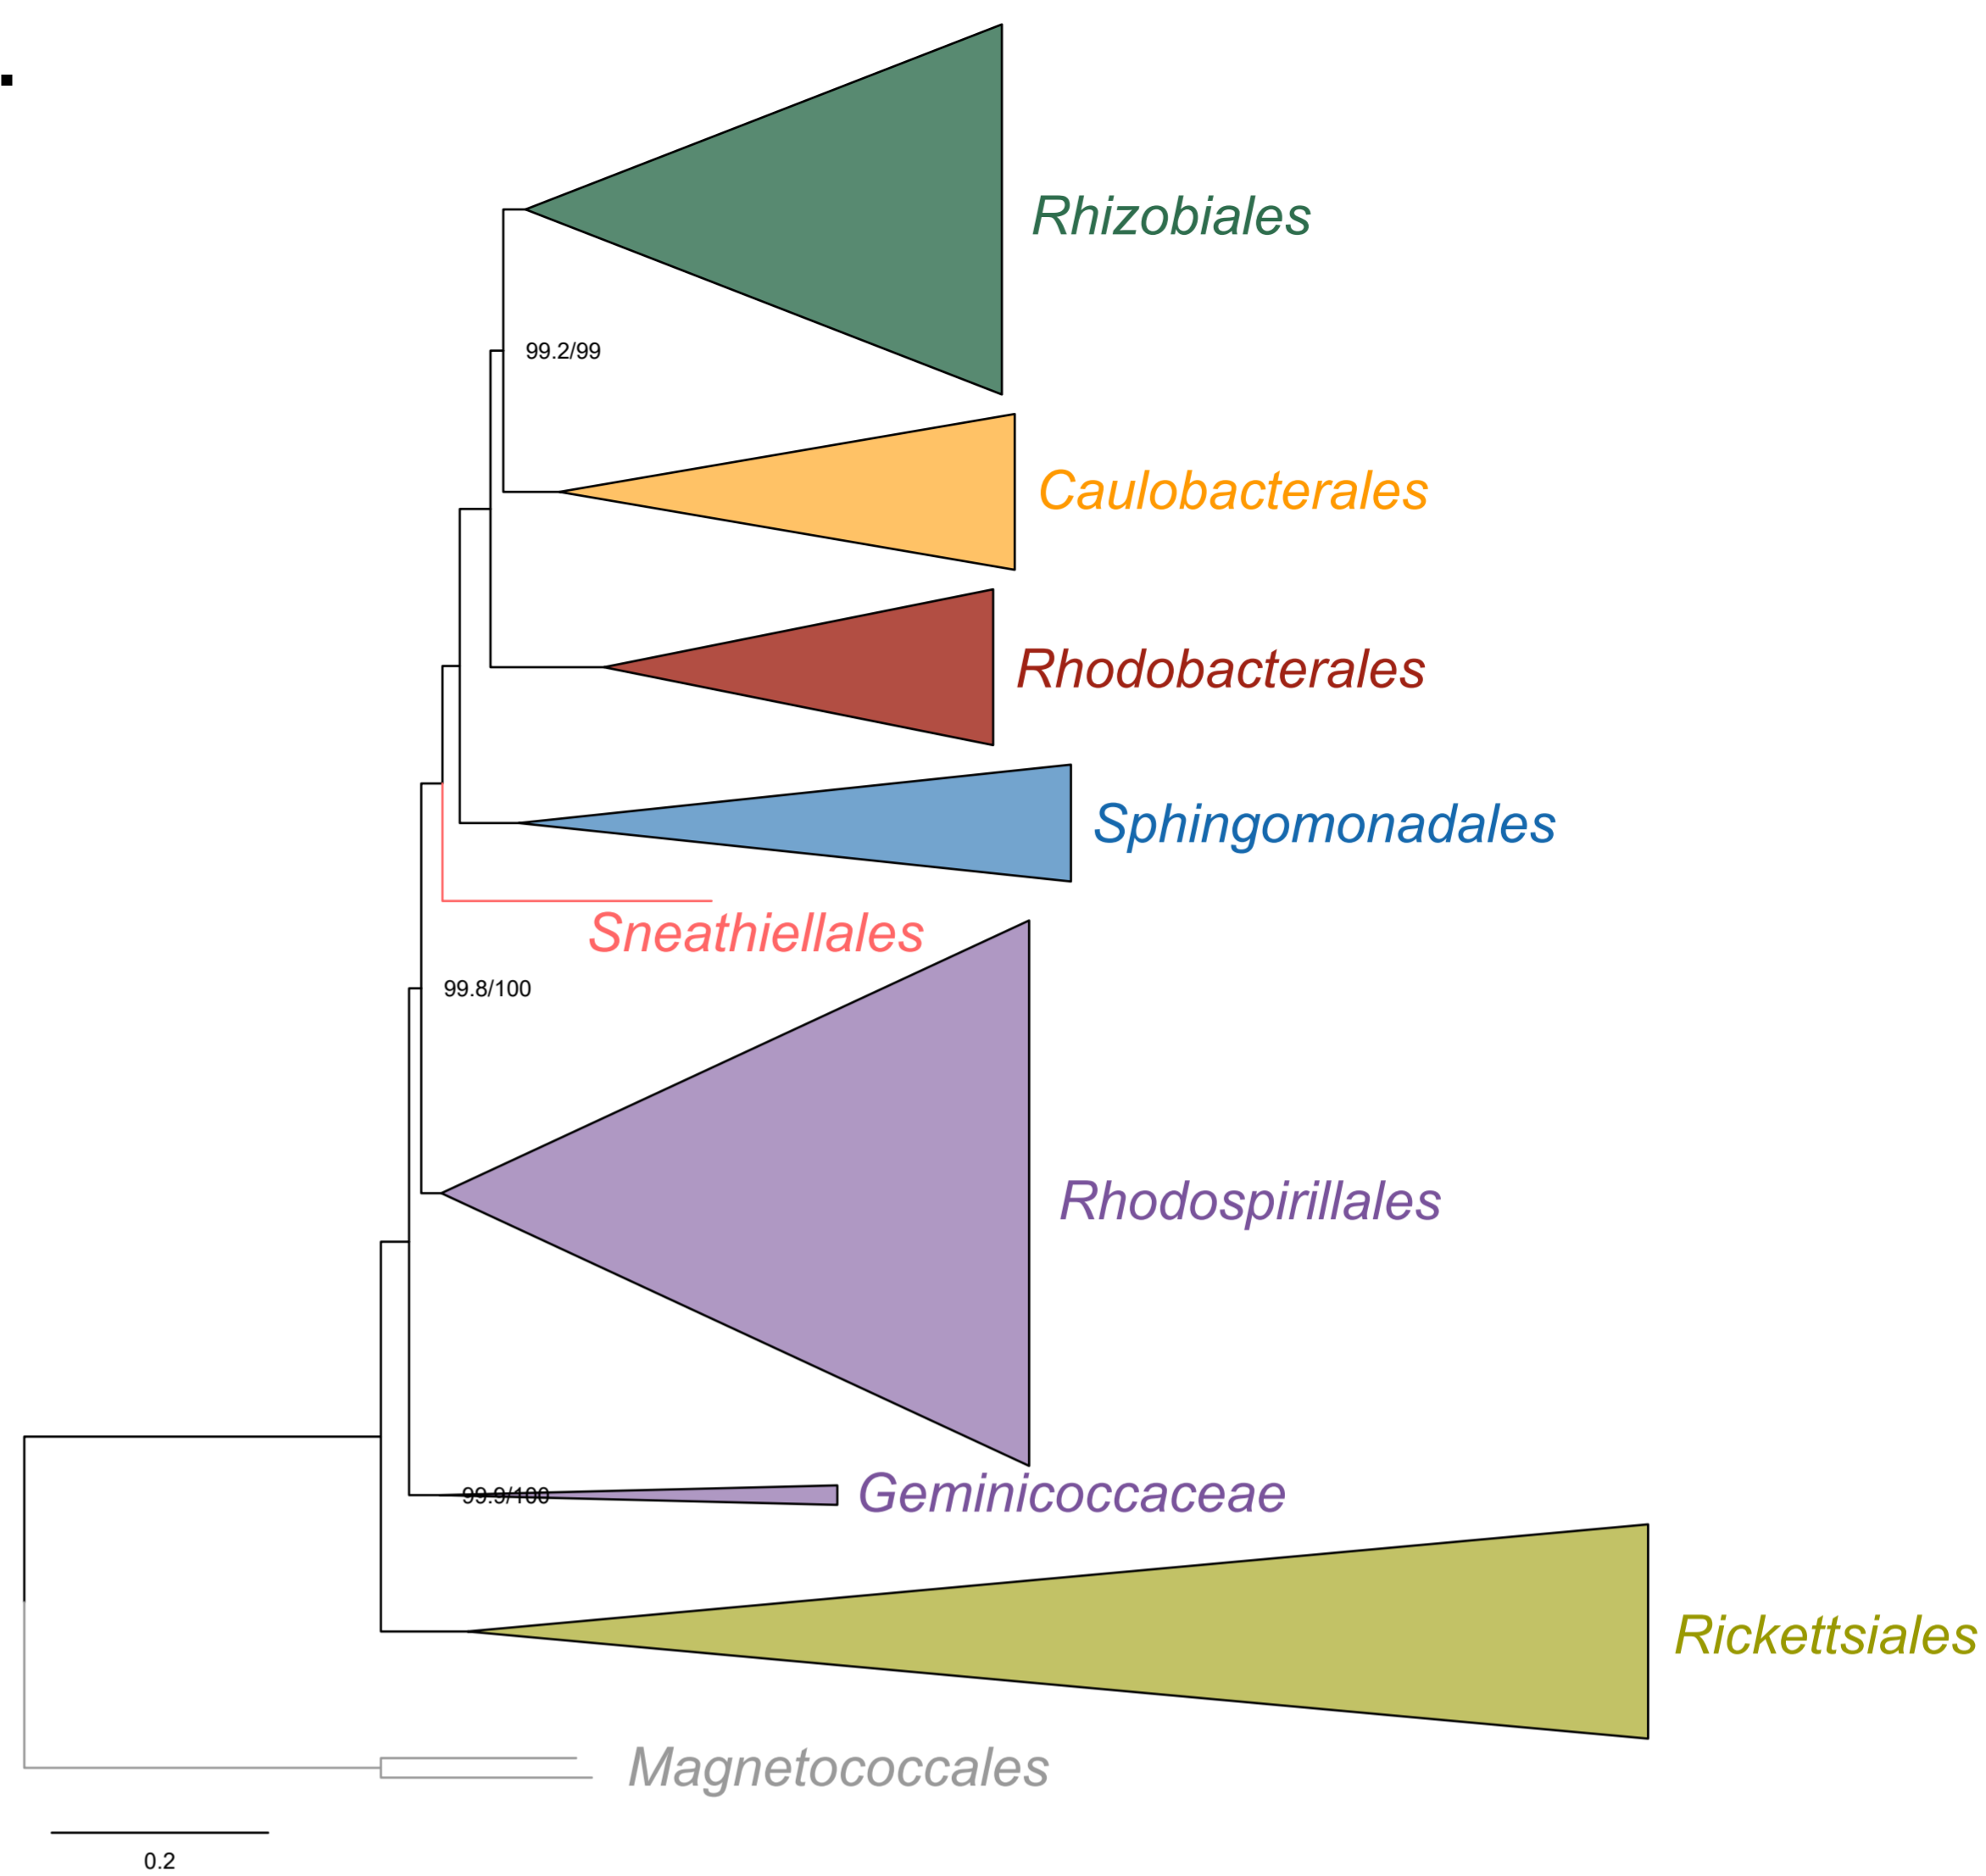

C.

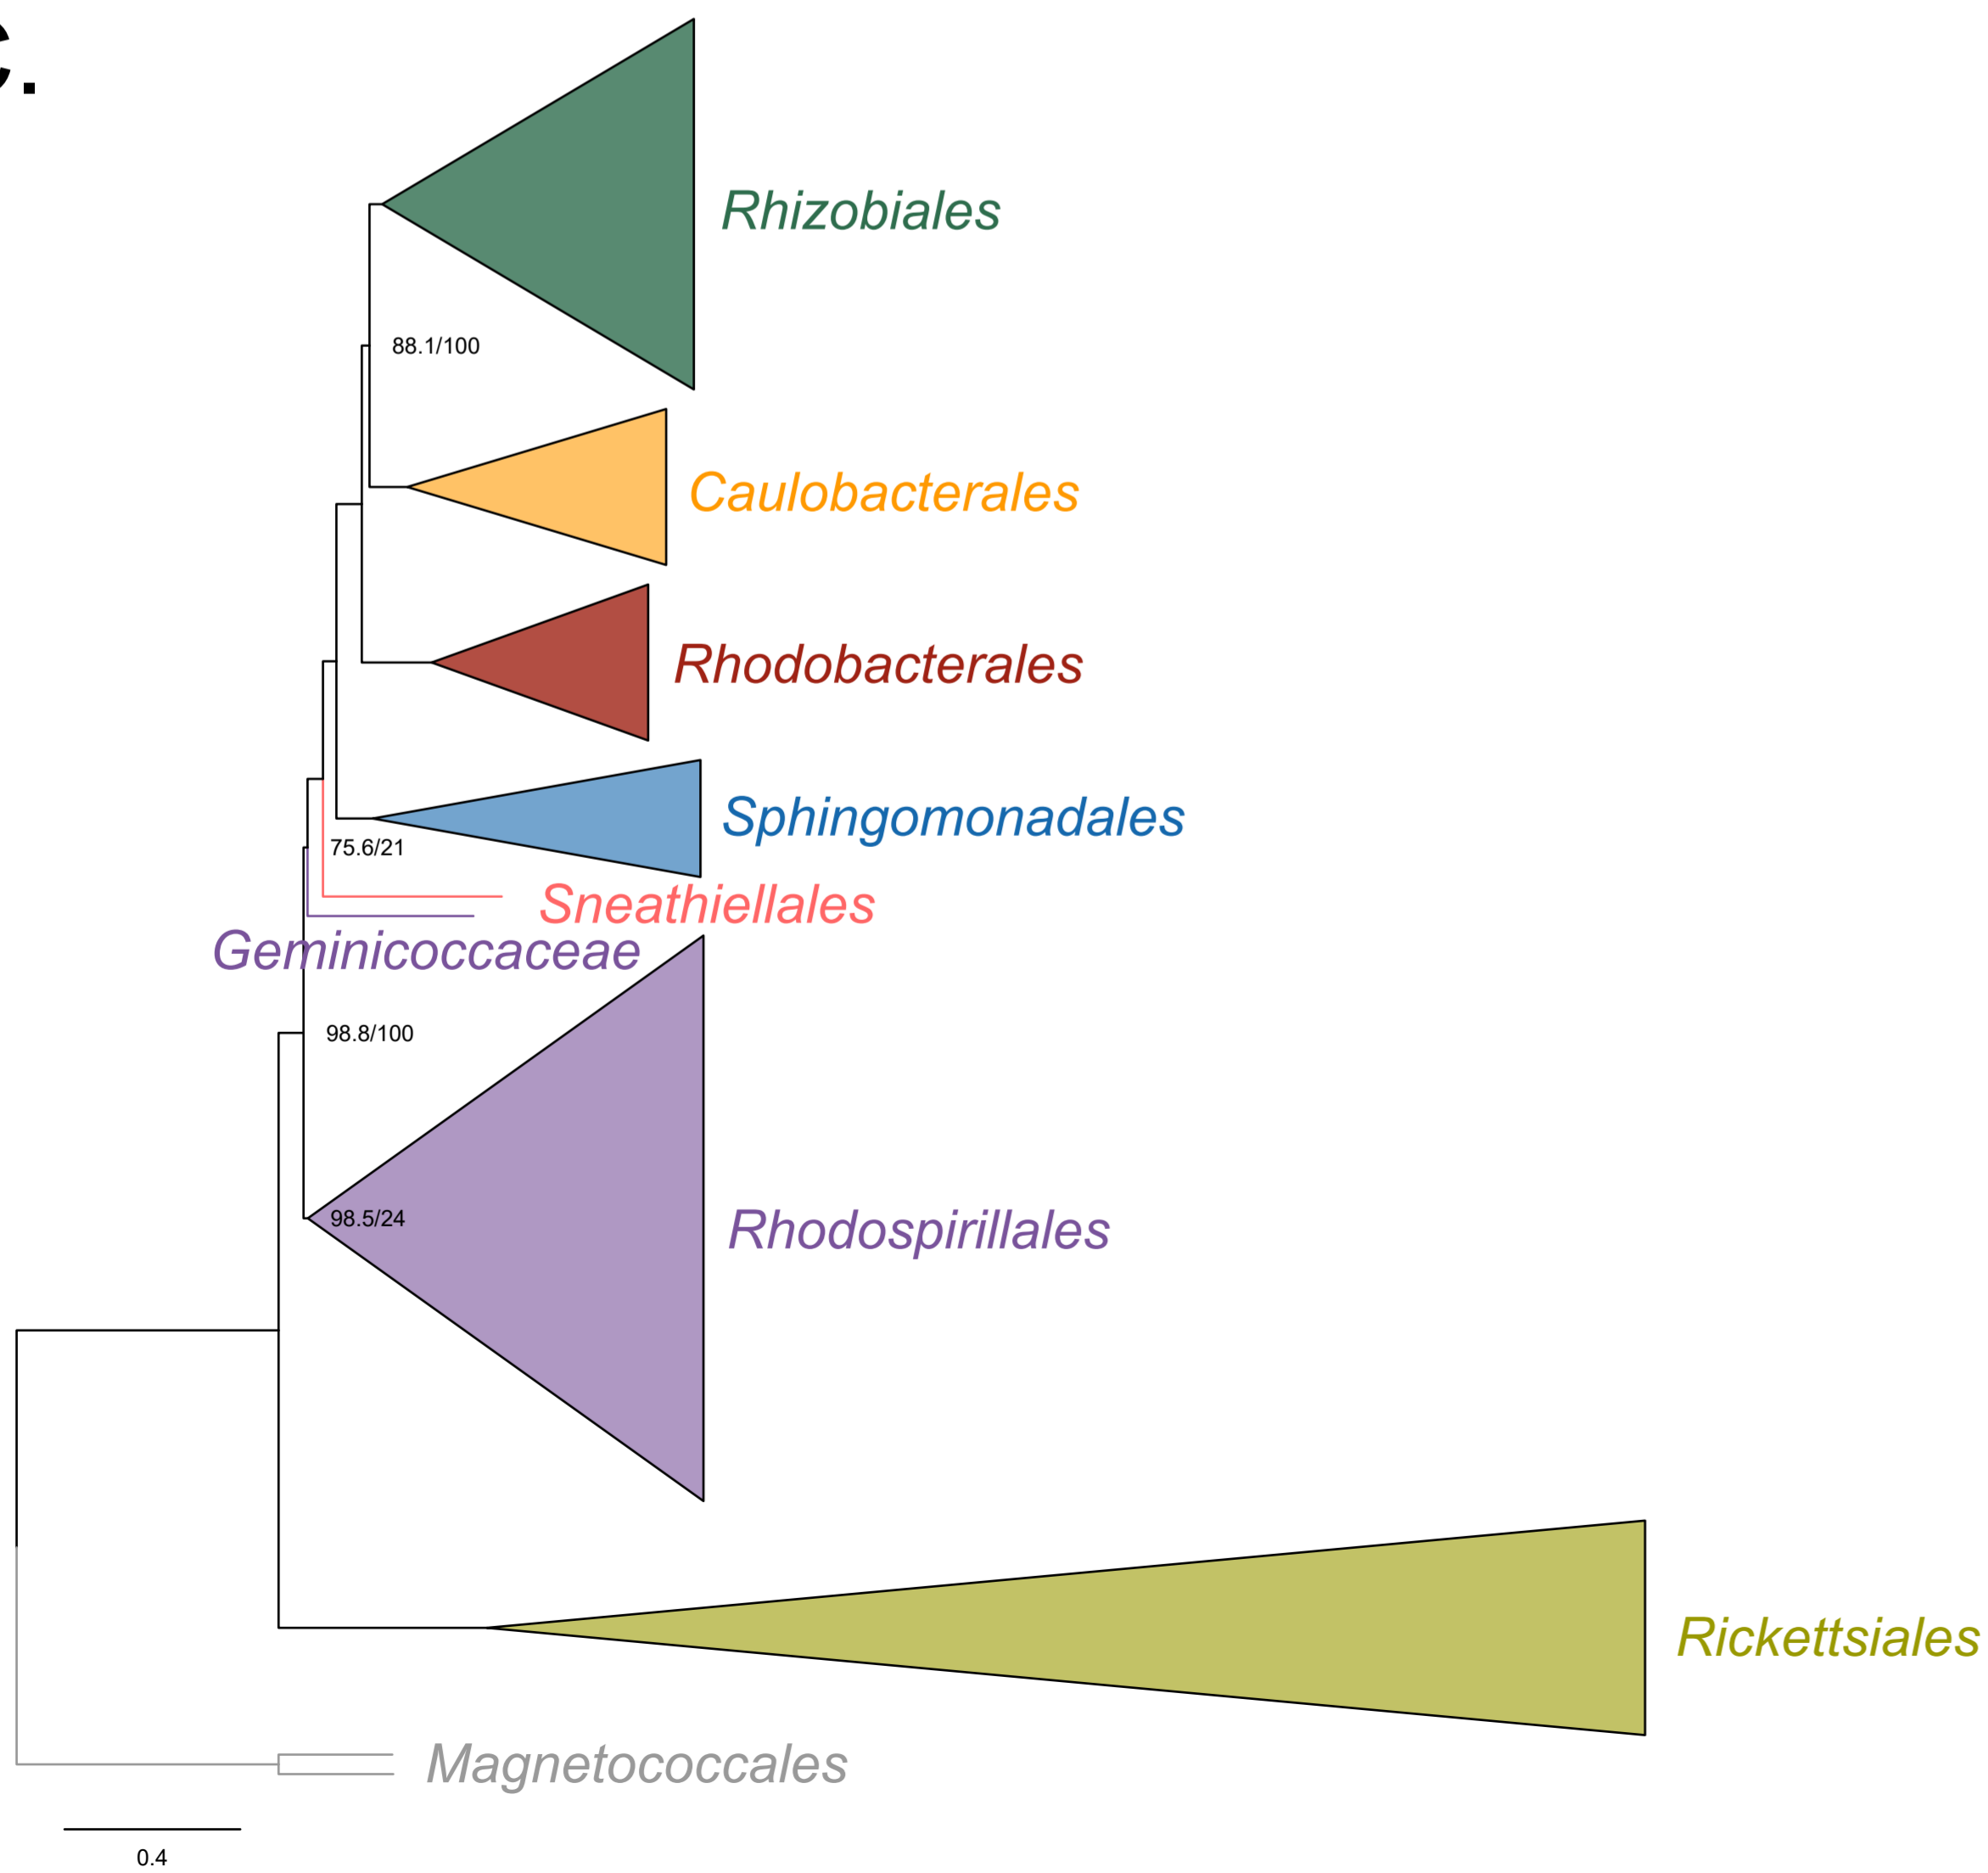

D.

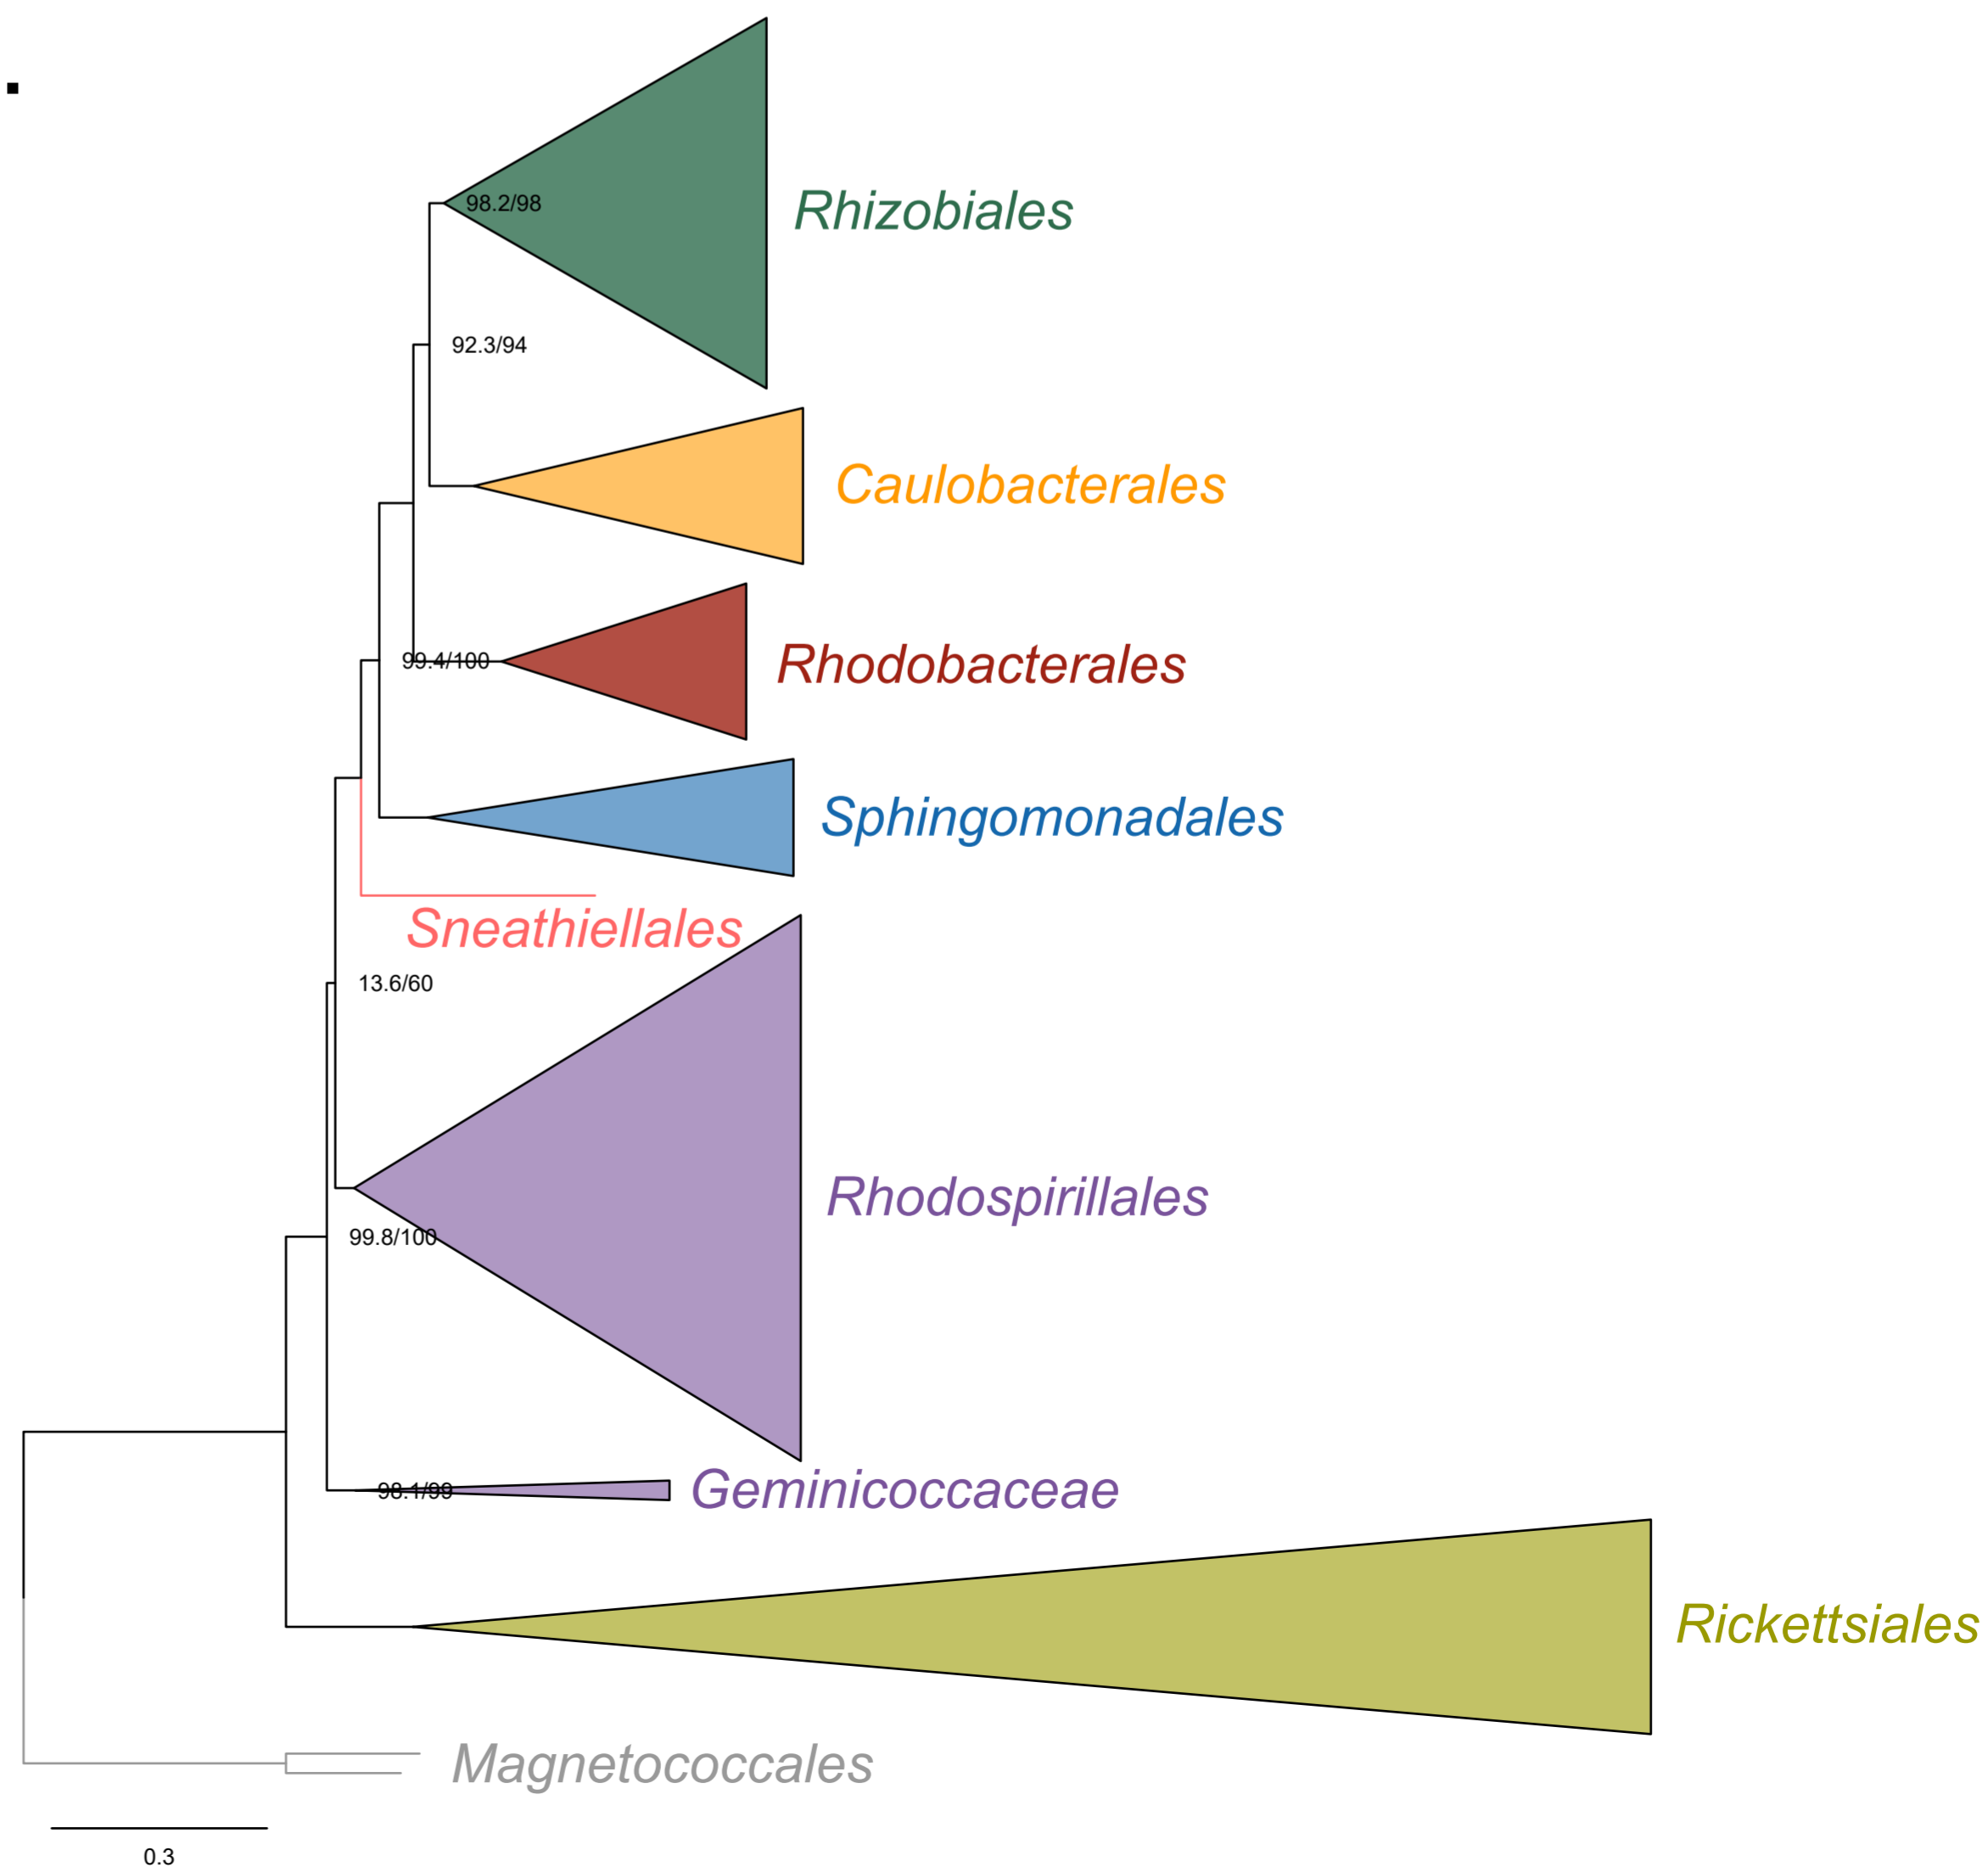

Supplement: supp [file elife-42535-supp-v2.zip › elife_poa_e42535_Figure_3_figure_supplement_3.pdf]

A.

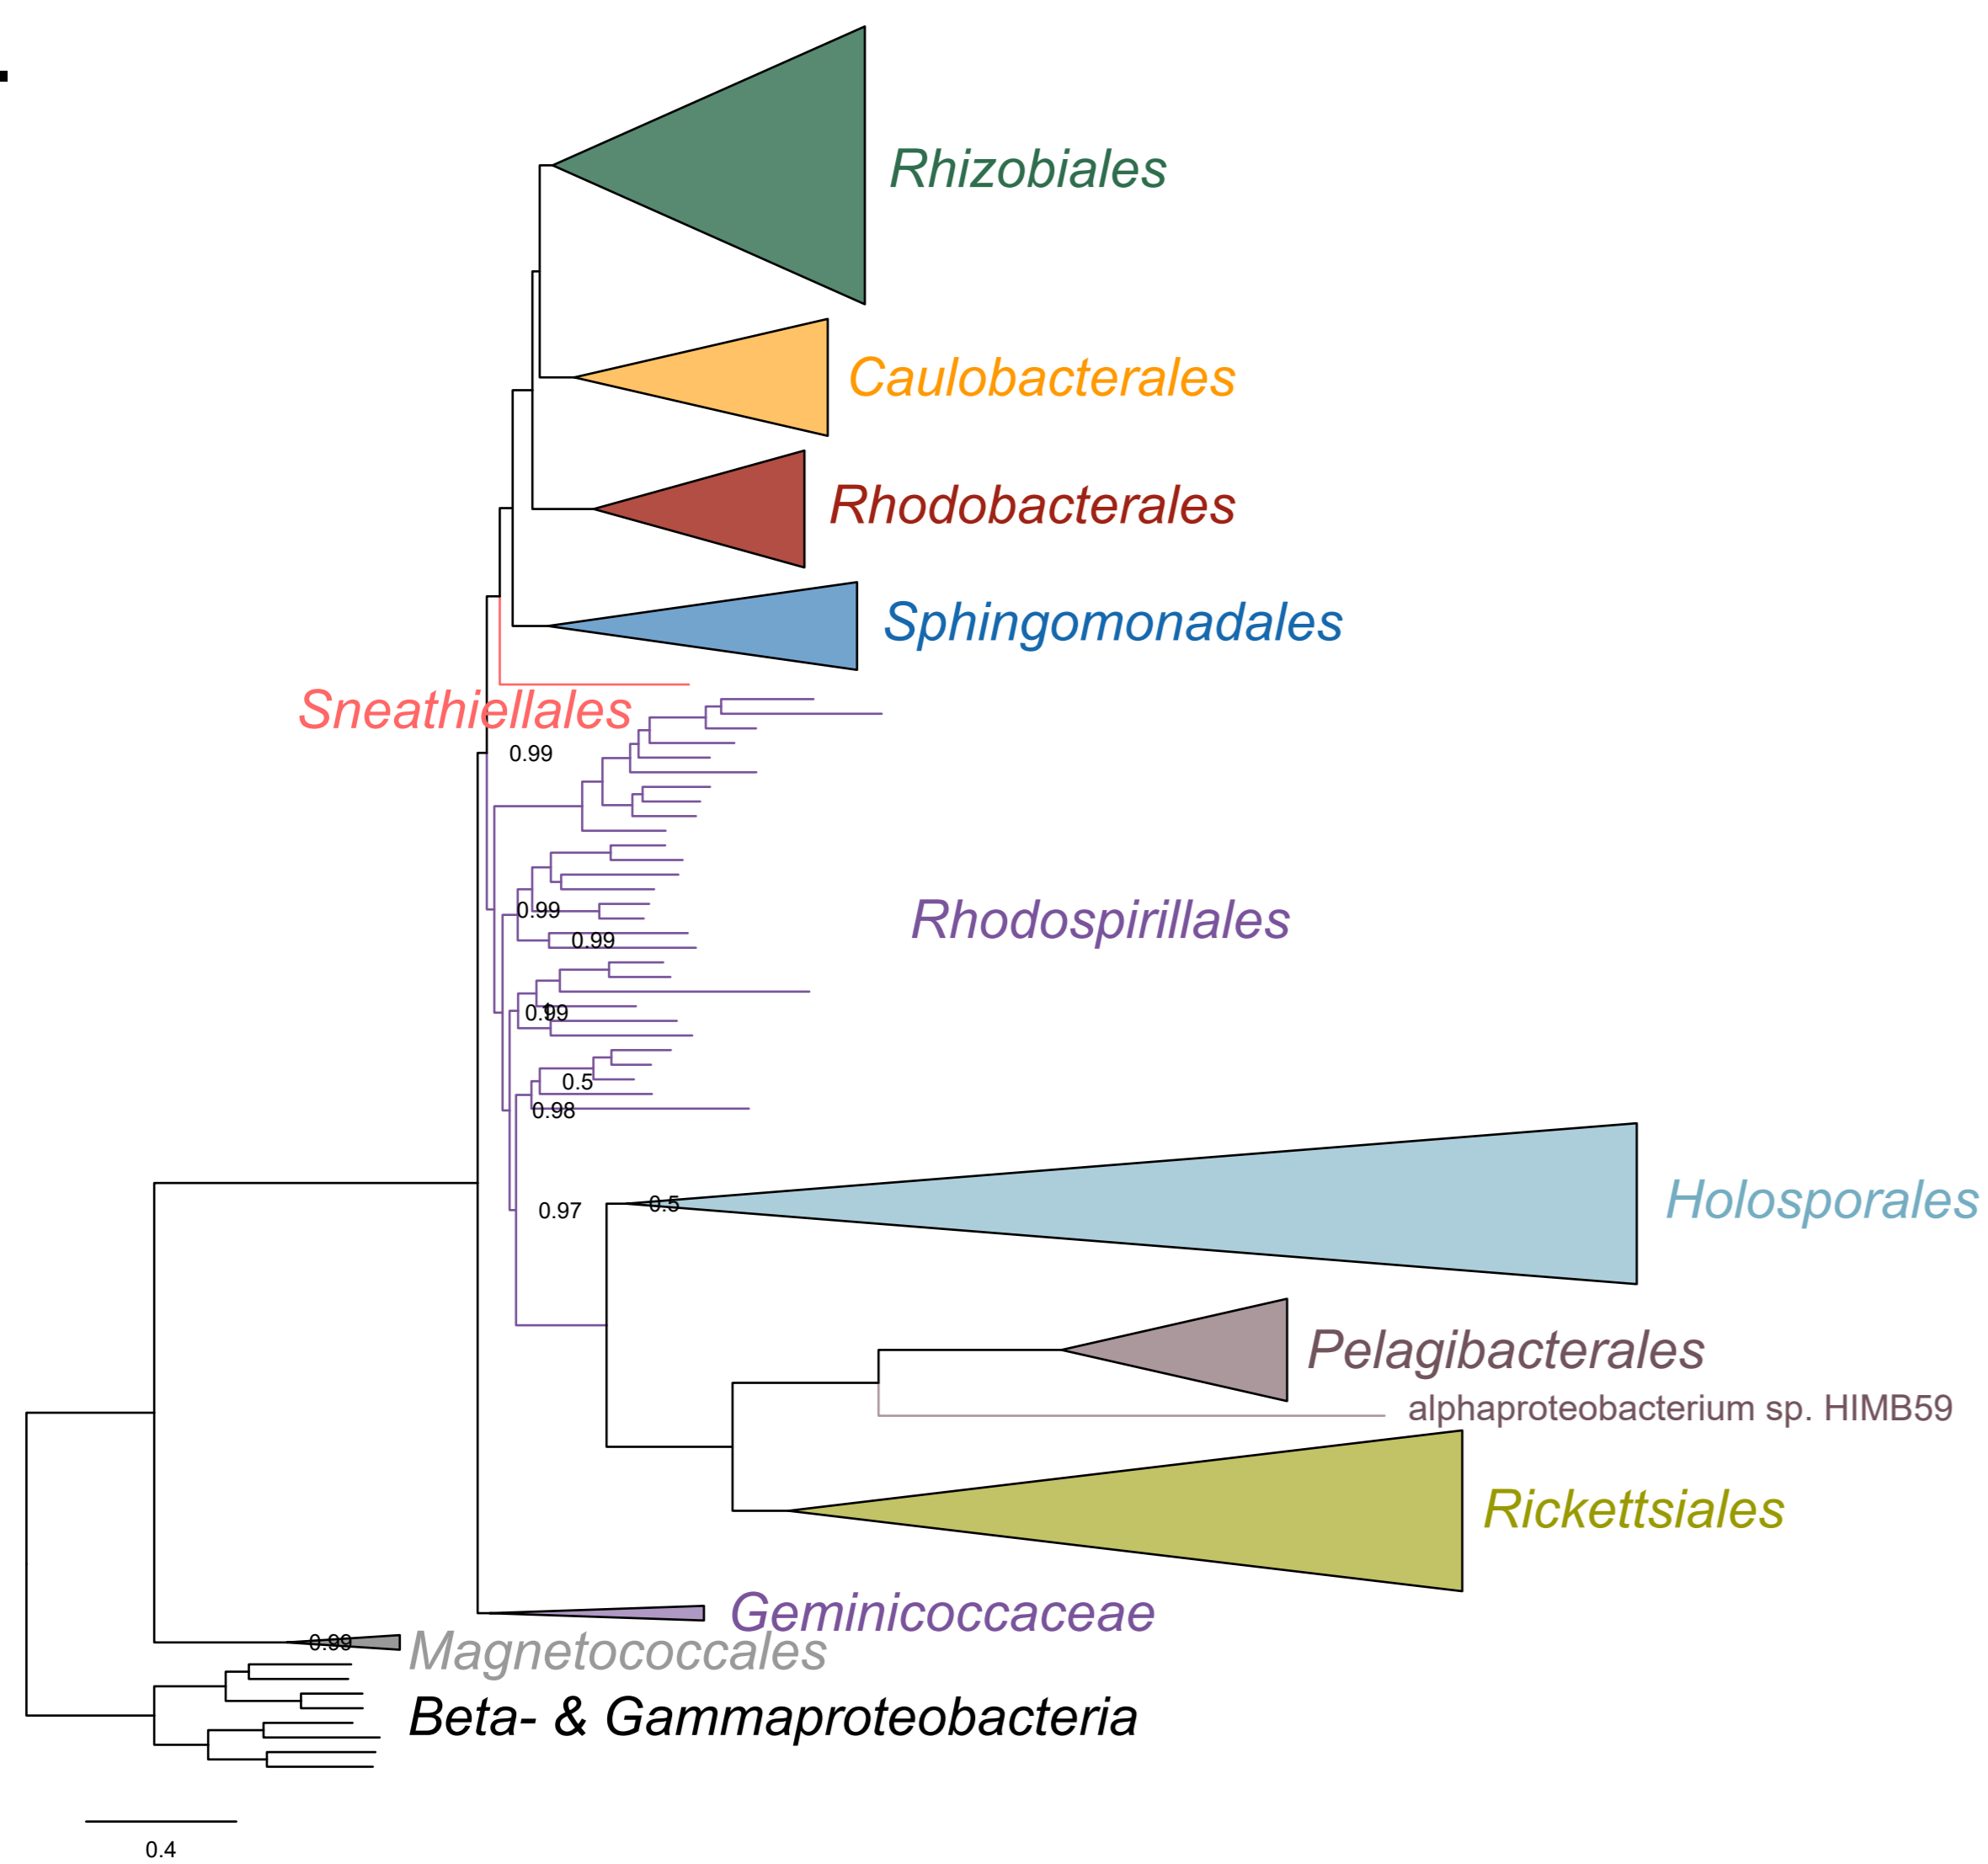

B.

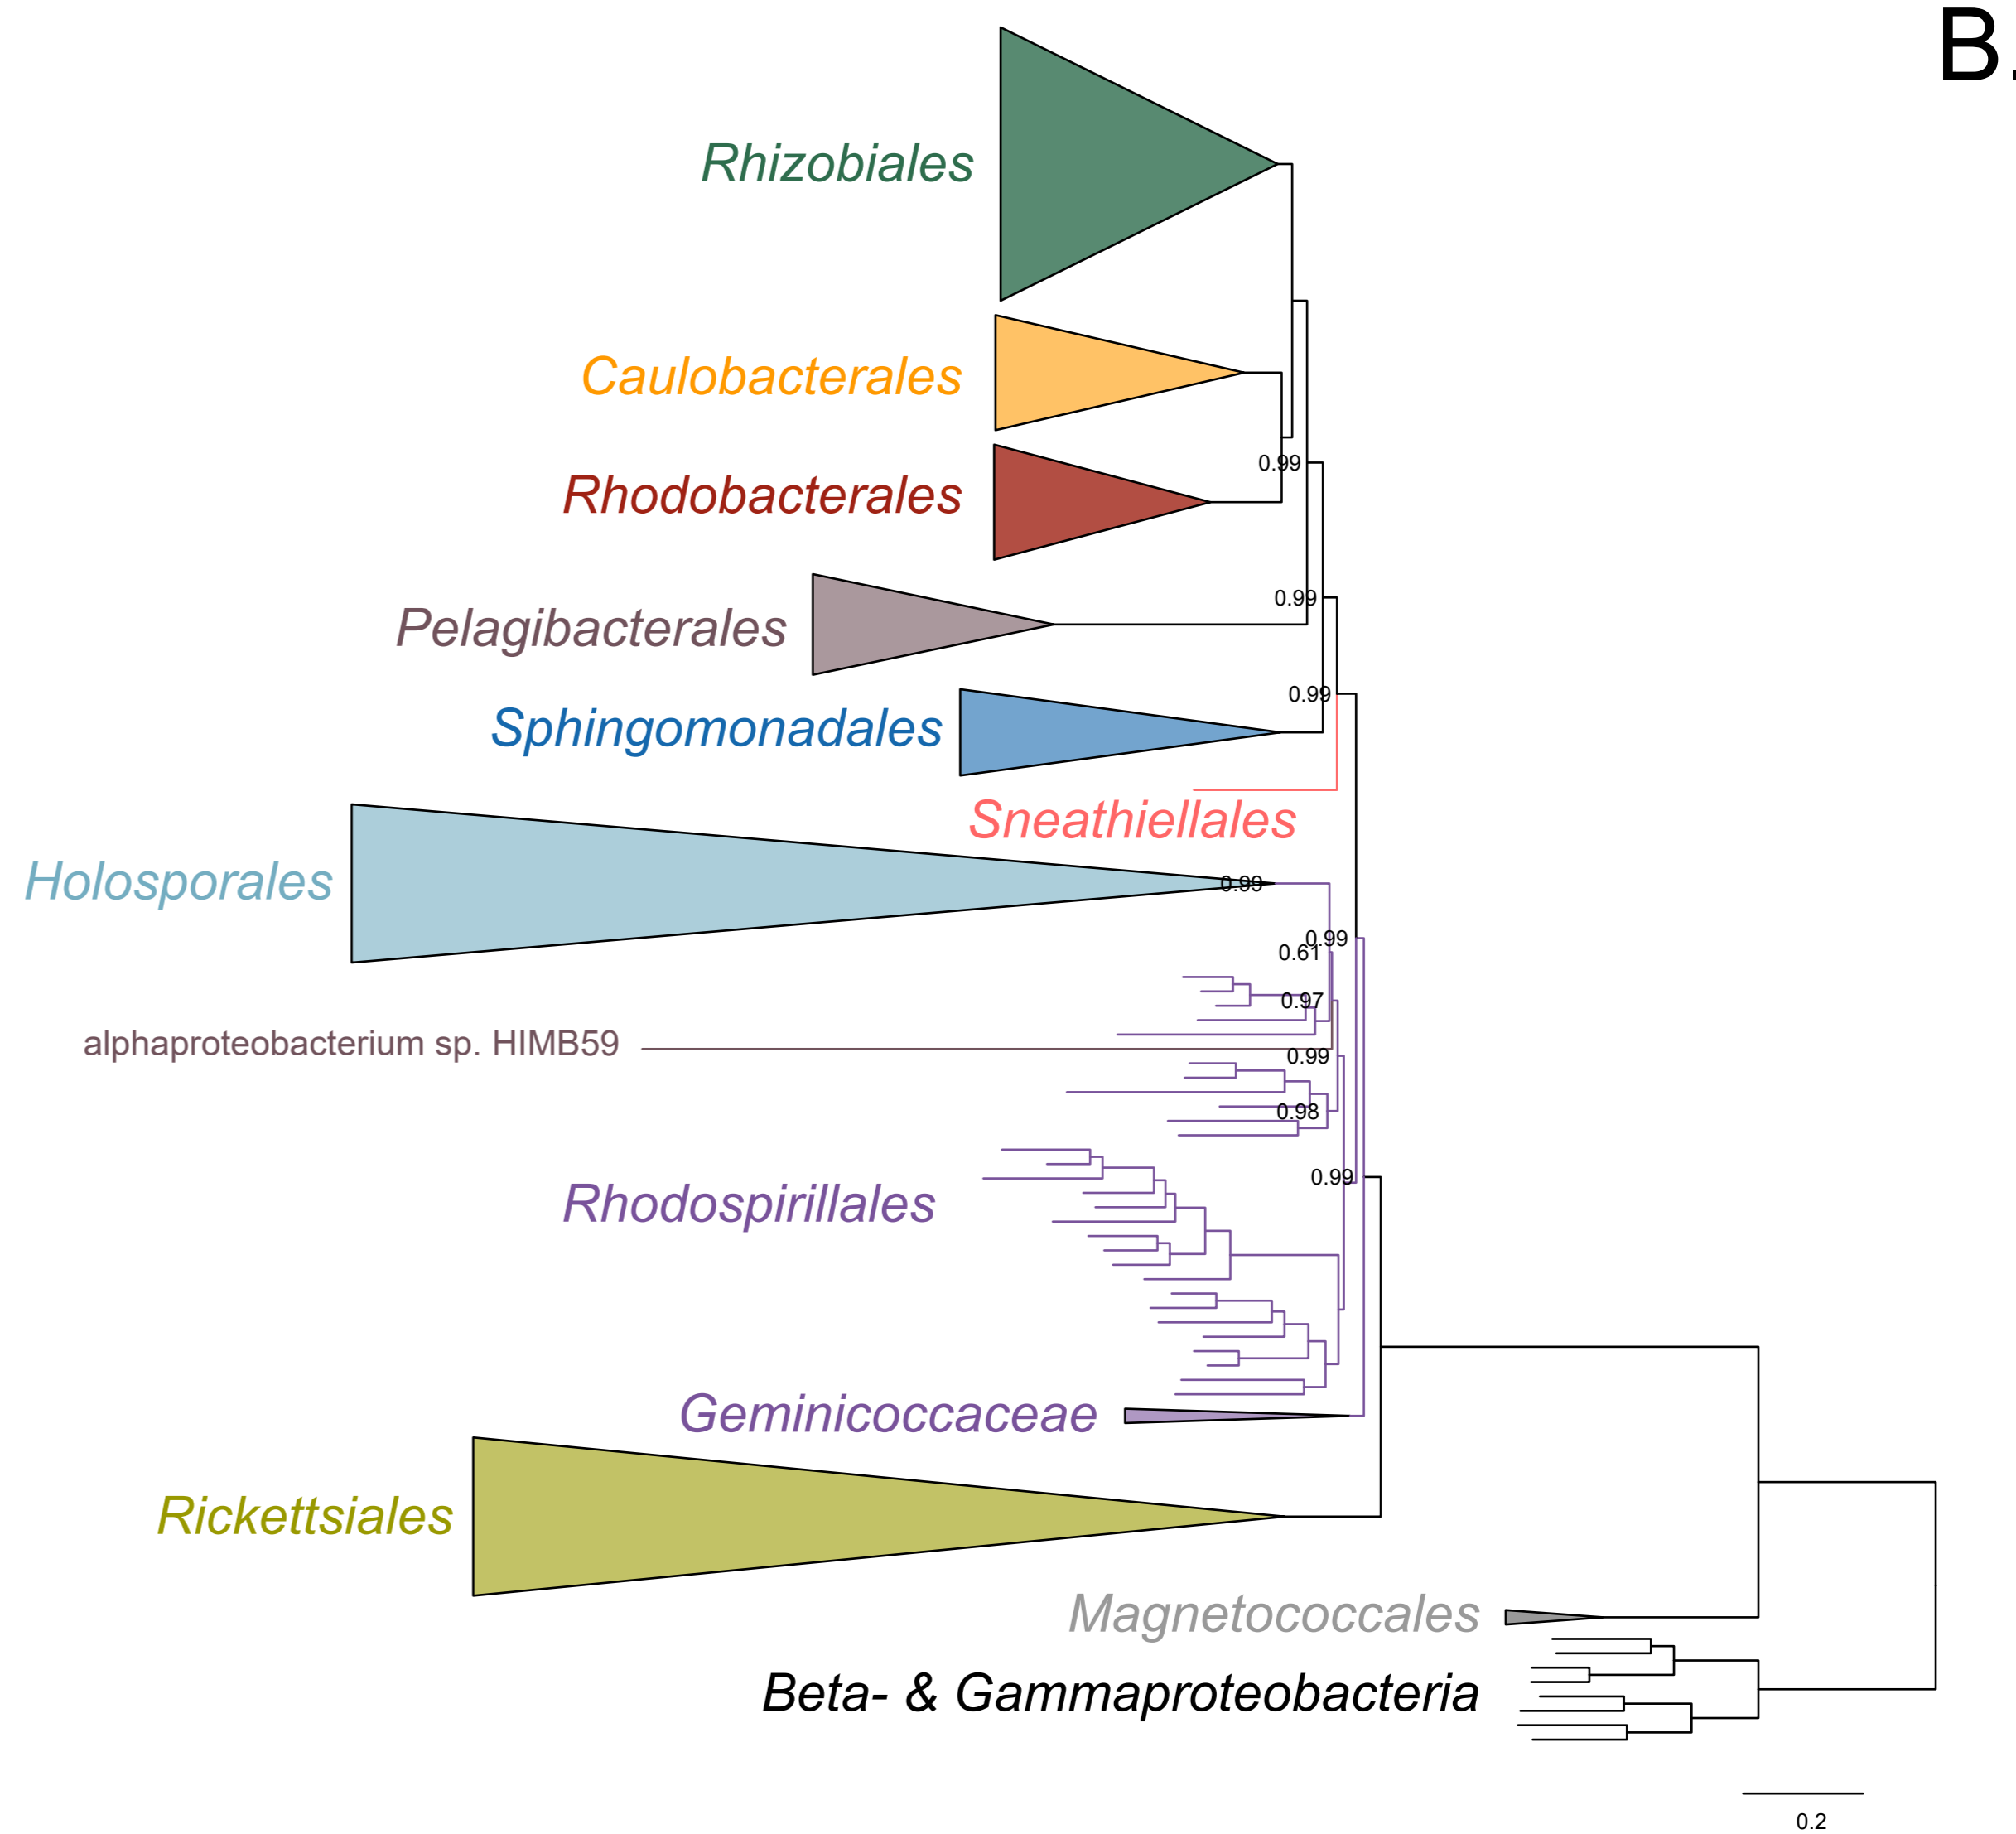

Supplement: supp [file elife-42535-supp-v2.zip › elife_poa_e42535_Figure_2_figure_supplement_3.pdf]

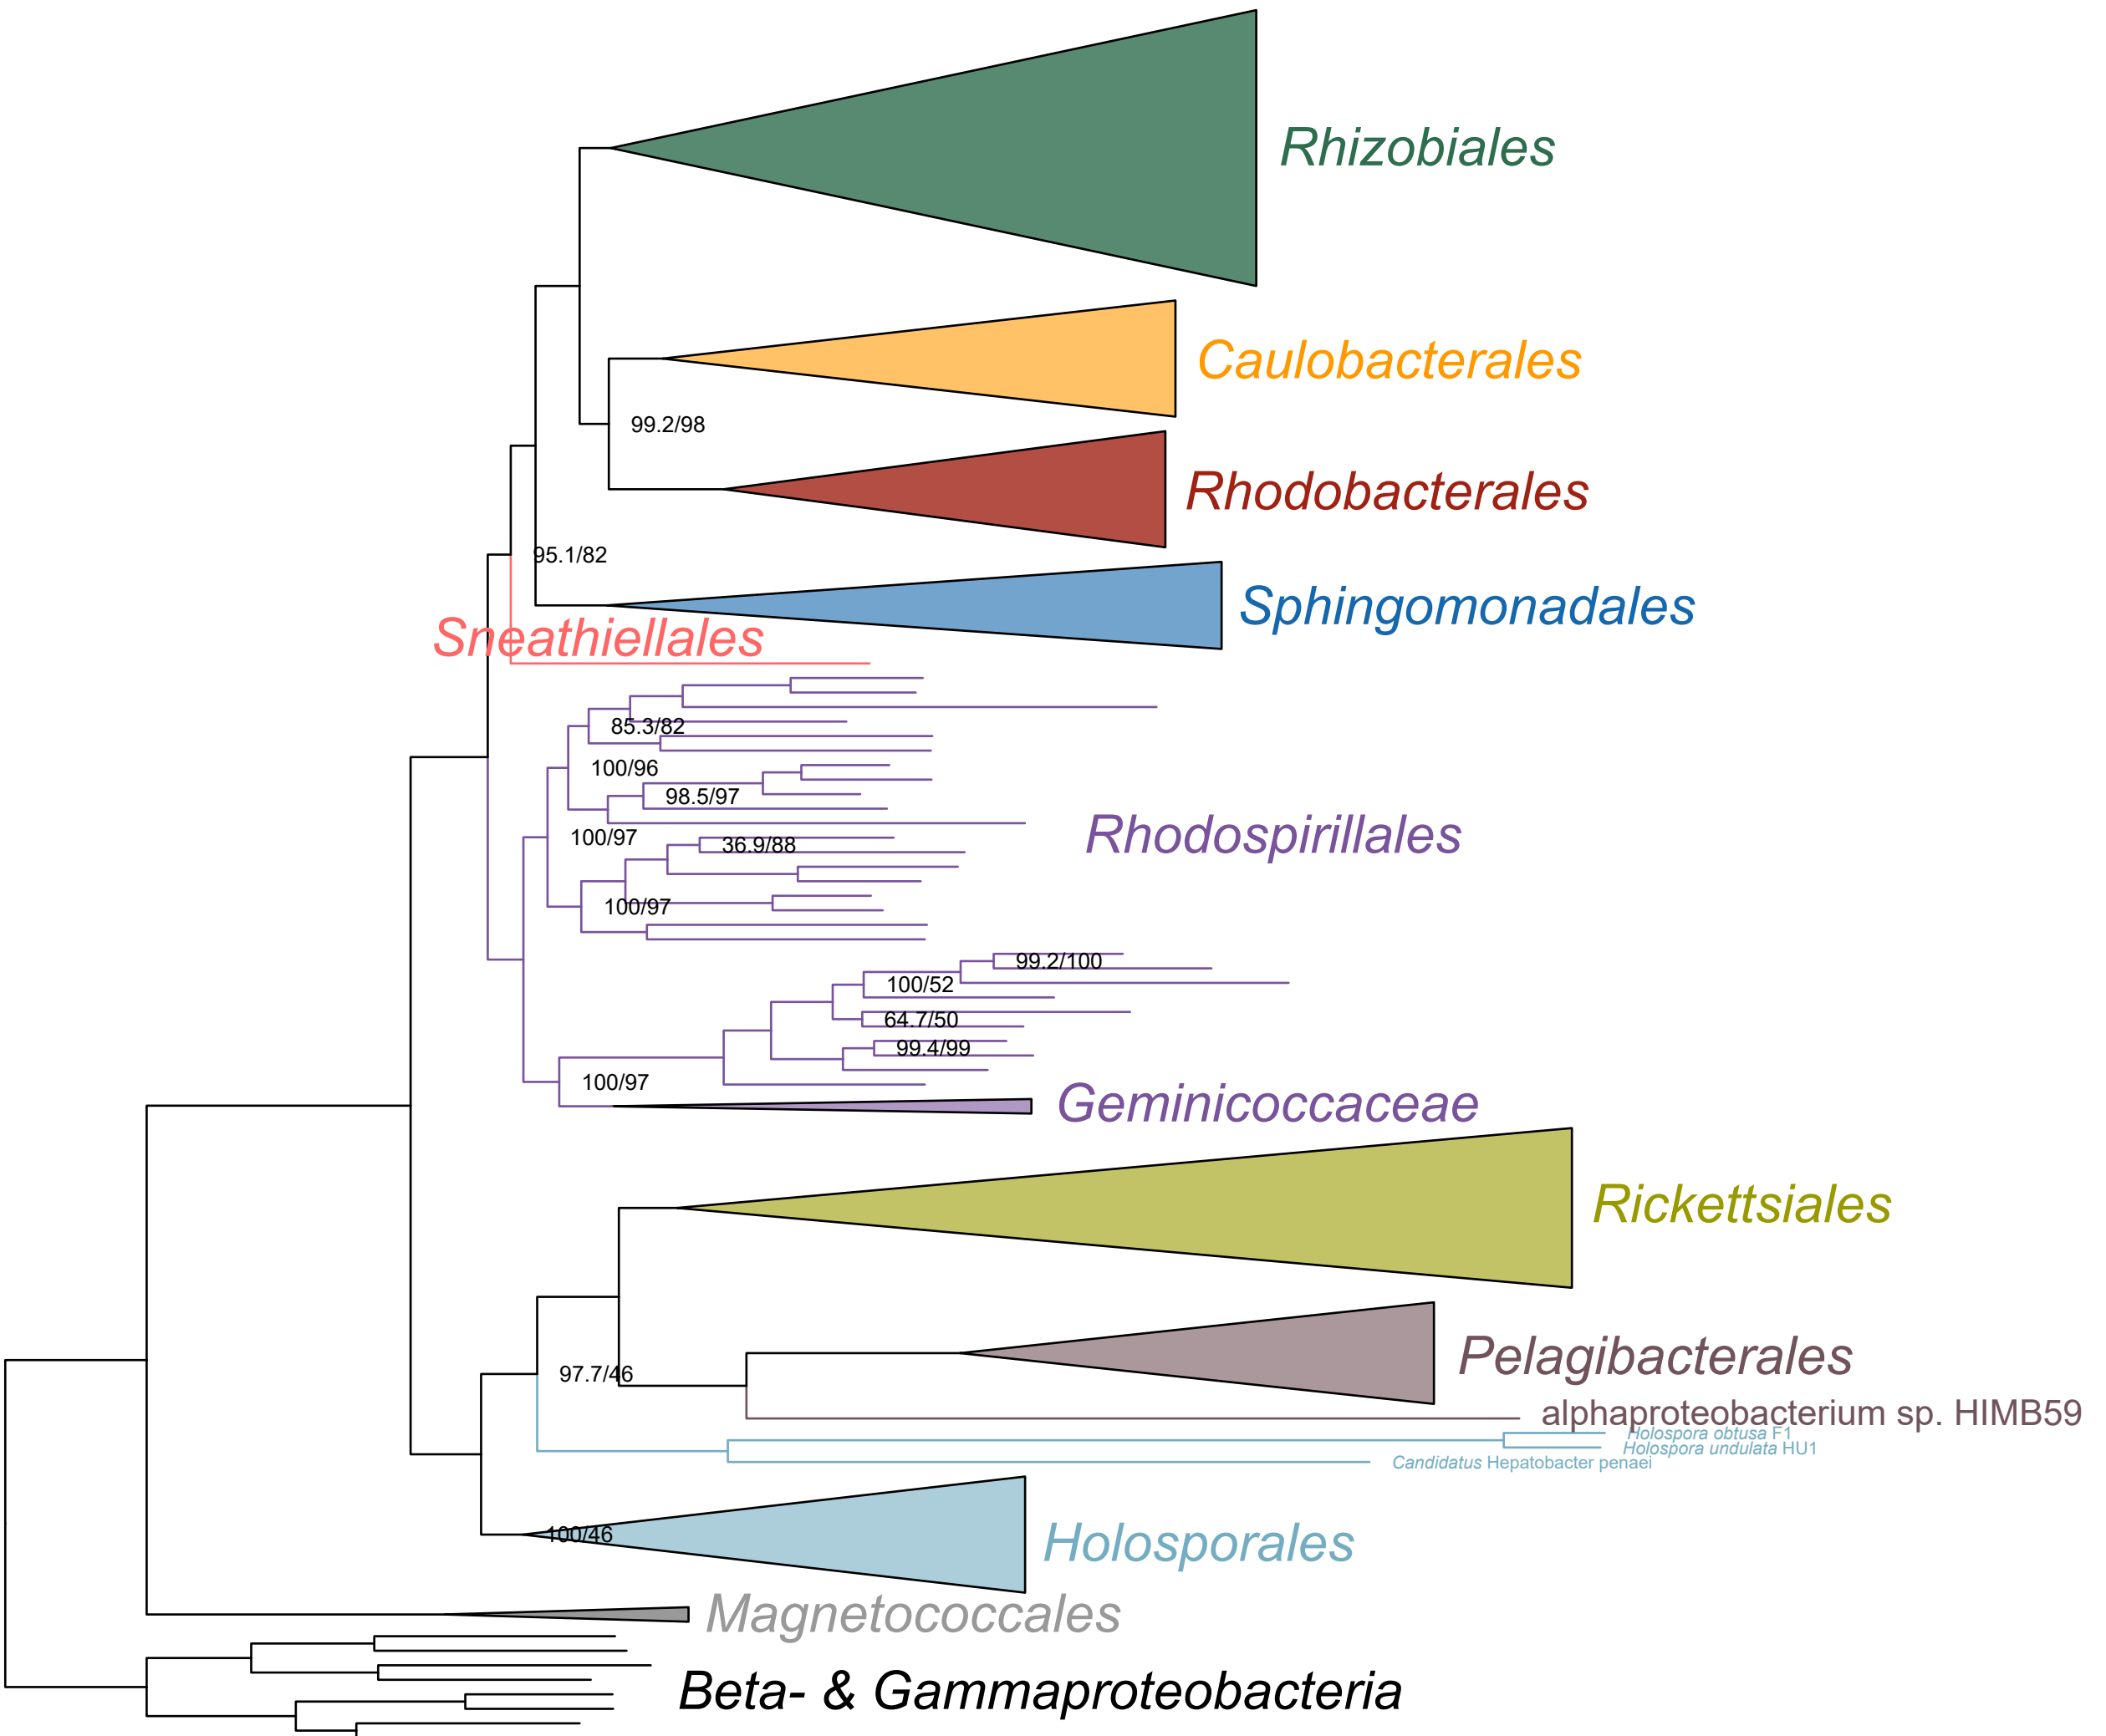

Supplement: supp [file elife-42535-supp-v2.zip › elife_poa_e42535_Figure_2_figure_supplement_5.pdf]

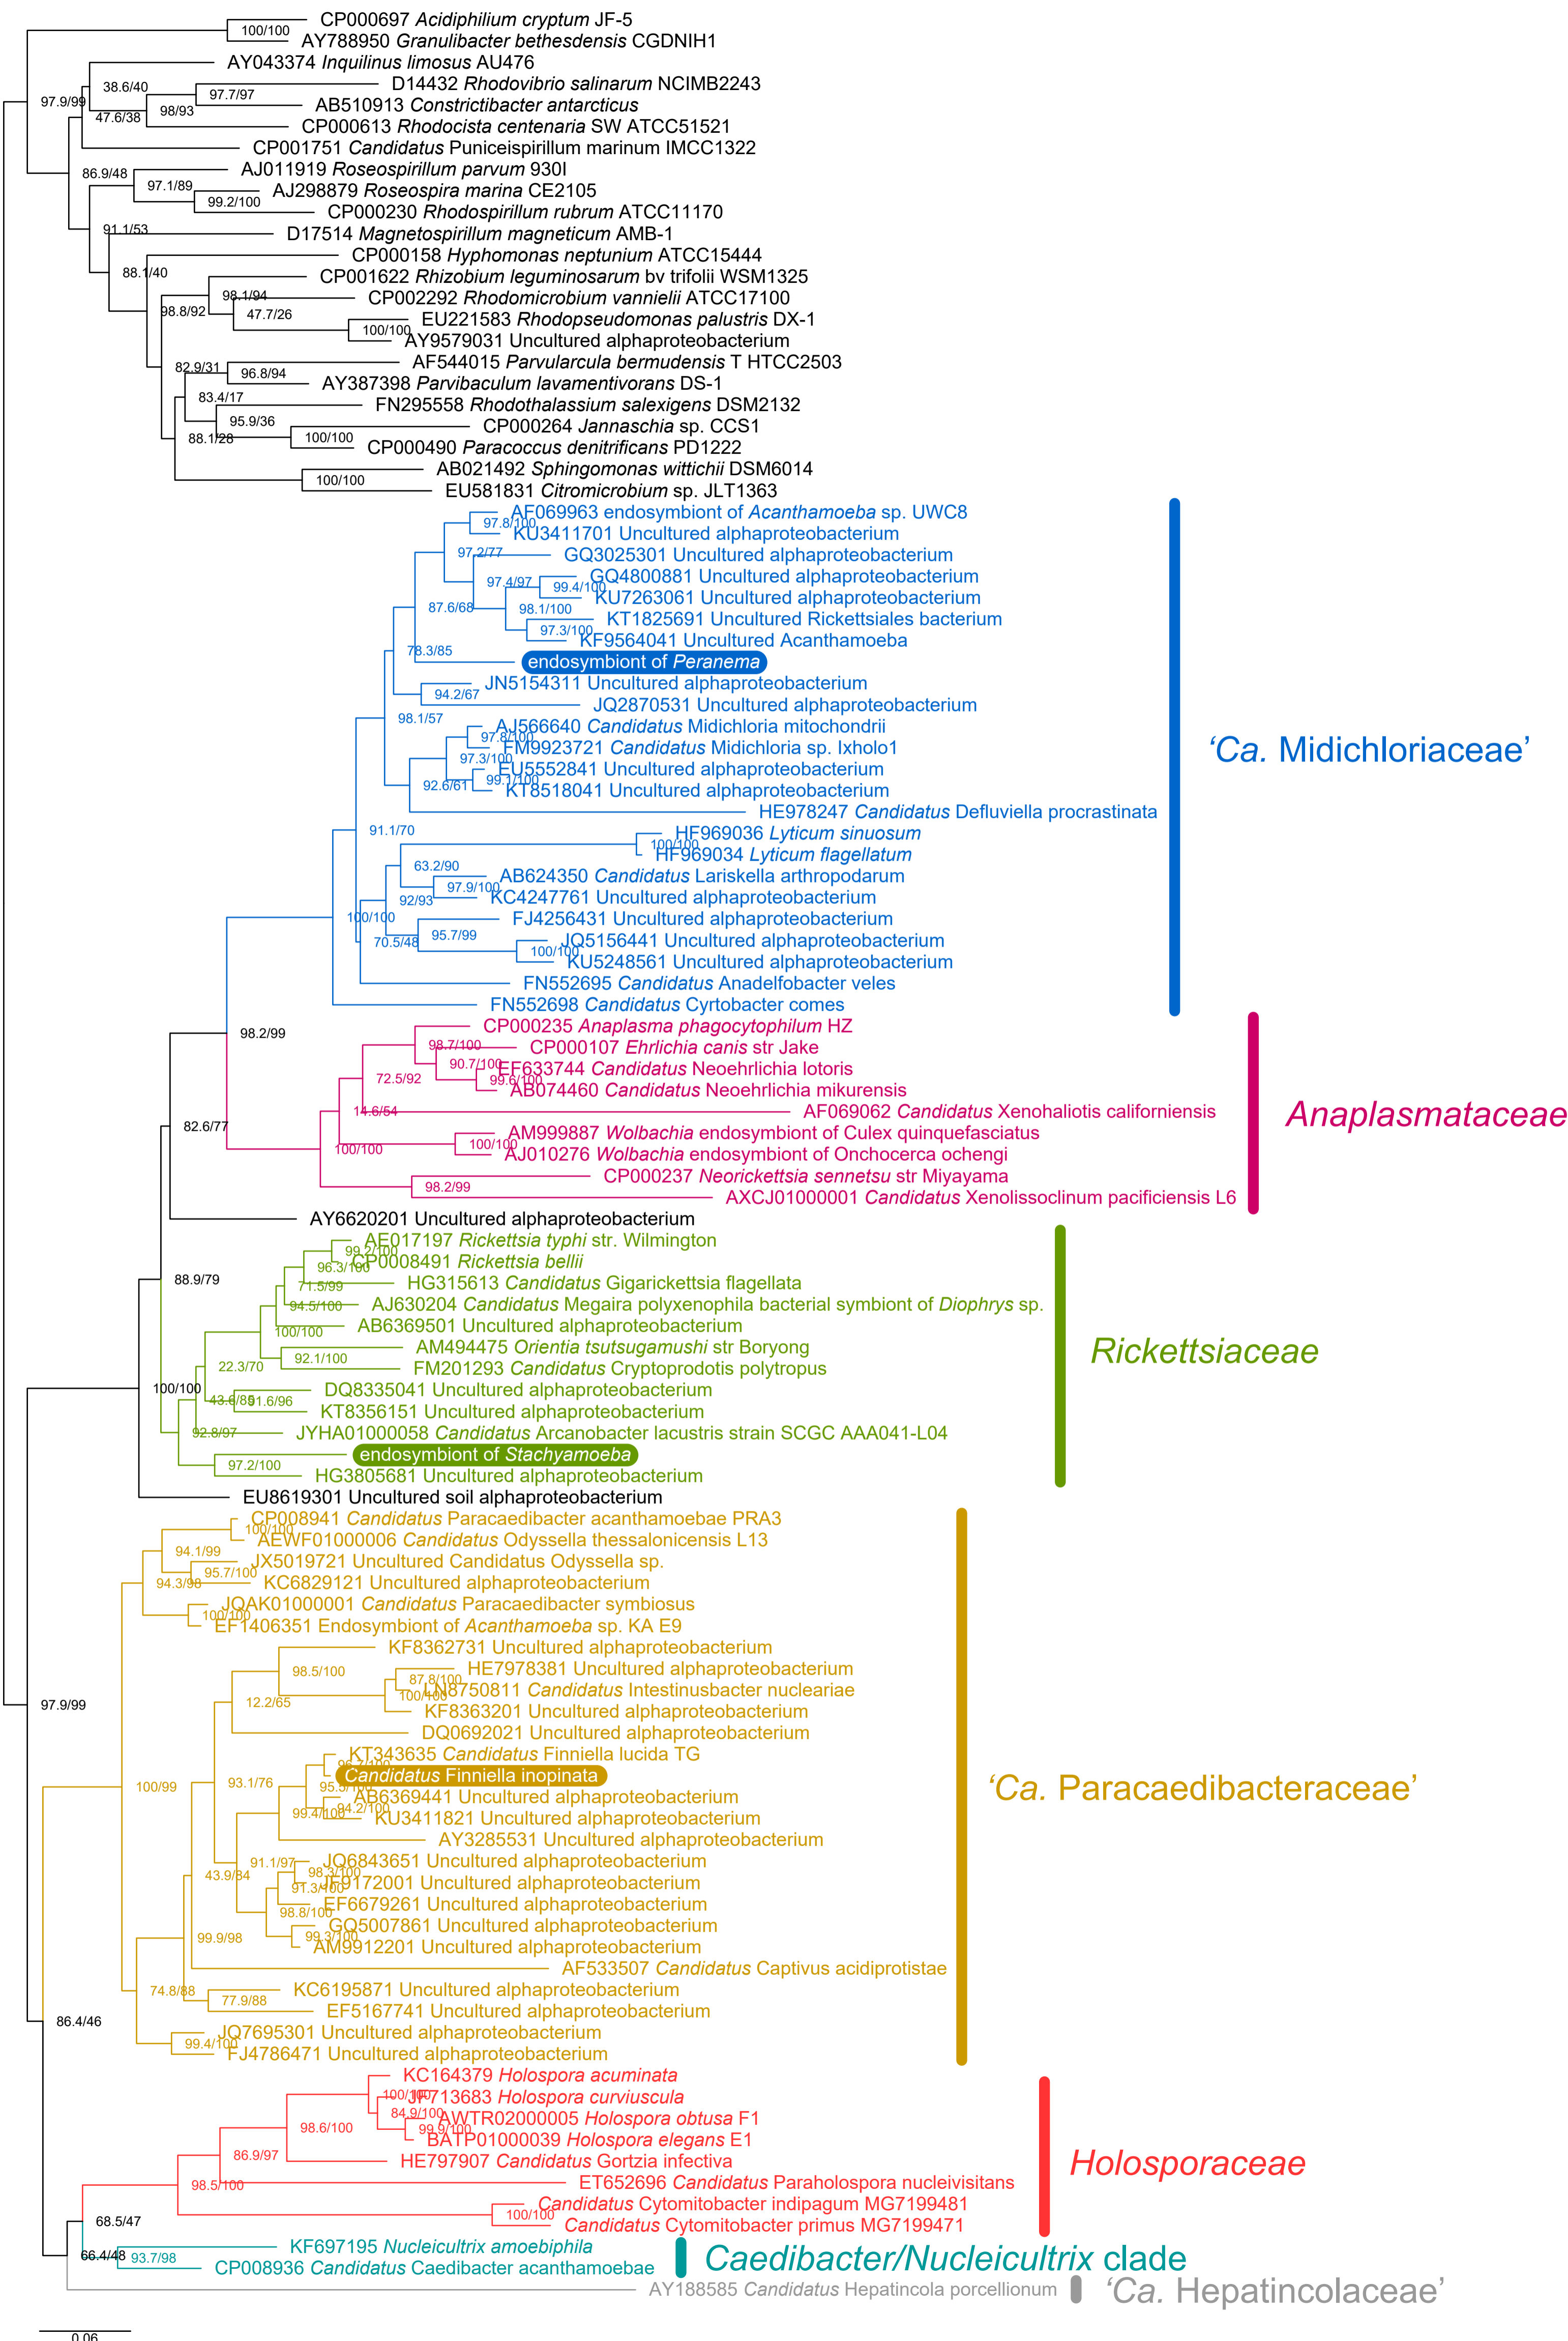

Supplement: supp [file elife-42535-supp-v2.zip › elife_poa_e42535_Supplementary_file_1.pdf]

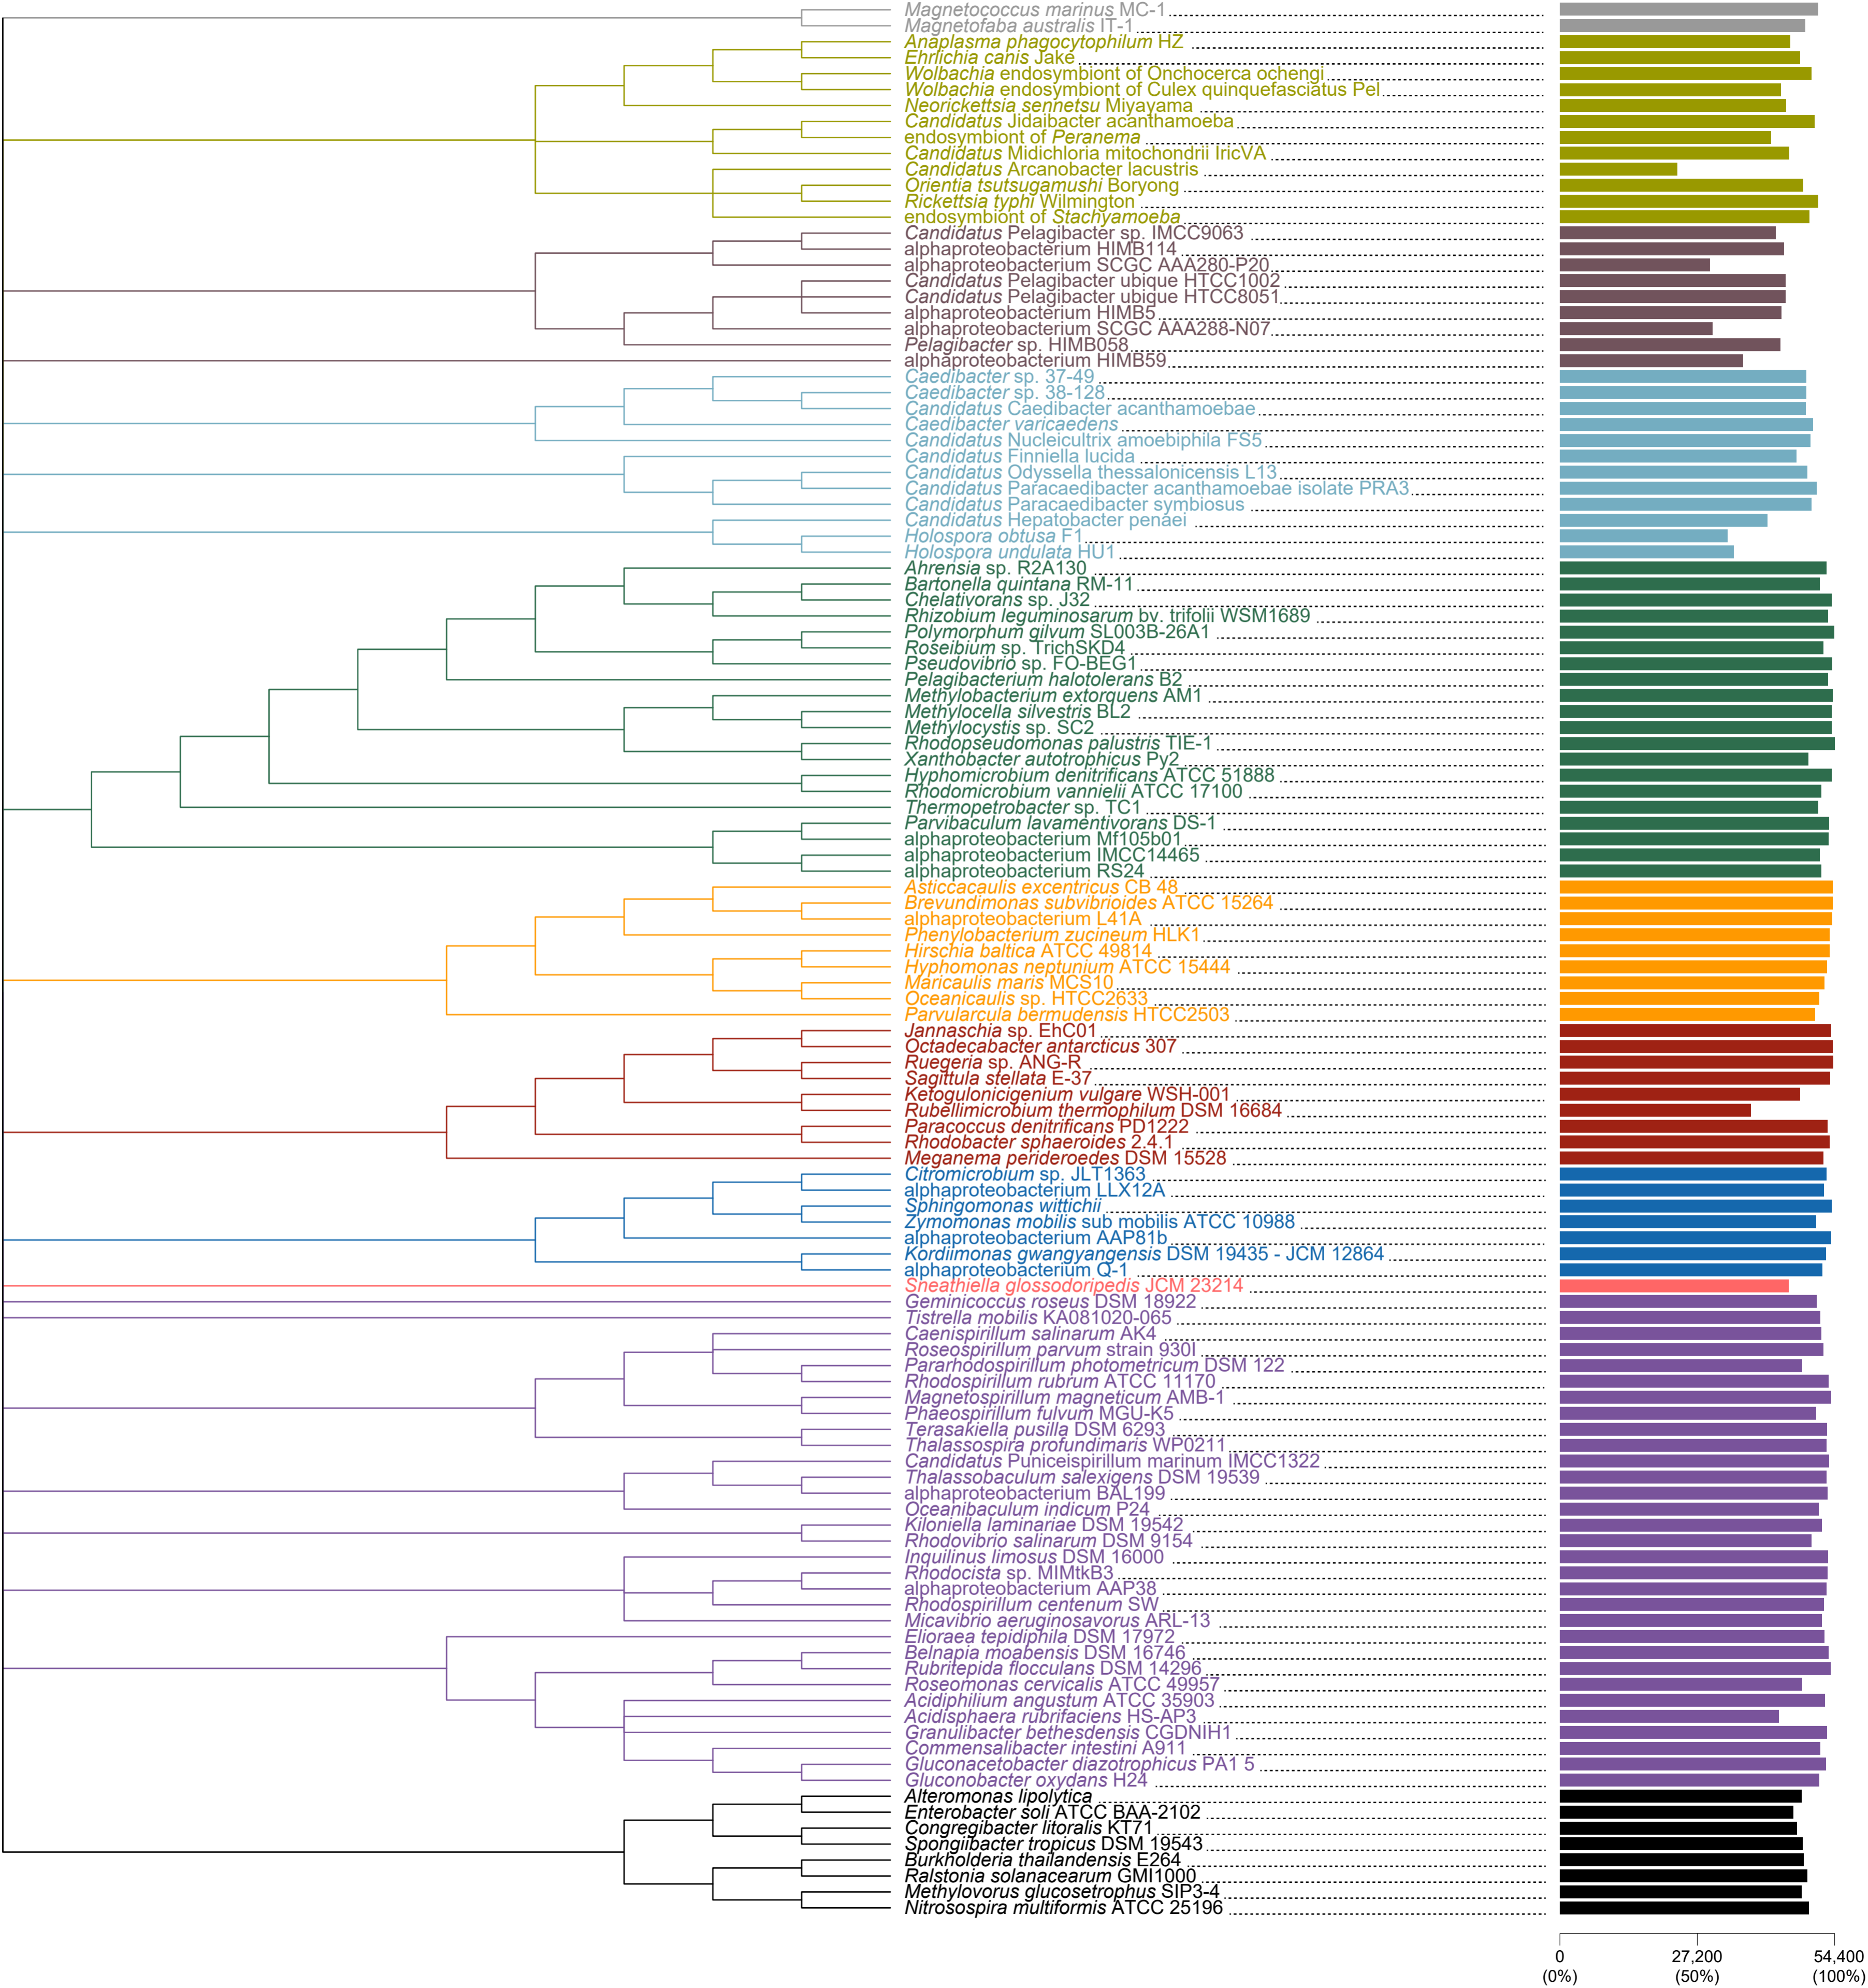

Supplement: supp [file elife-42535-supp-v2.zip › elife_poa_e42535_Figure_2_figure_supplement_6.pdf]

A.

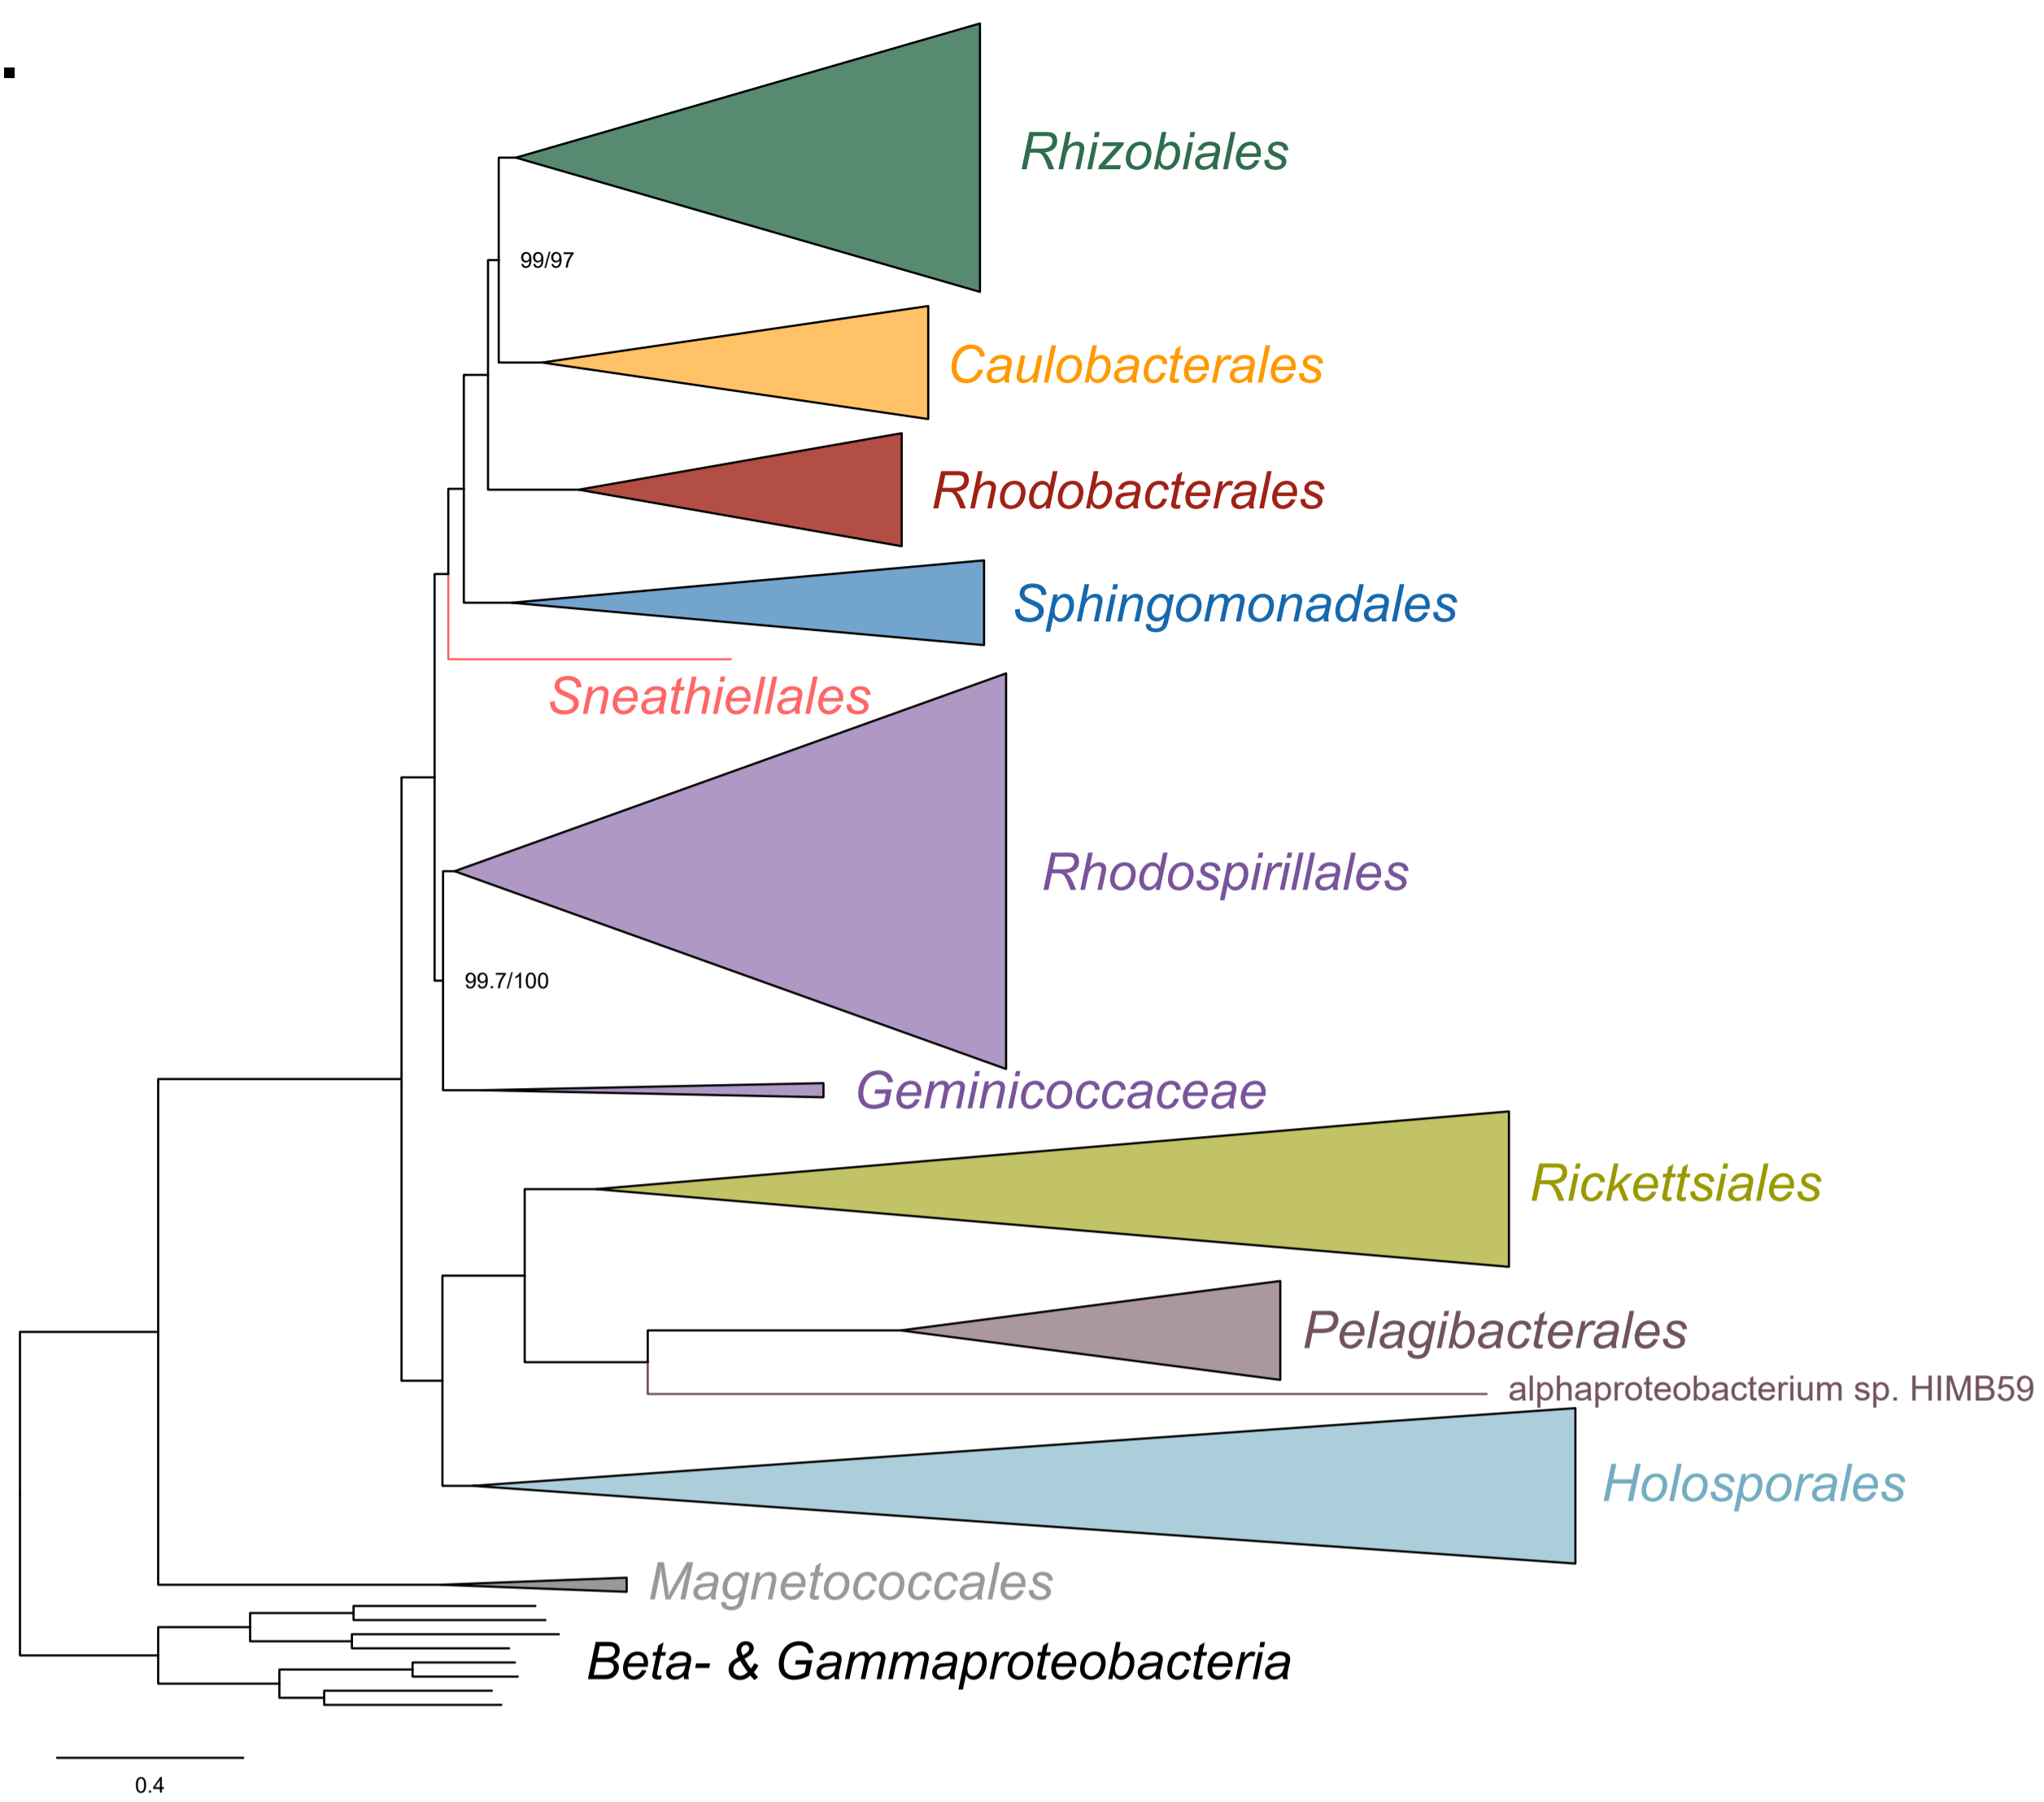

B.

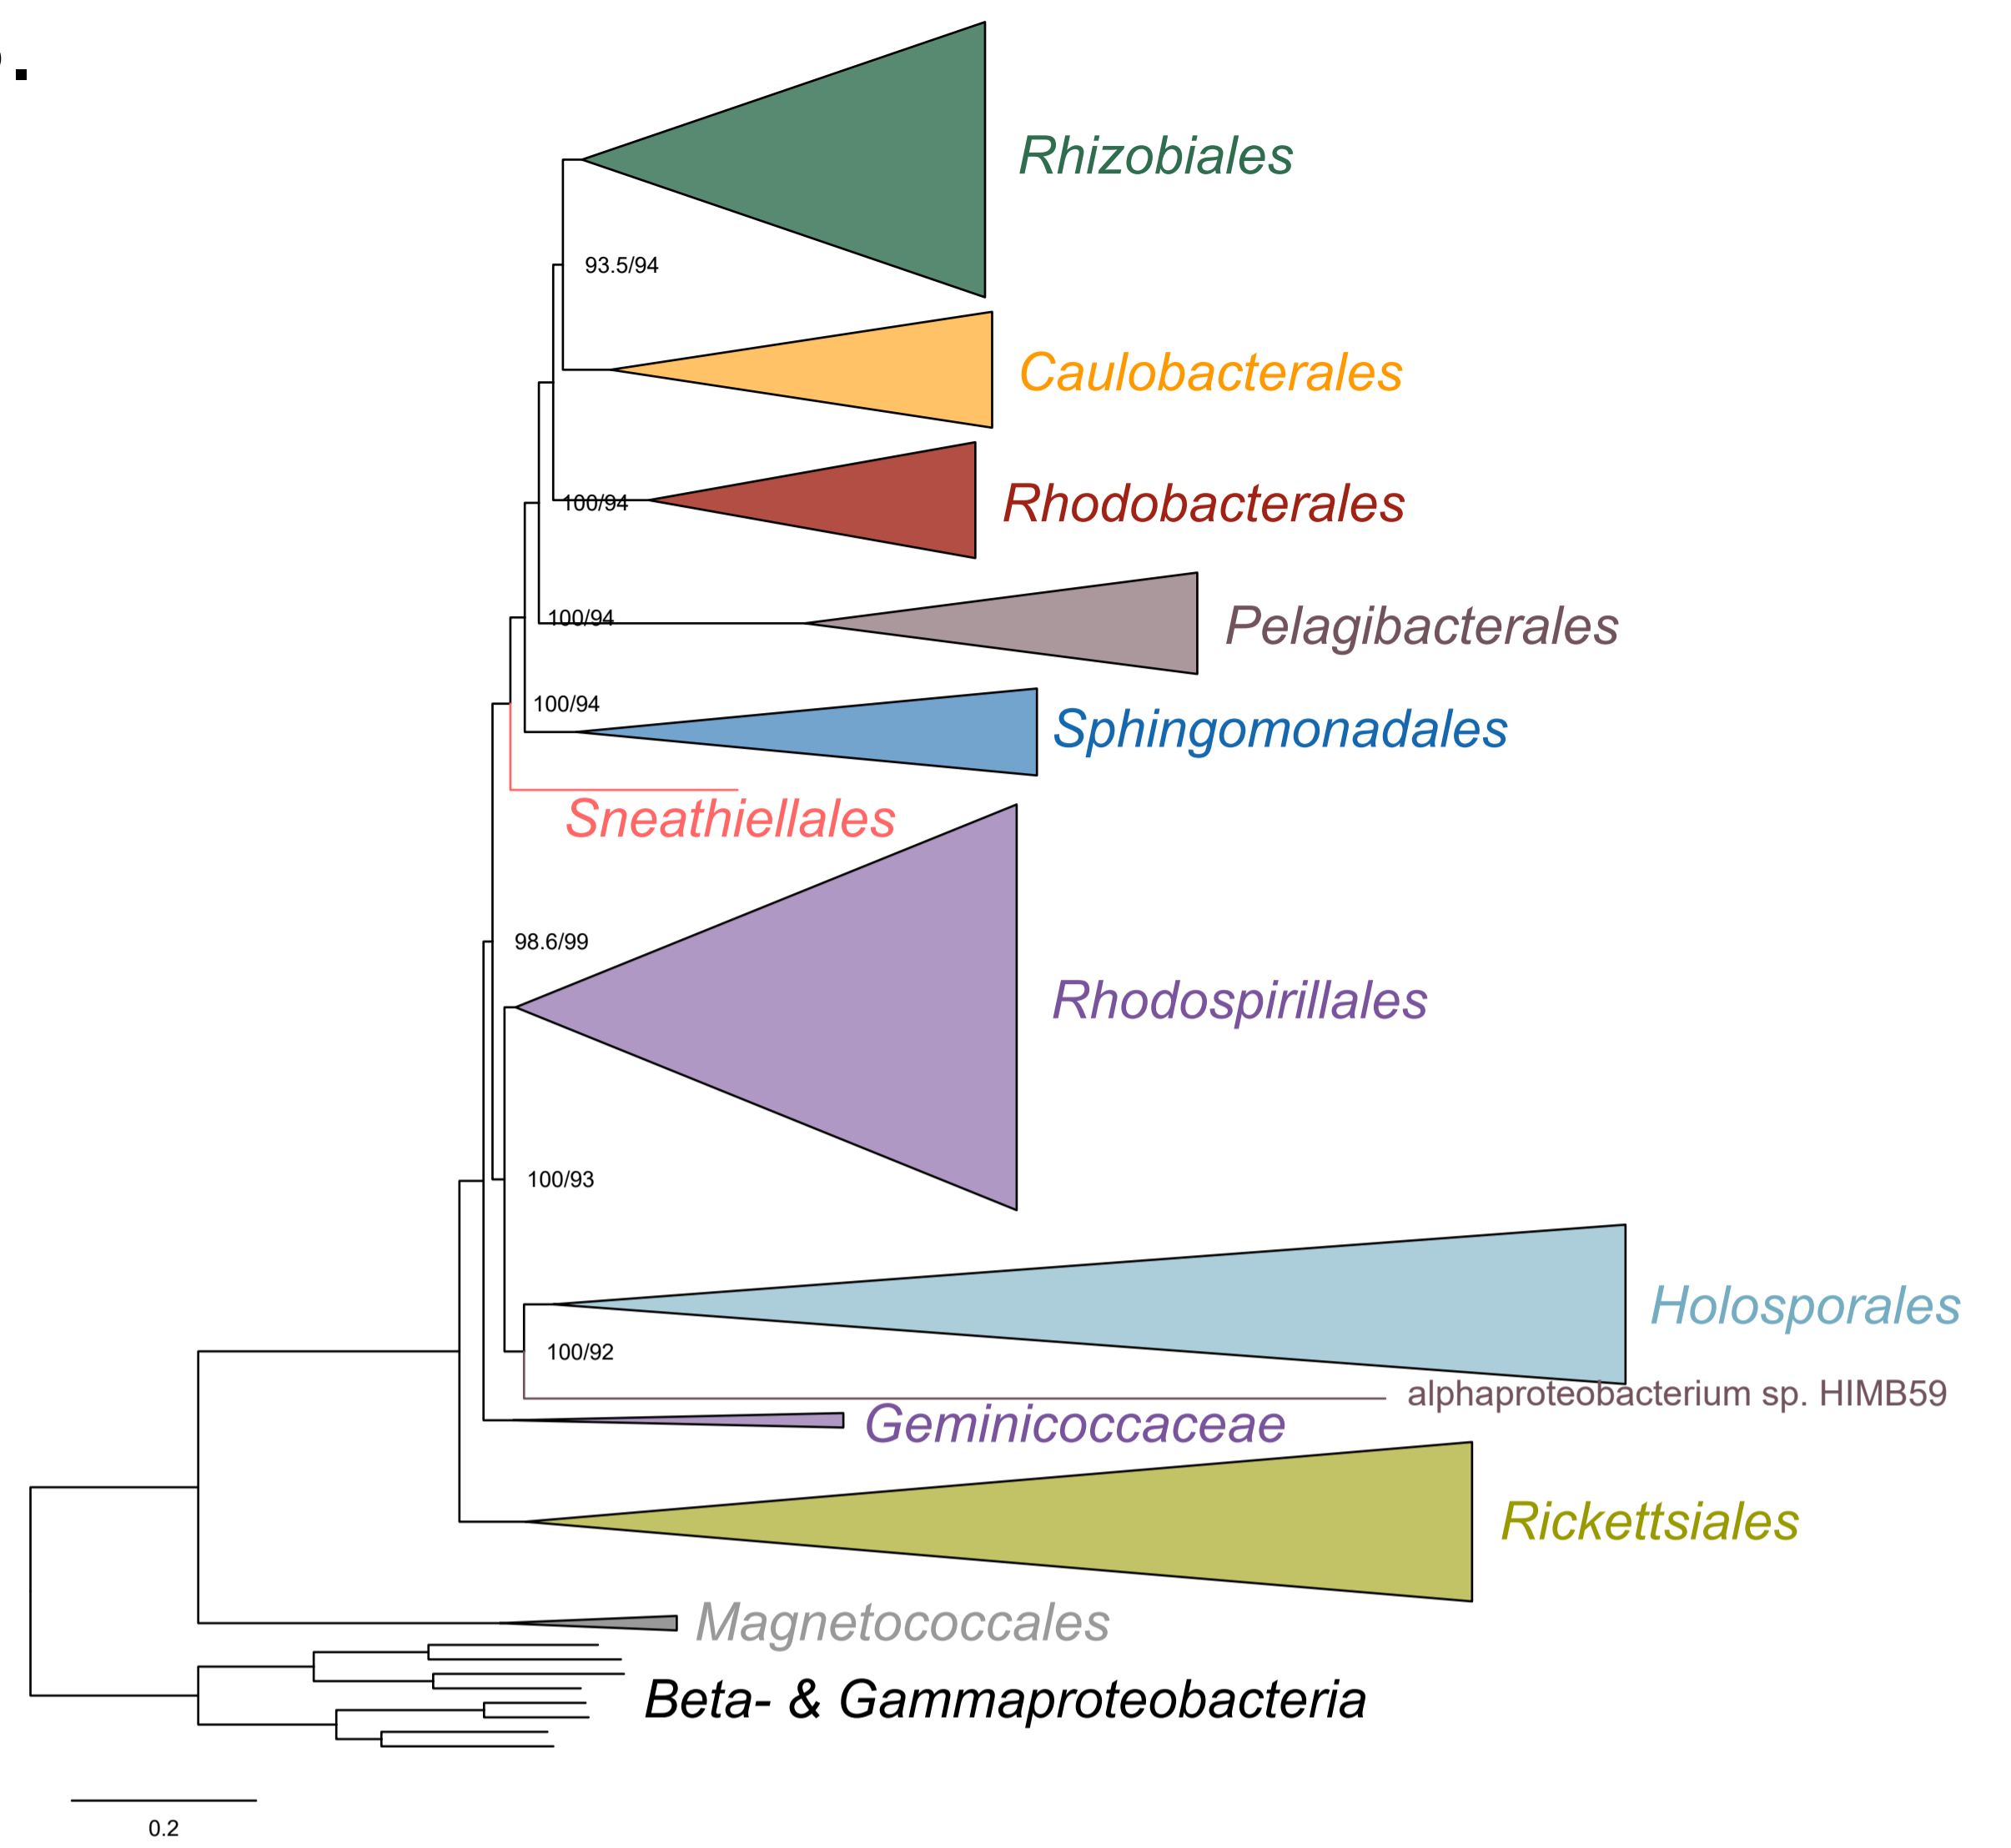

C.

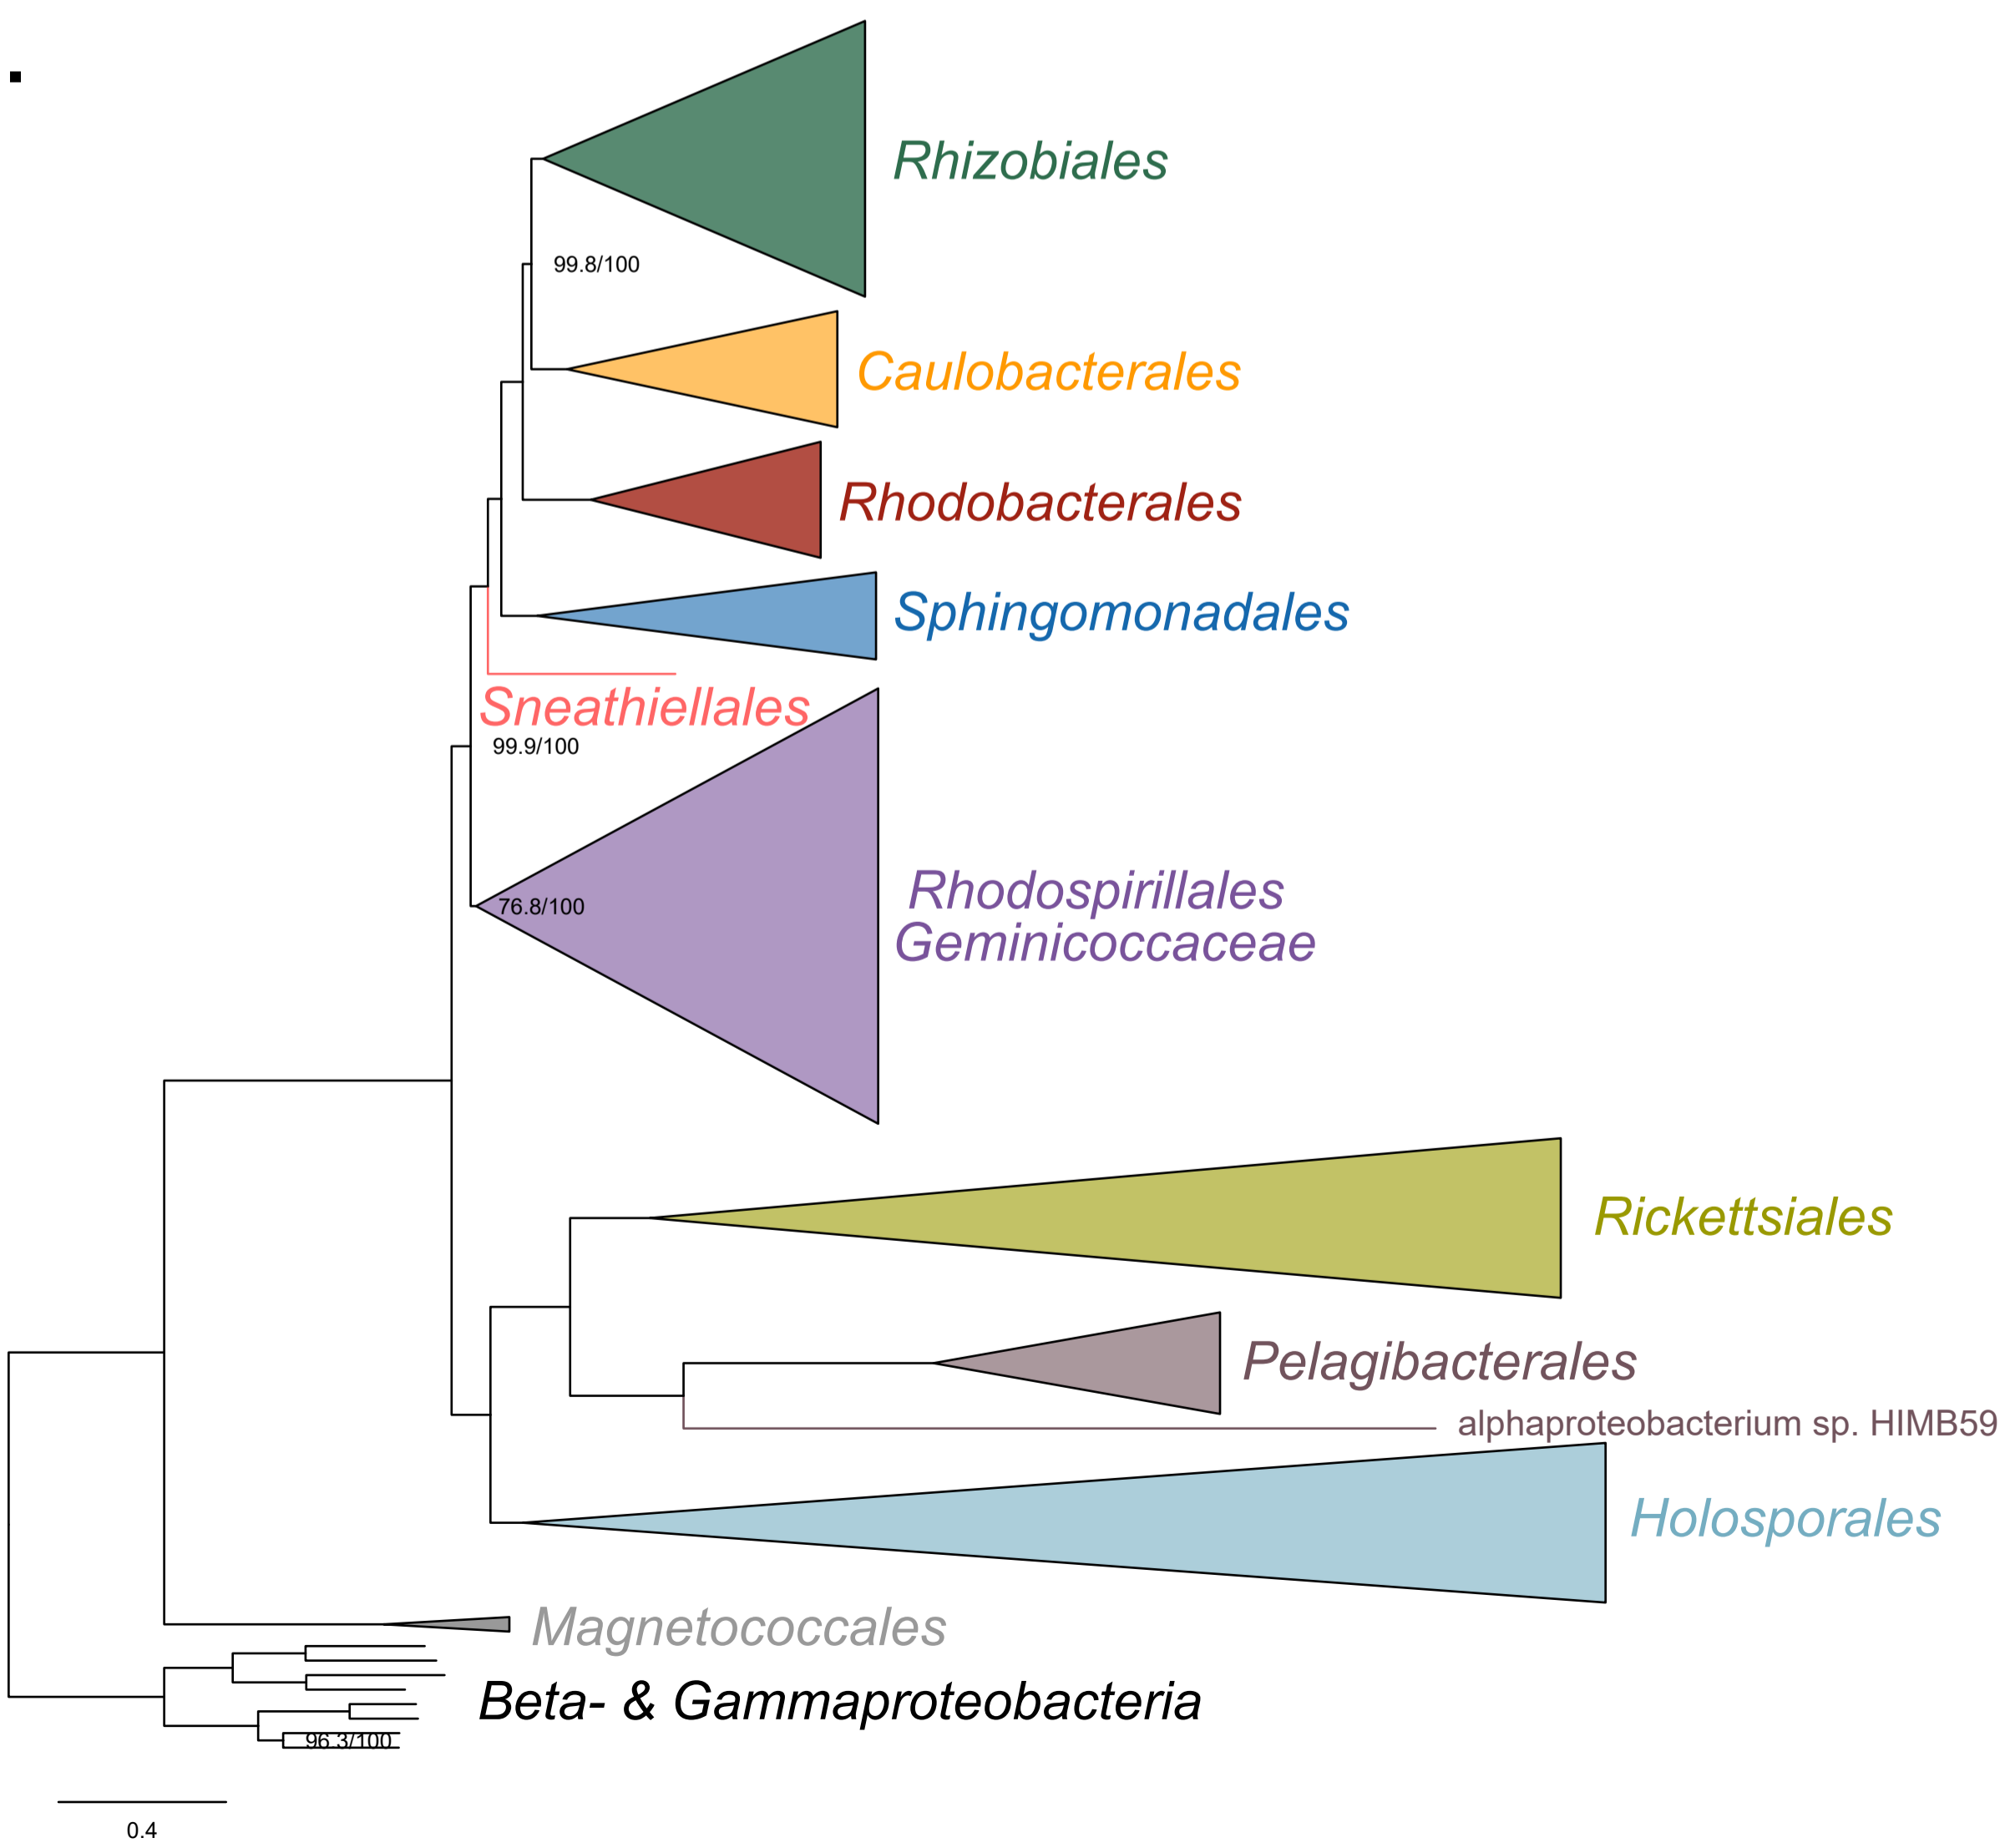

D.

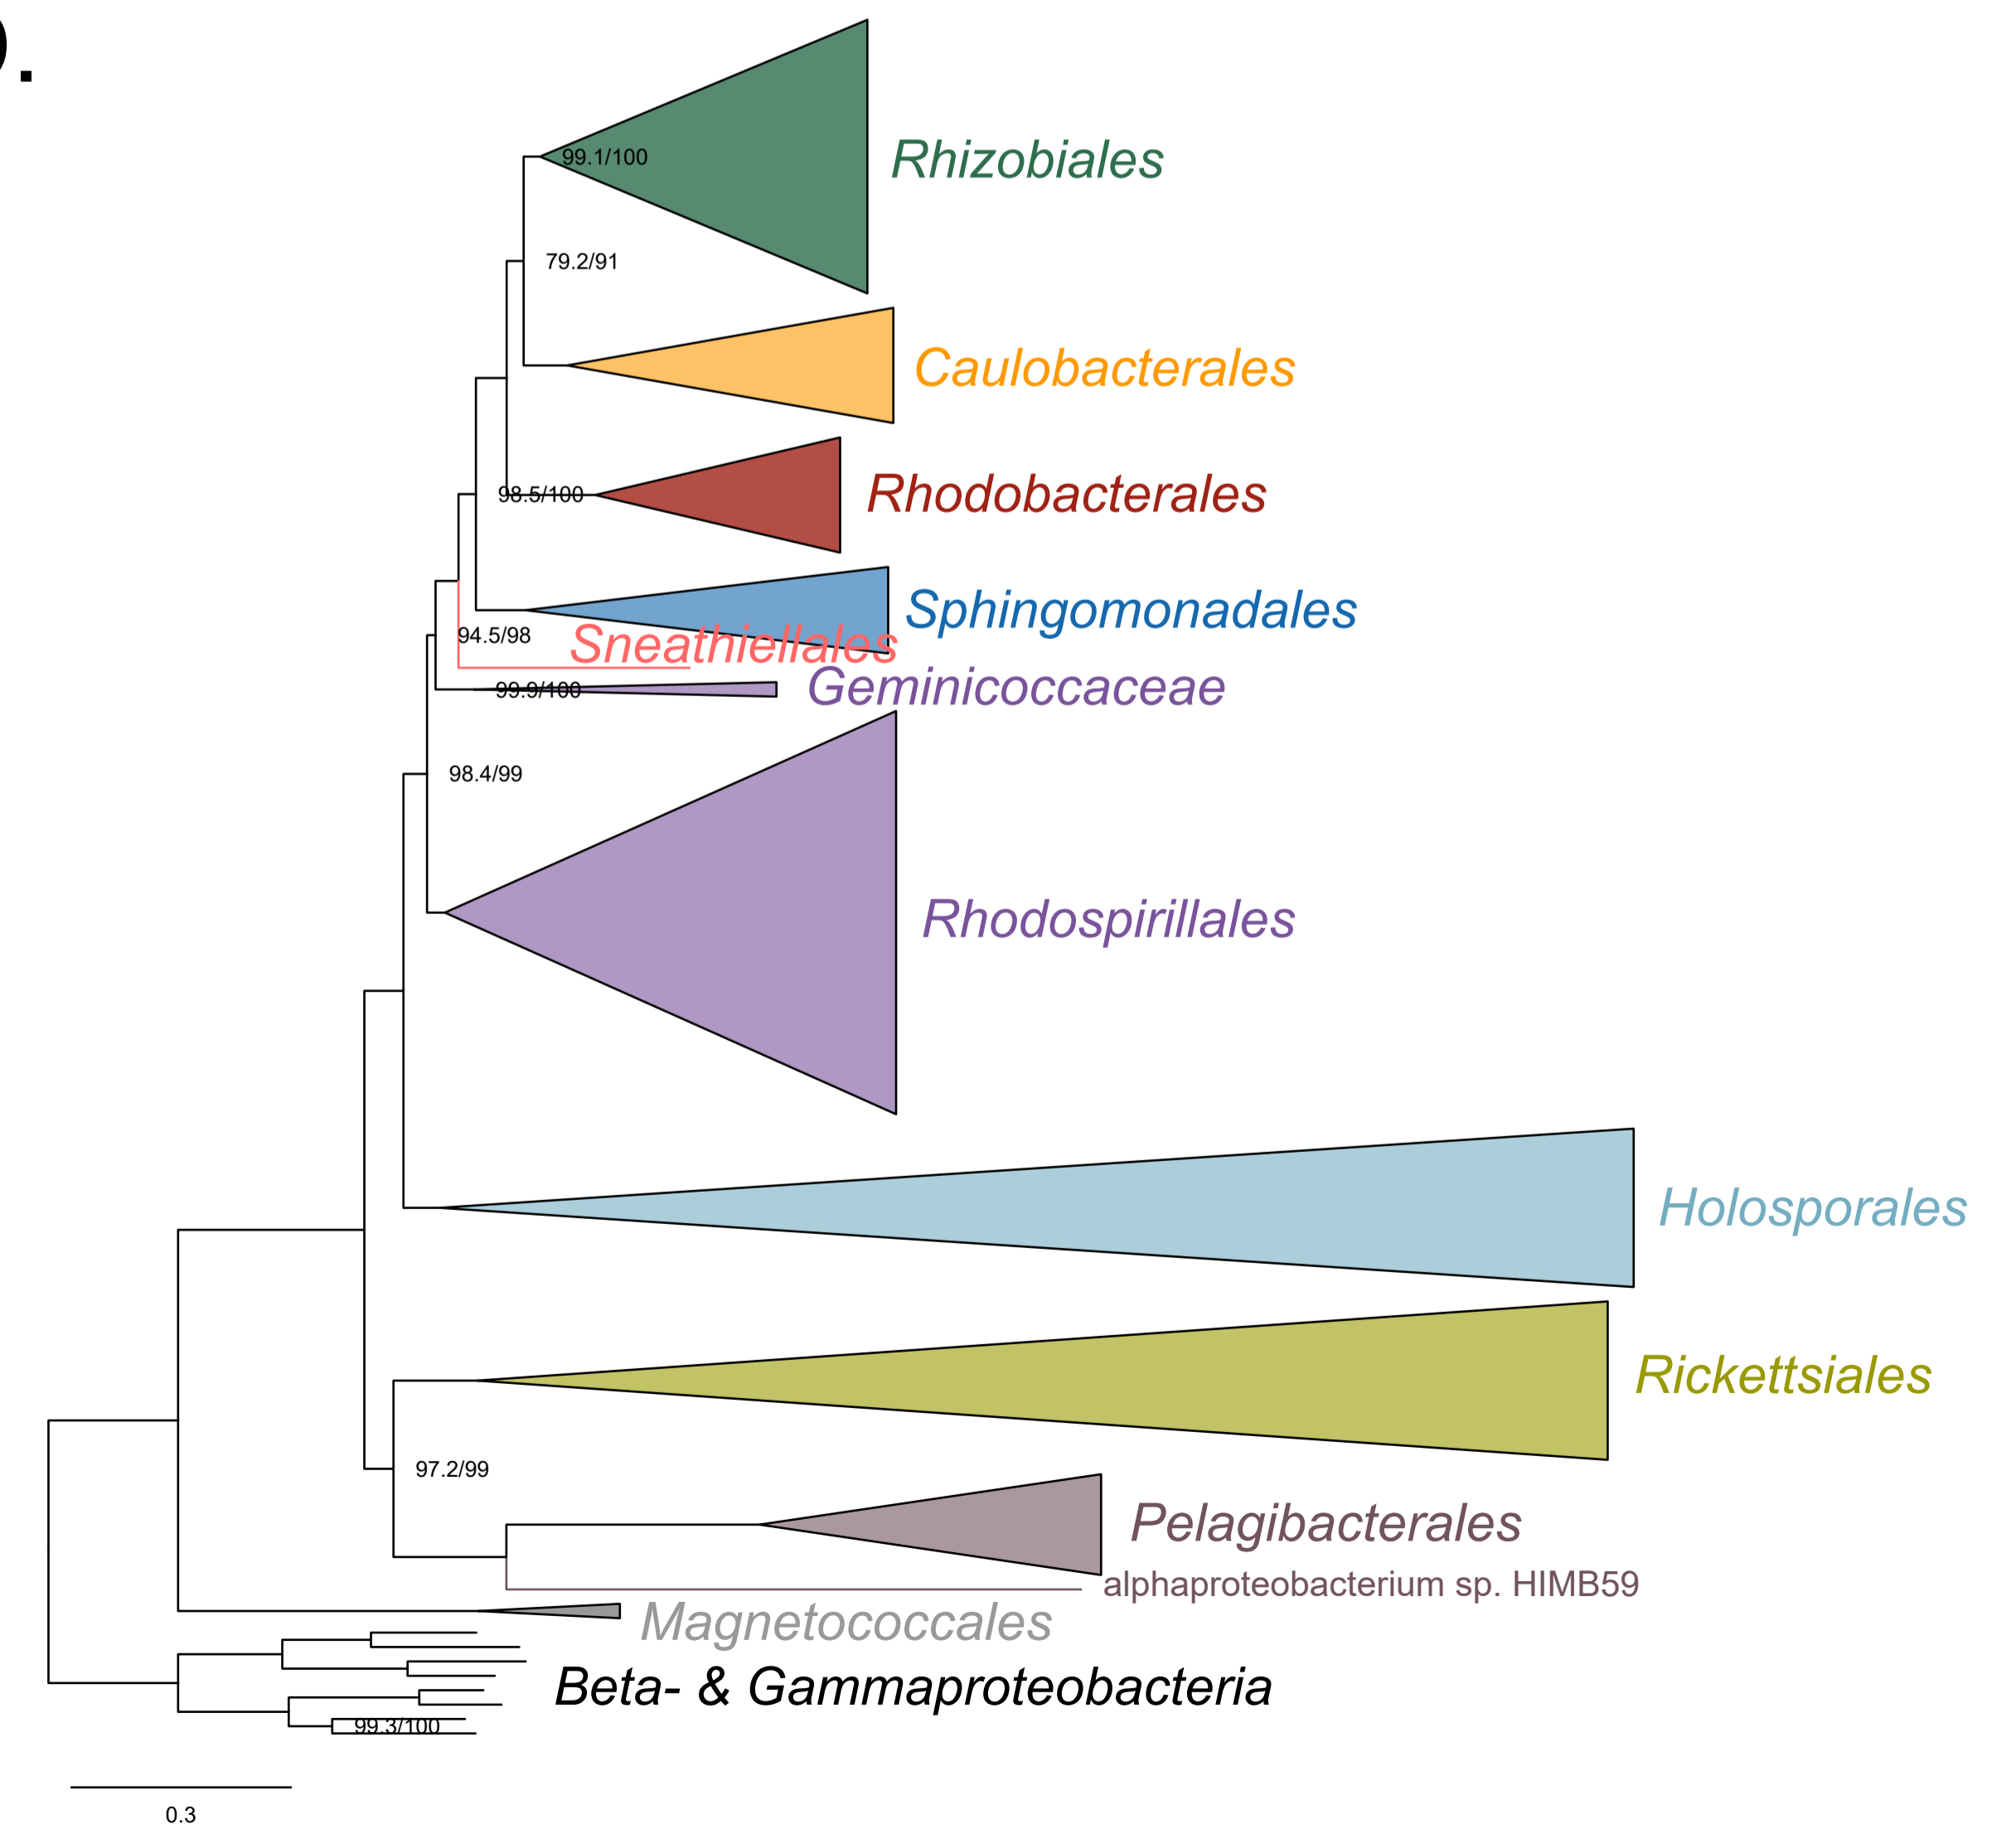

Supplement: supp [file elife-42535-supp-v2.zip › elife_poa_e42535_Figure_2_figure_supplement_4.pdf]

A.

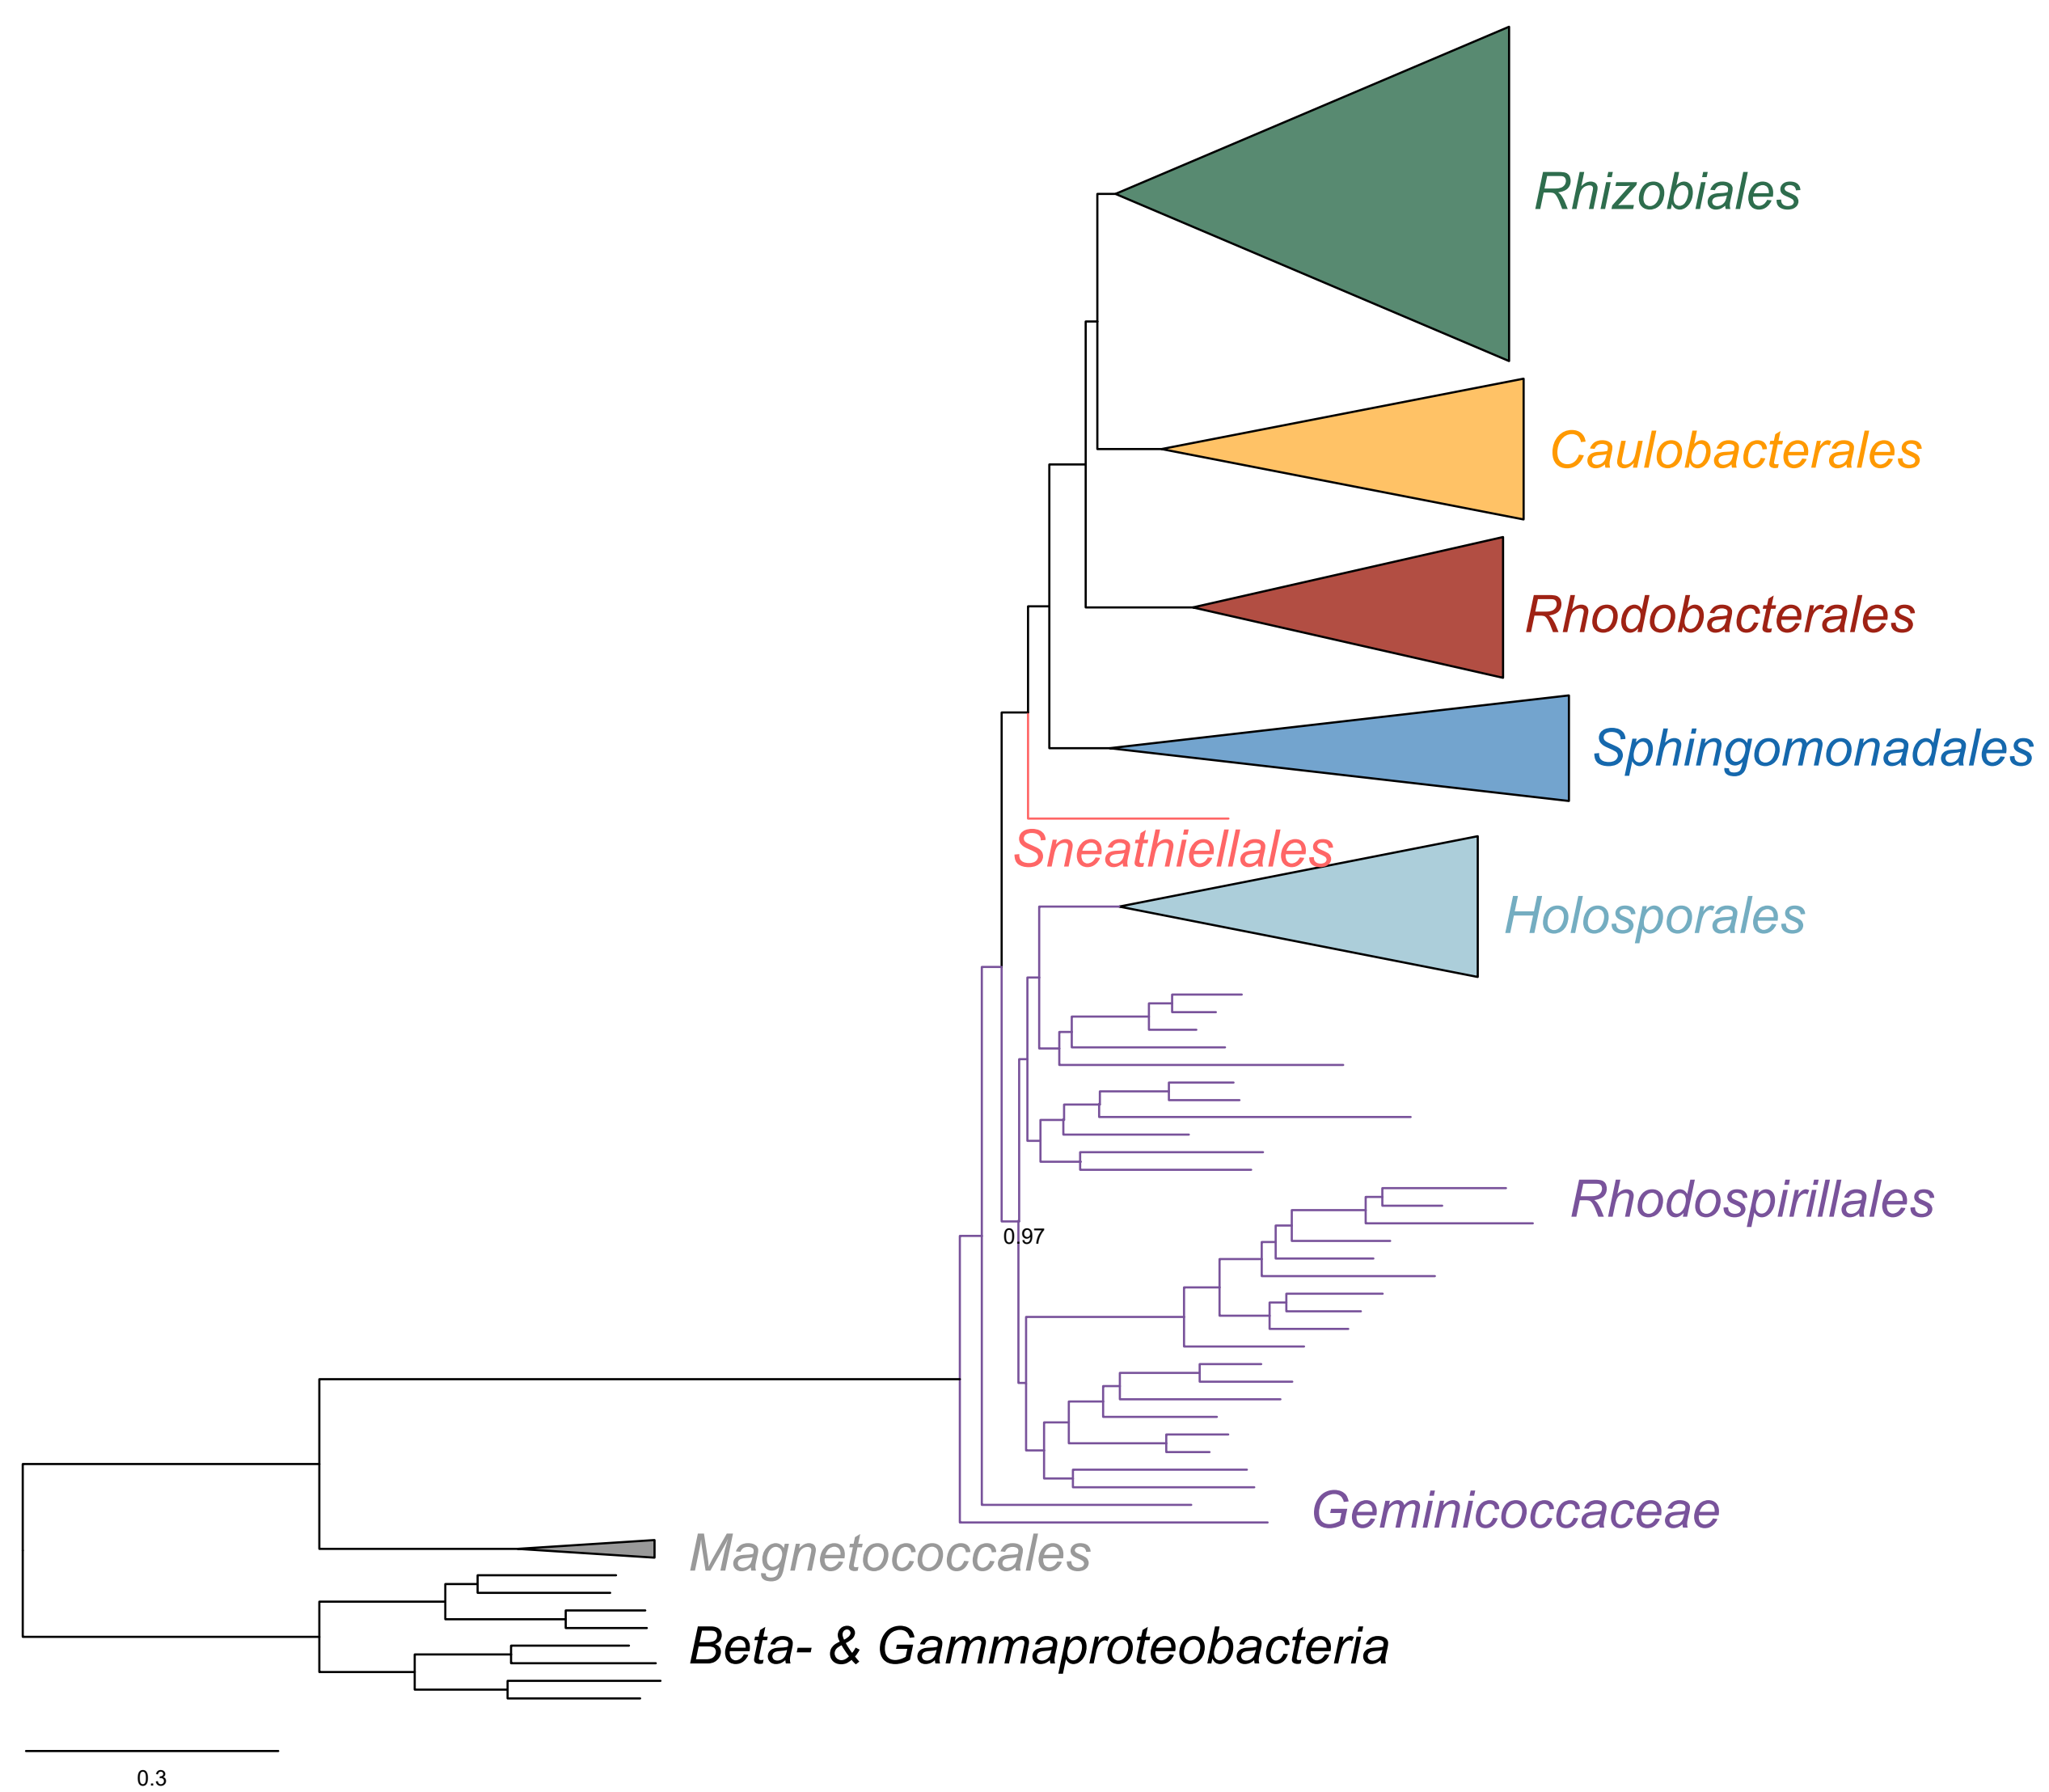

B.

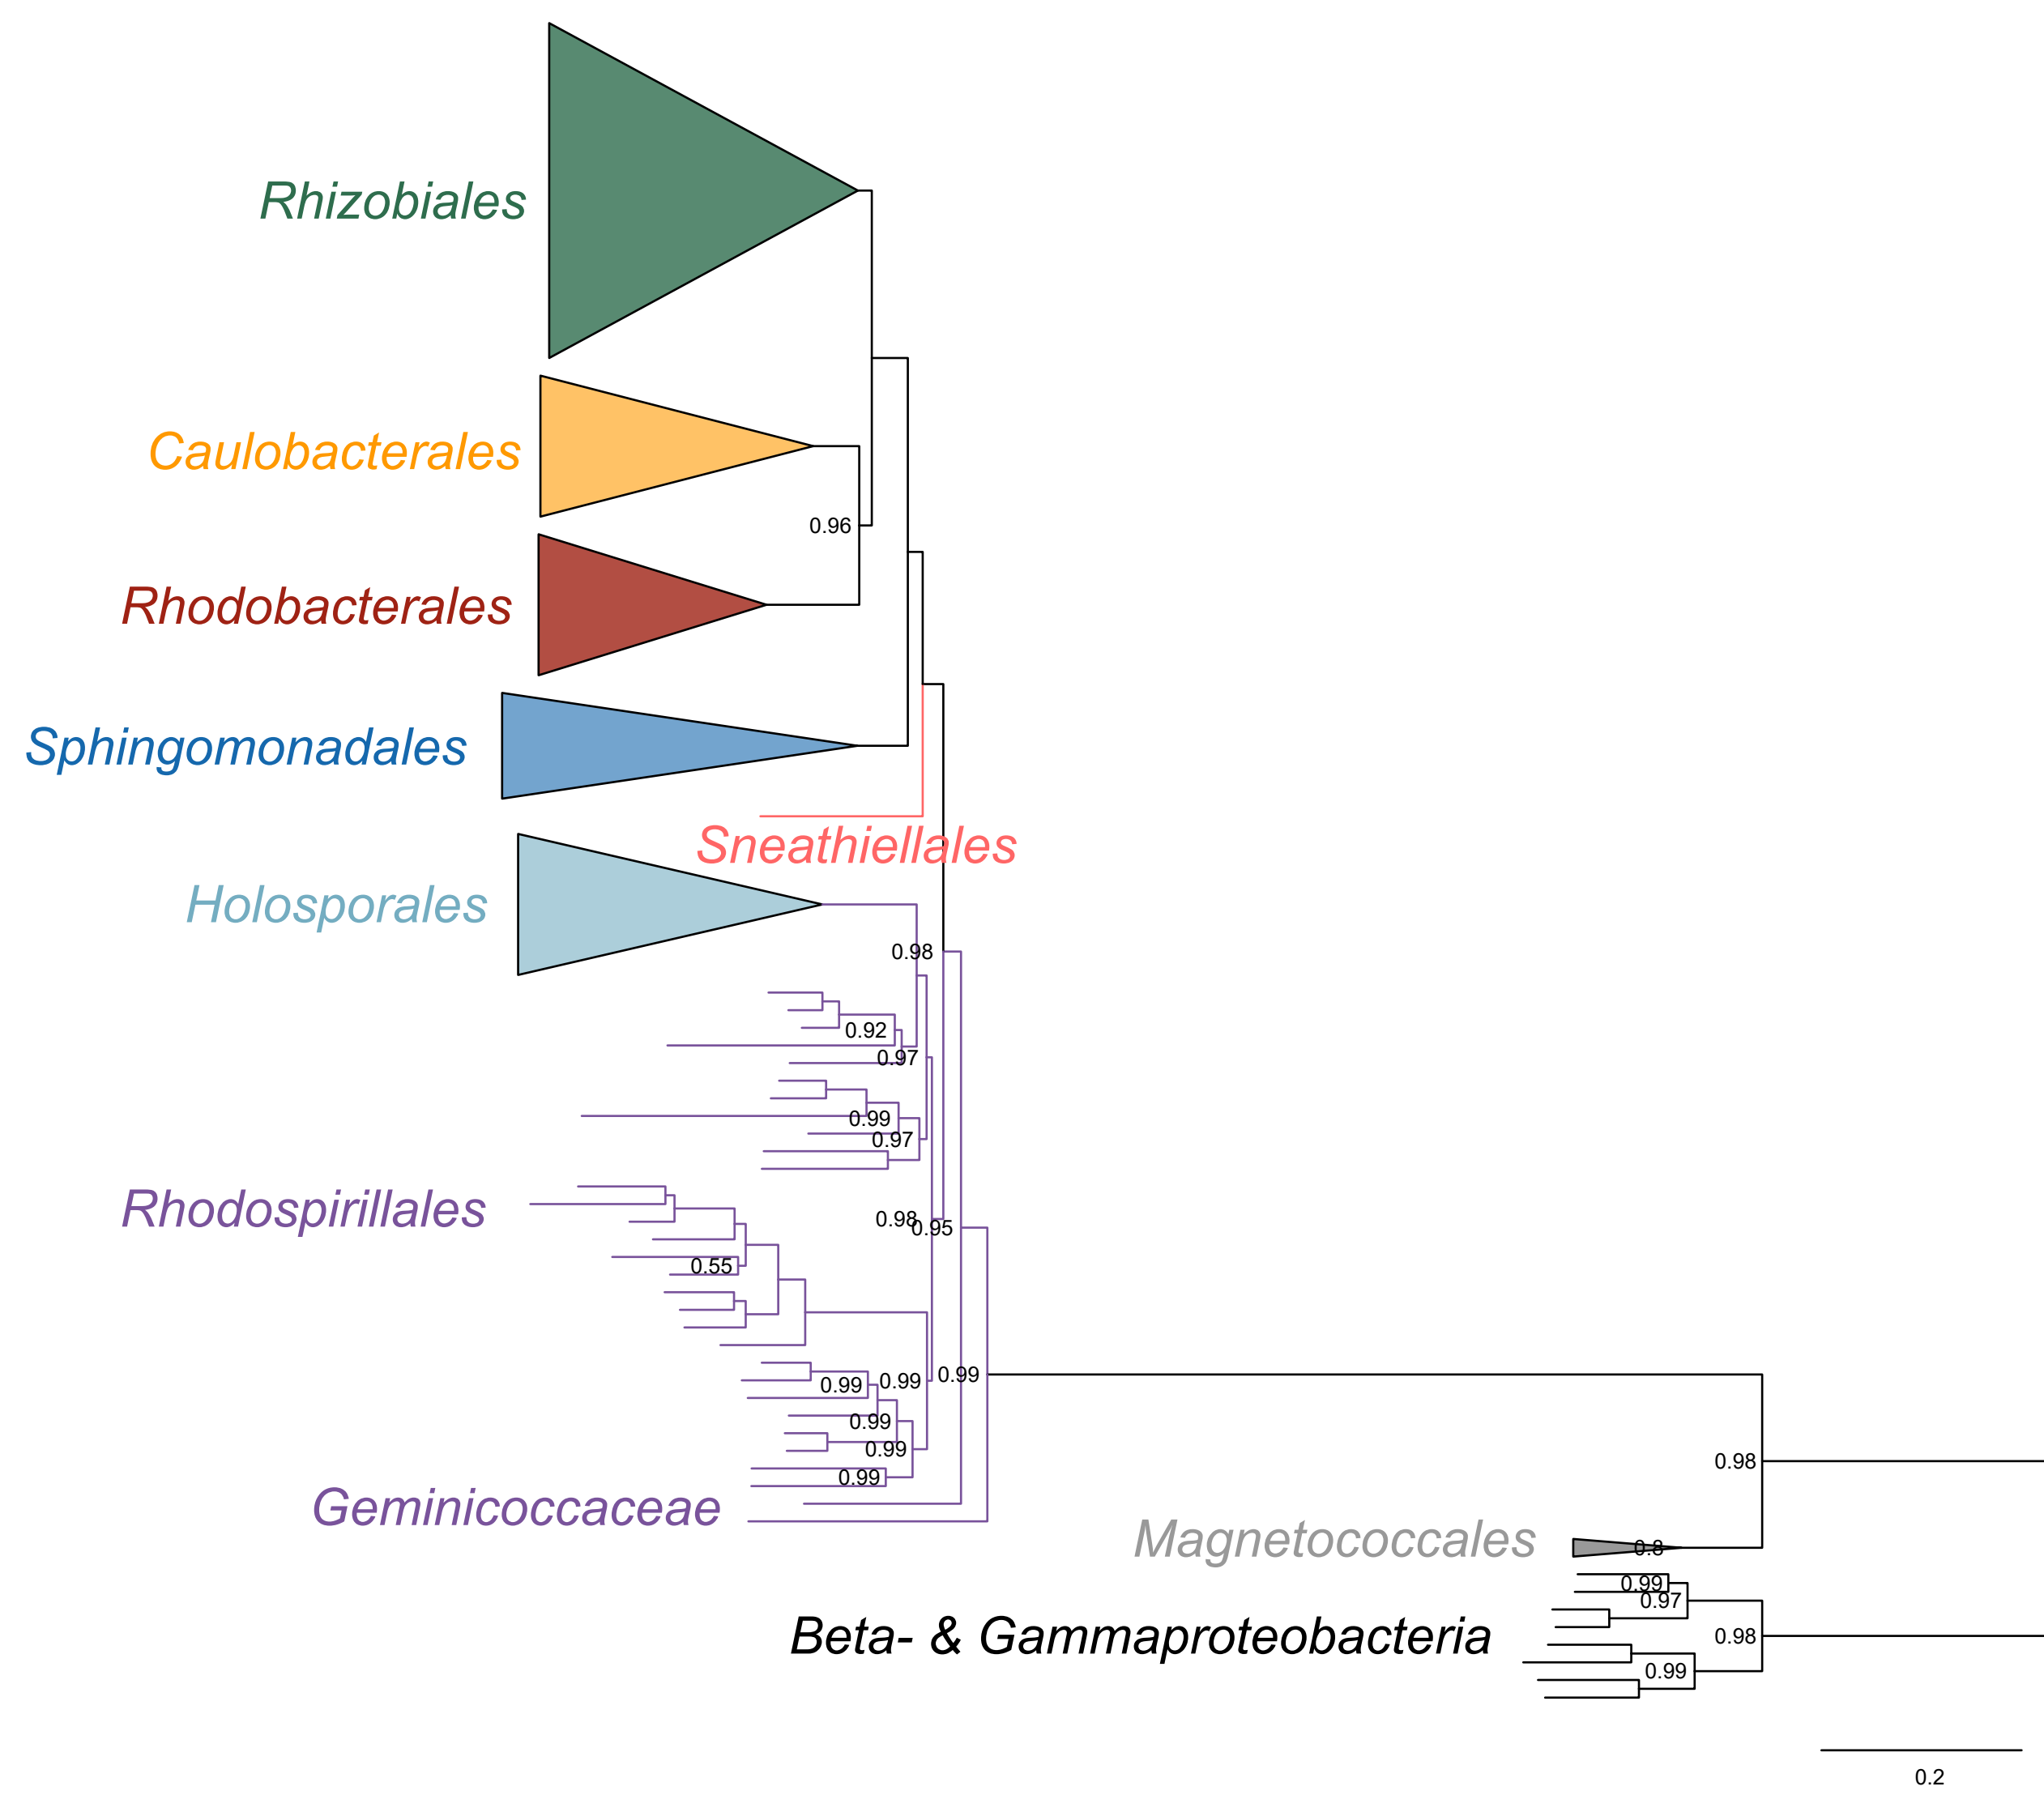

Supplement: supp [file elife-42535-supp-v2.zip › elife_poa_e42535_Figure_3_figure_supplement_6.pdf]

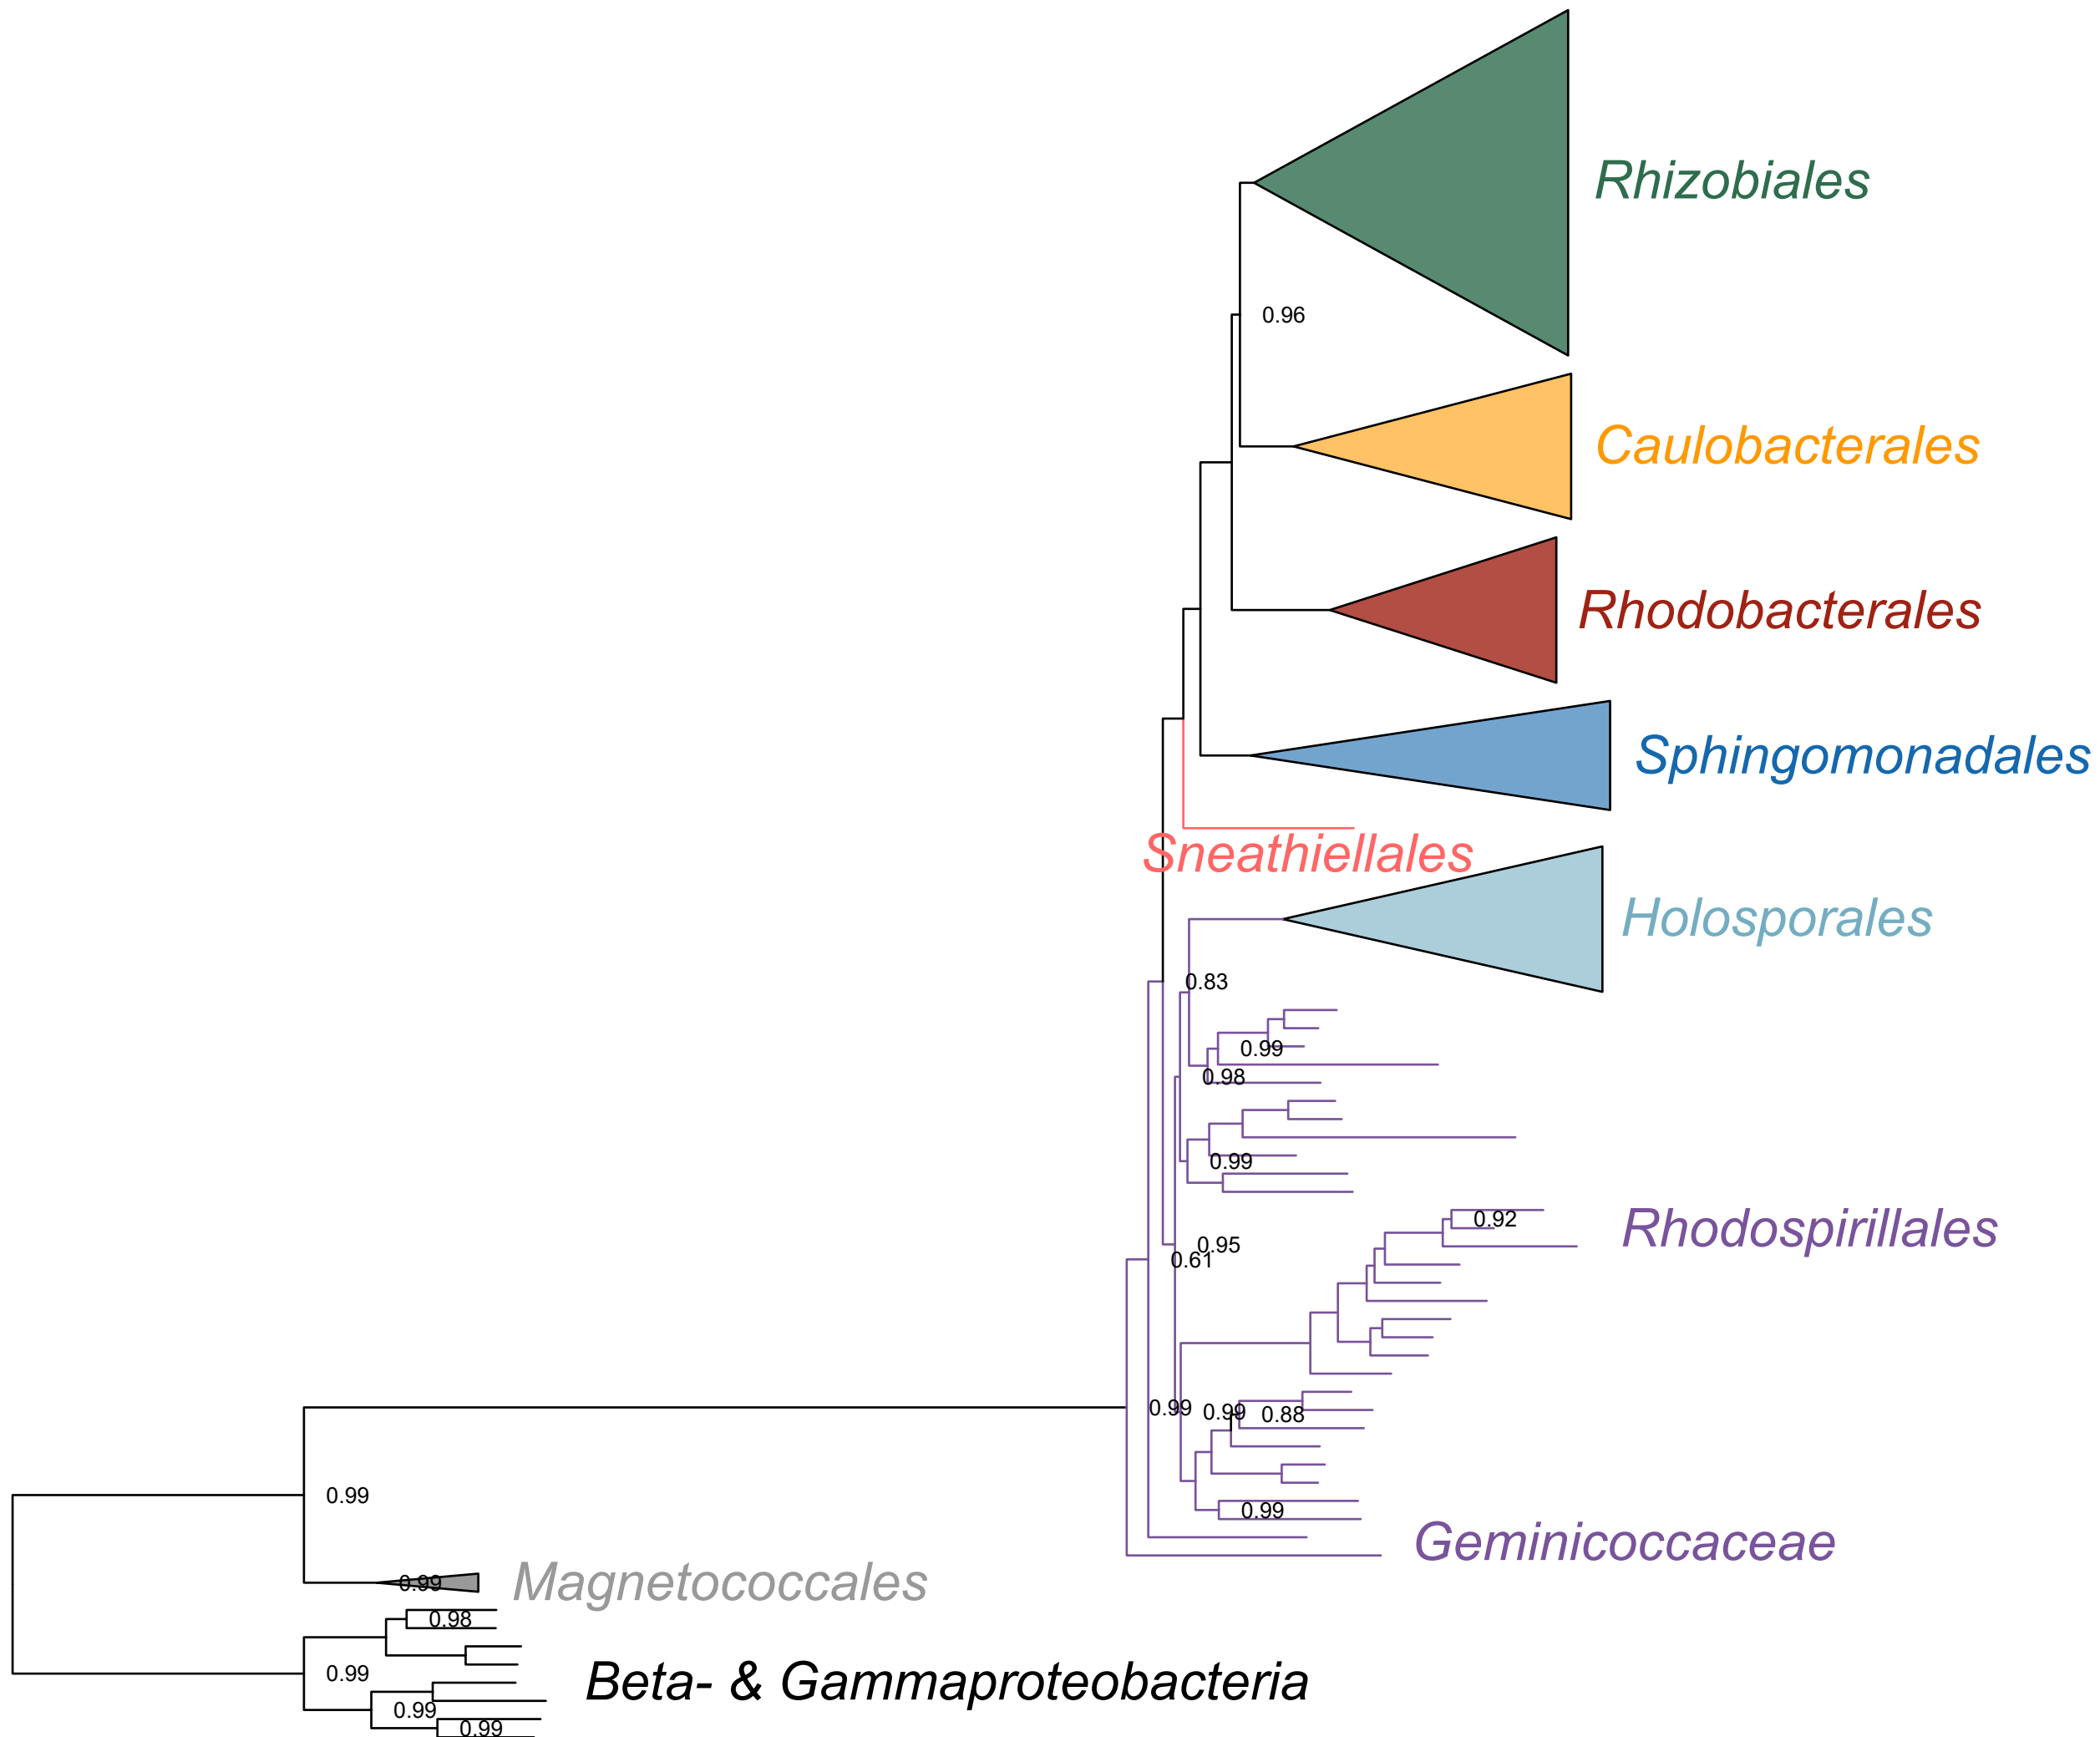

0.4

Supplement: supp [file elife-42535-supp-v2.zip › elife_poa_e42535_Figure_3_figure_supplement_8.pdf]

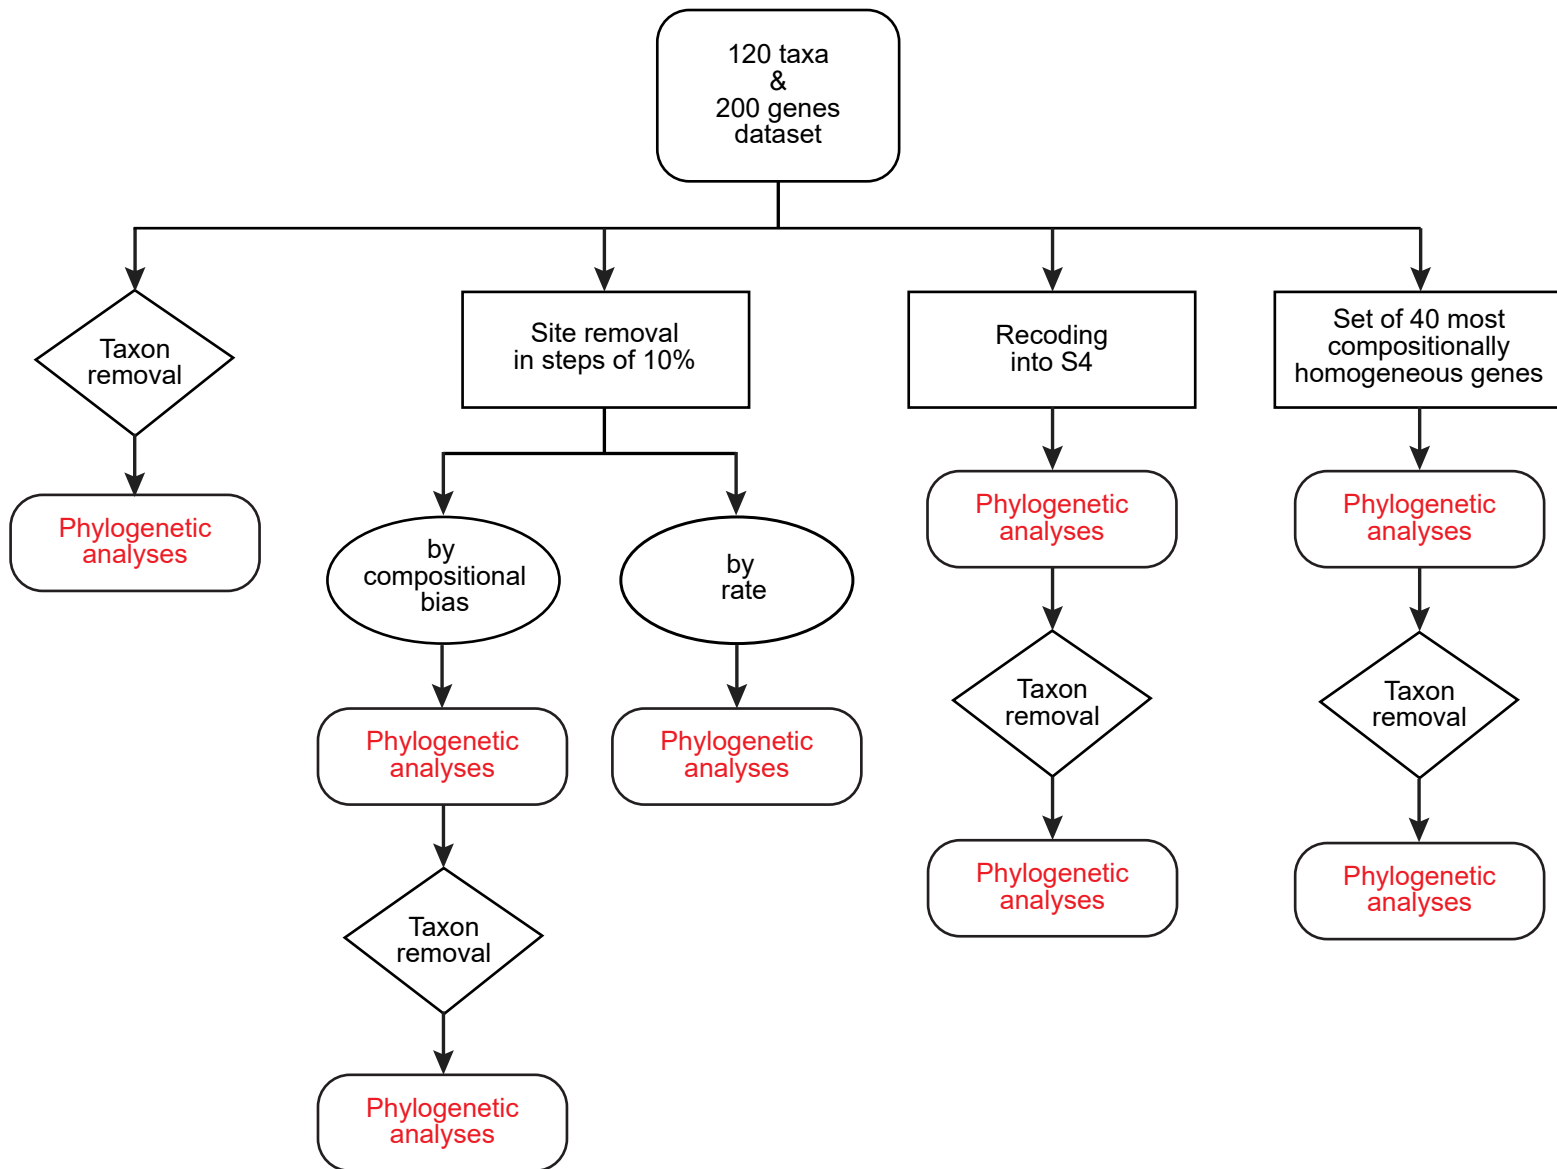

Supplement: supp [file elife-42535-supp-v2.zip › elife_poa_e42535_Figure_2_figure_supplement_2.pdf]

GARP:FIMNKY ratio

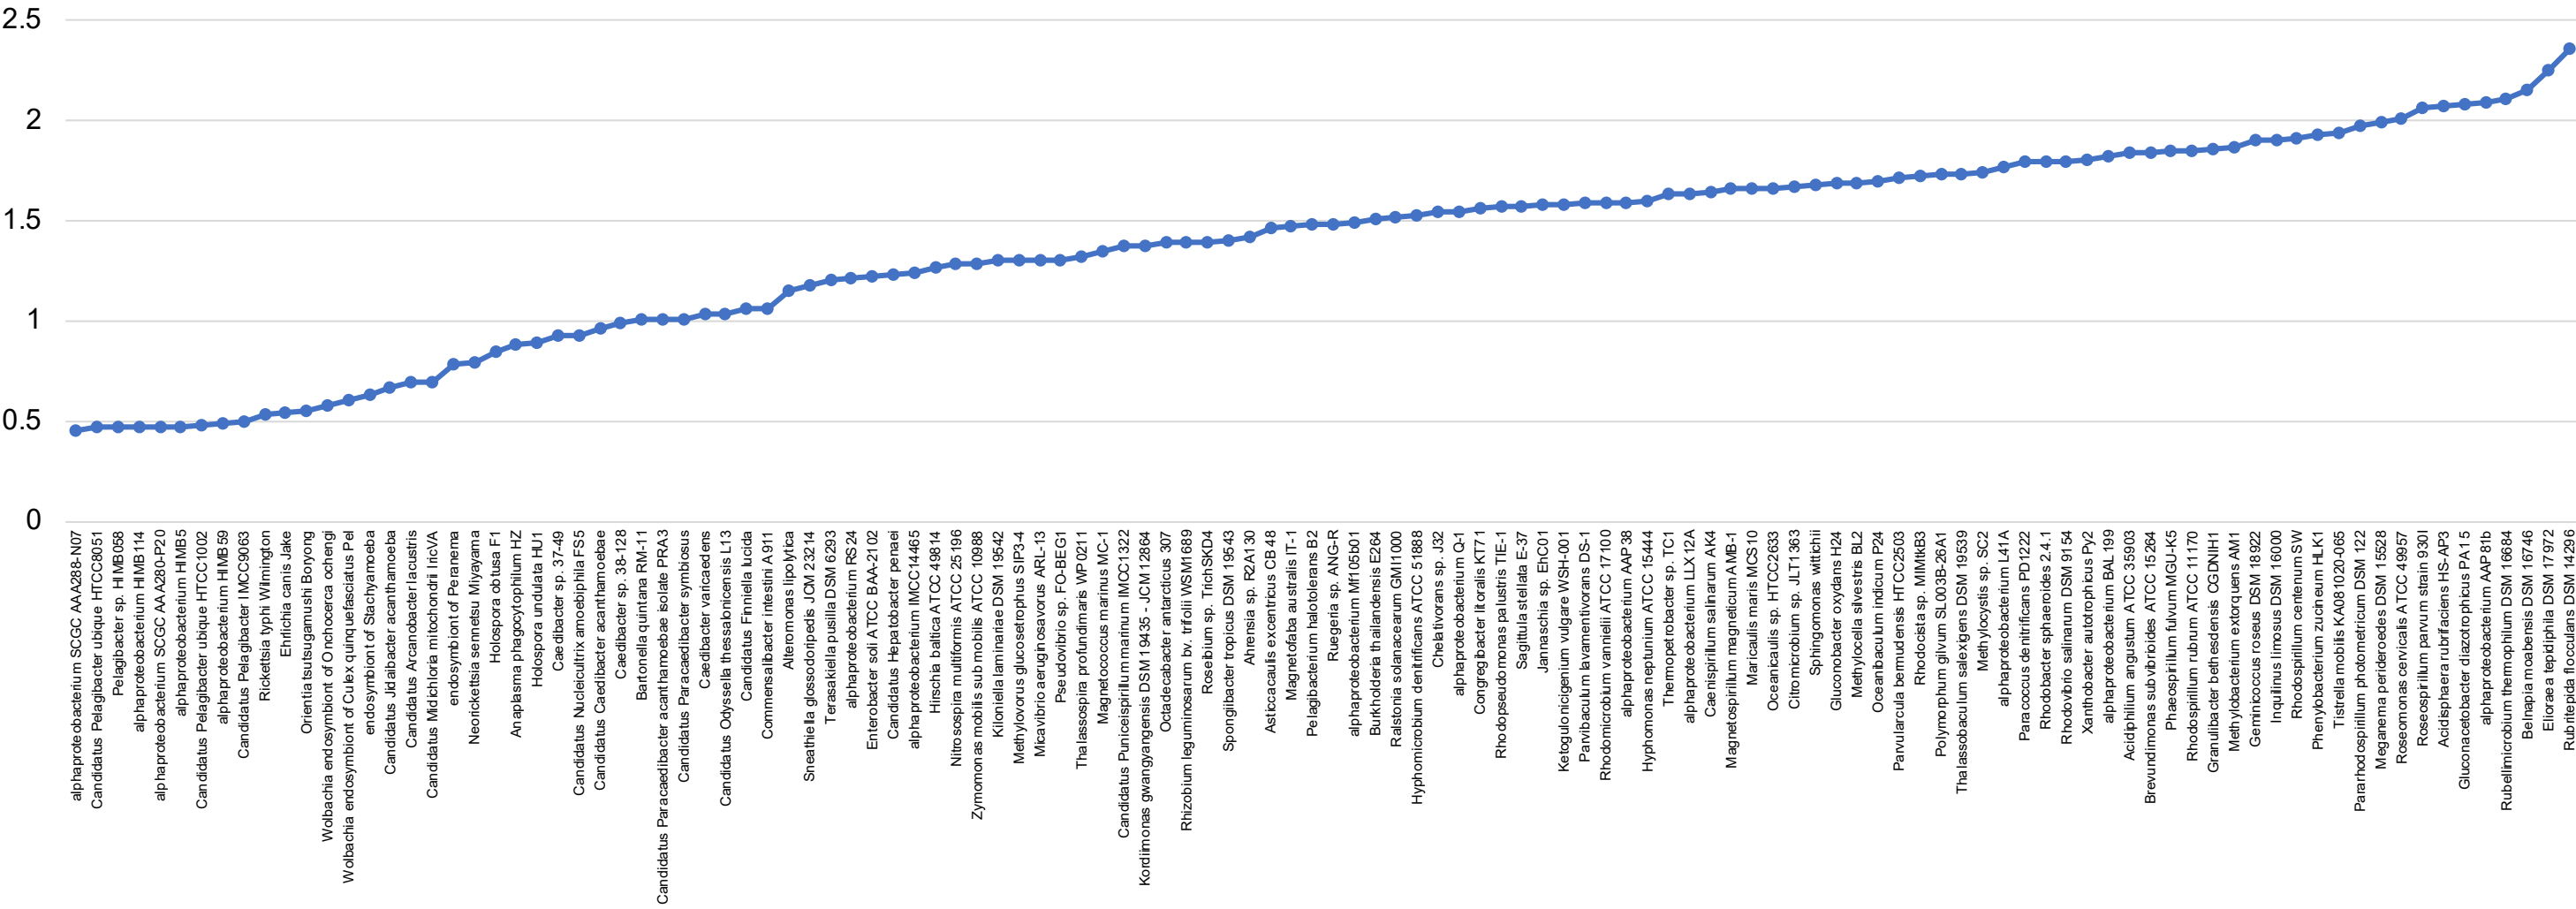

Taxon

Supplement: supp [file elife-42535-supp-v2.zip › elife_poa_e42535_Figure_2_figure_supplement_7.pdf]

A.

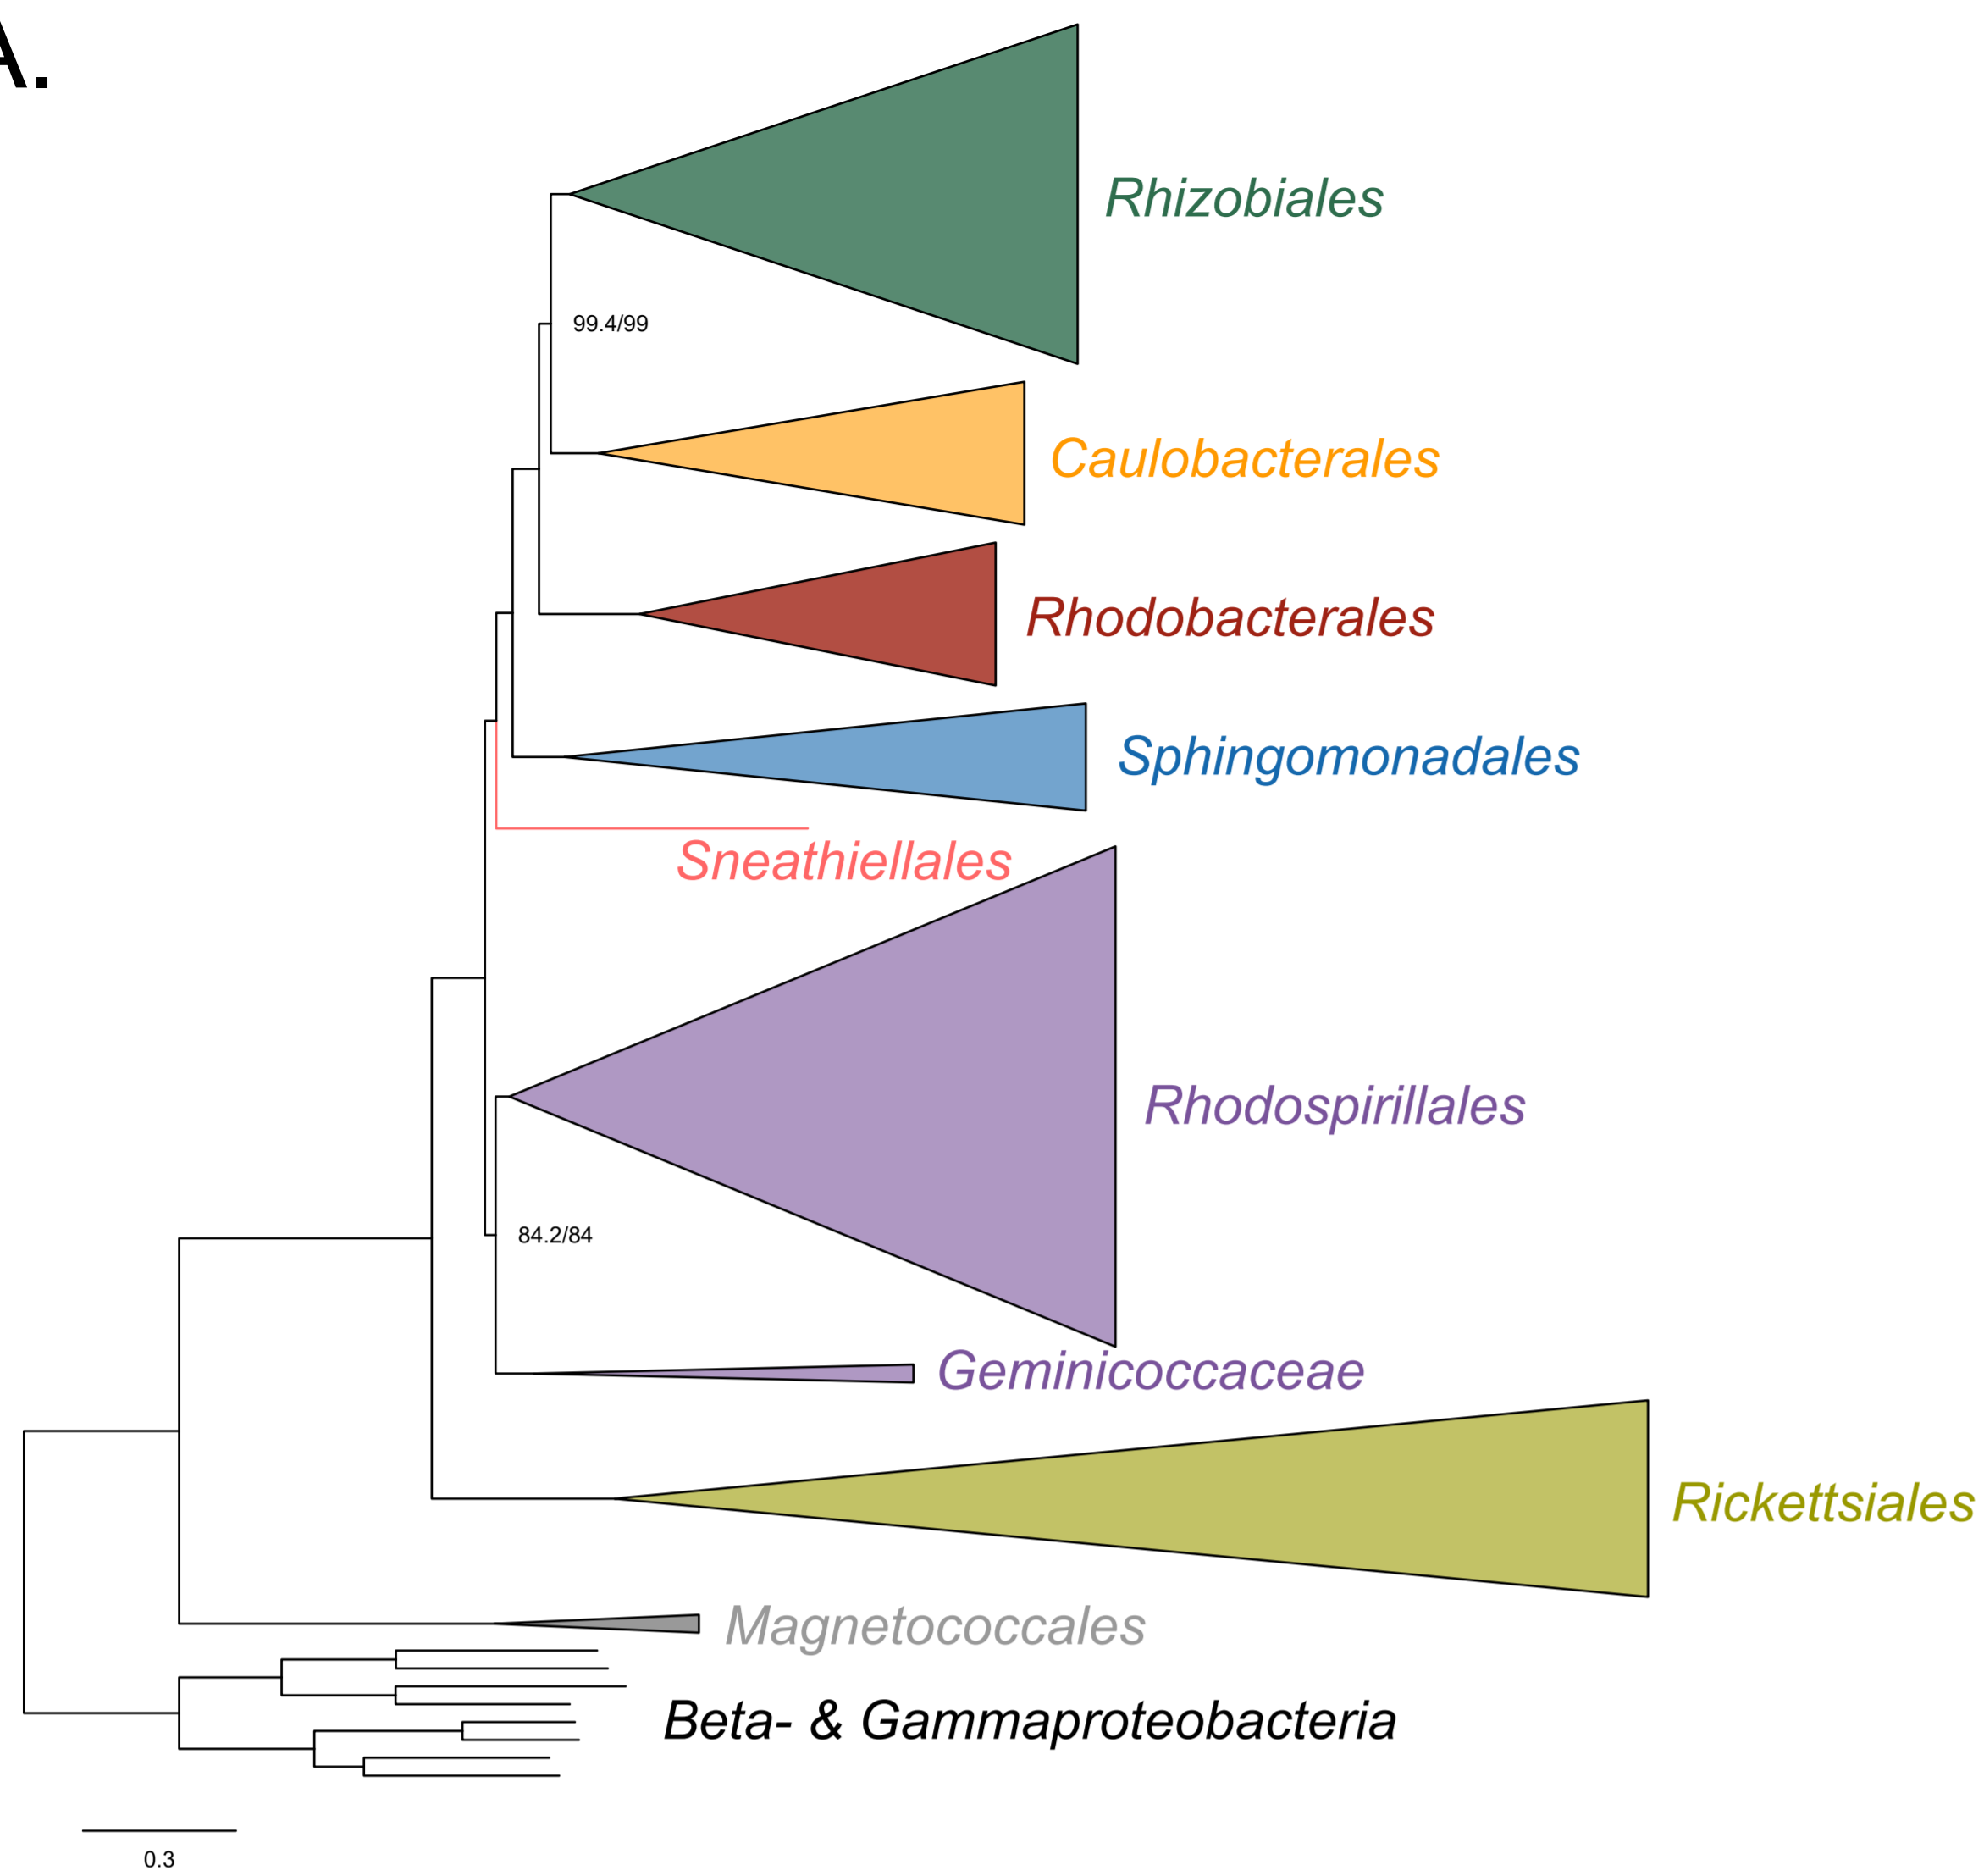

B.

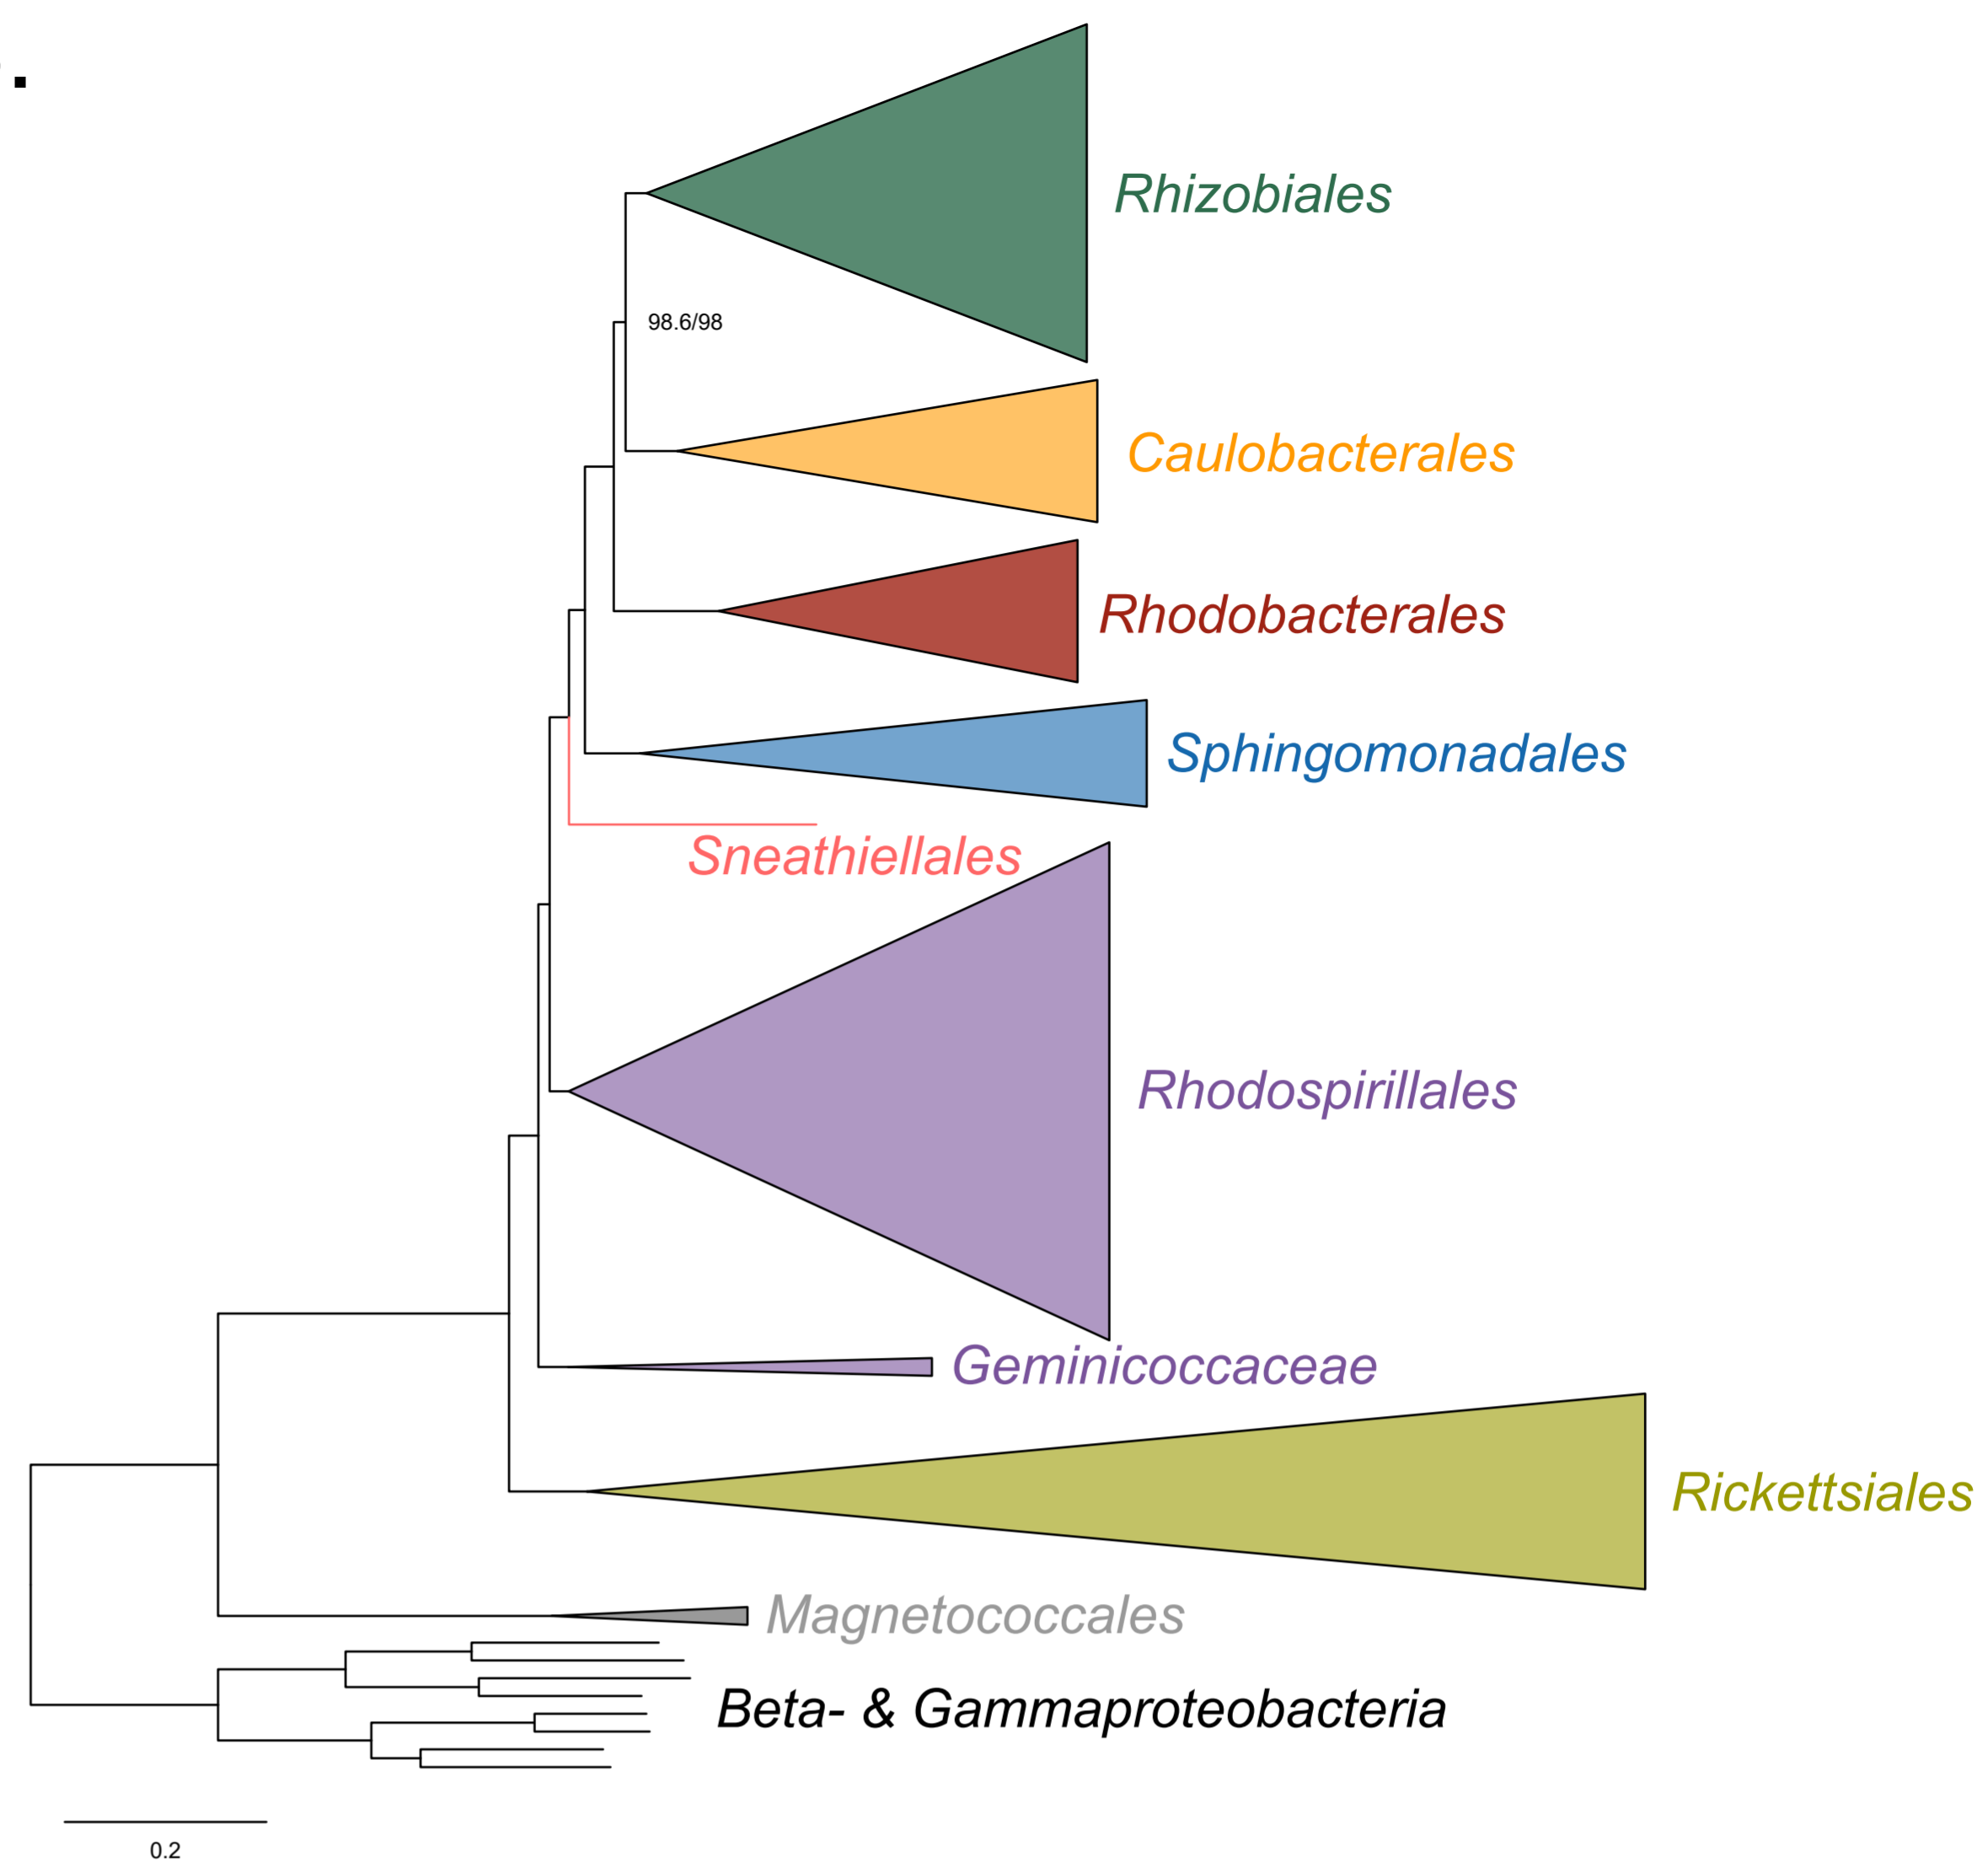

C.

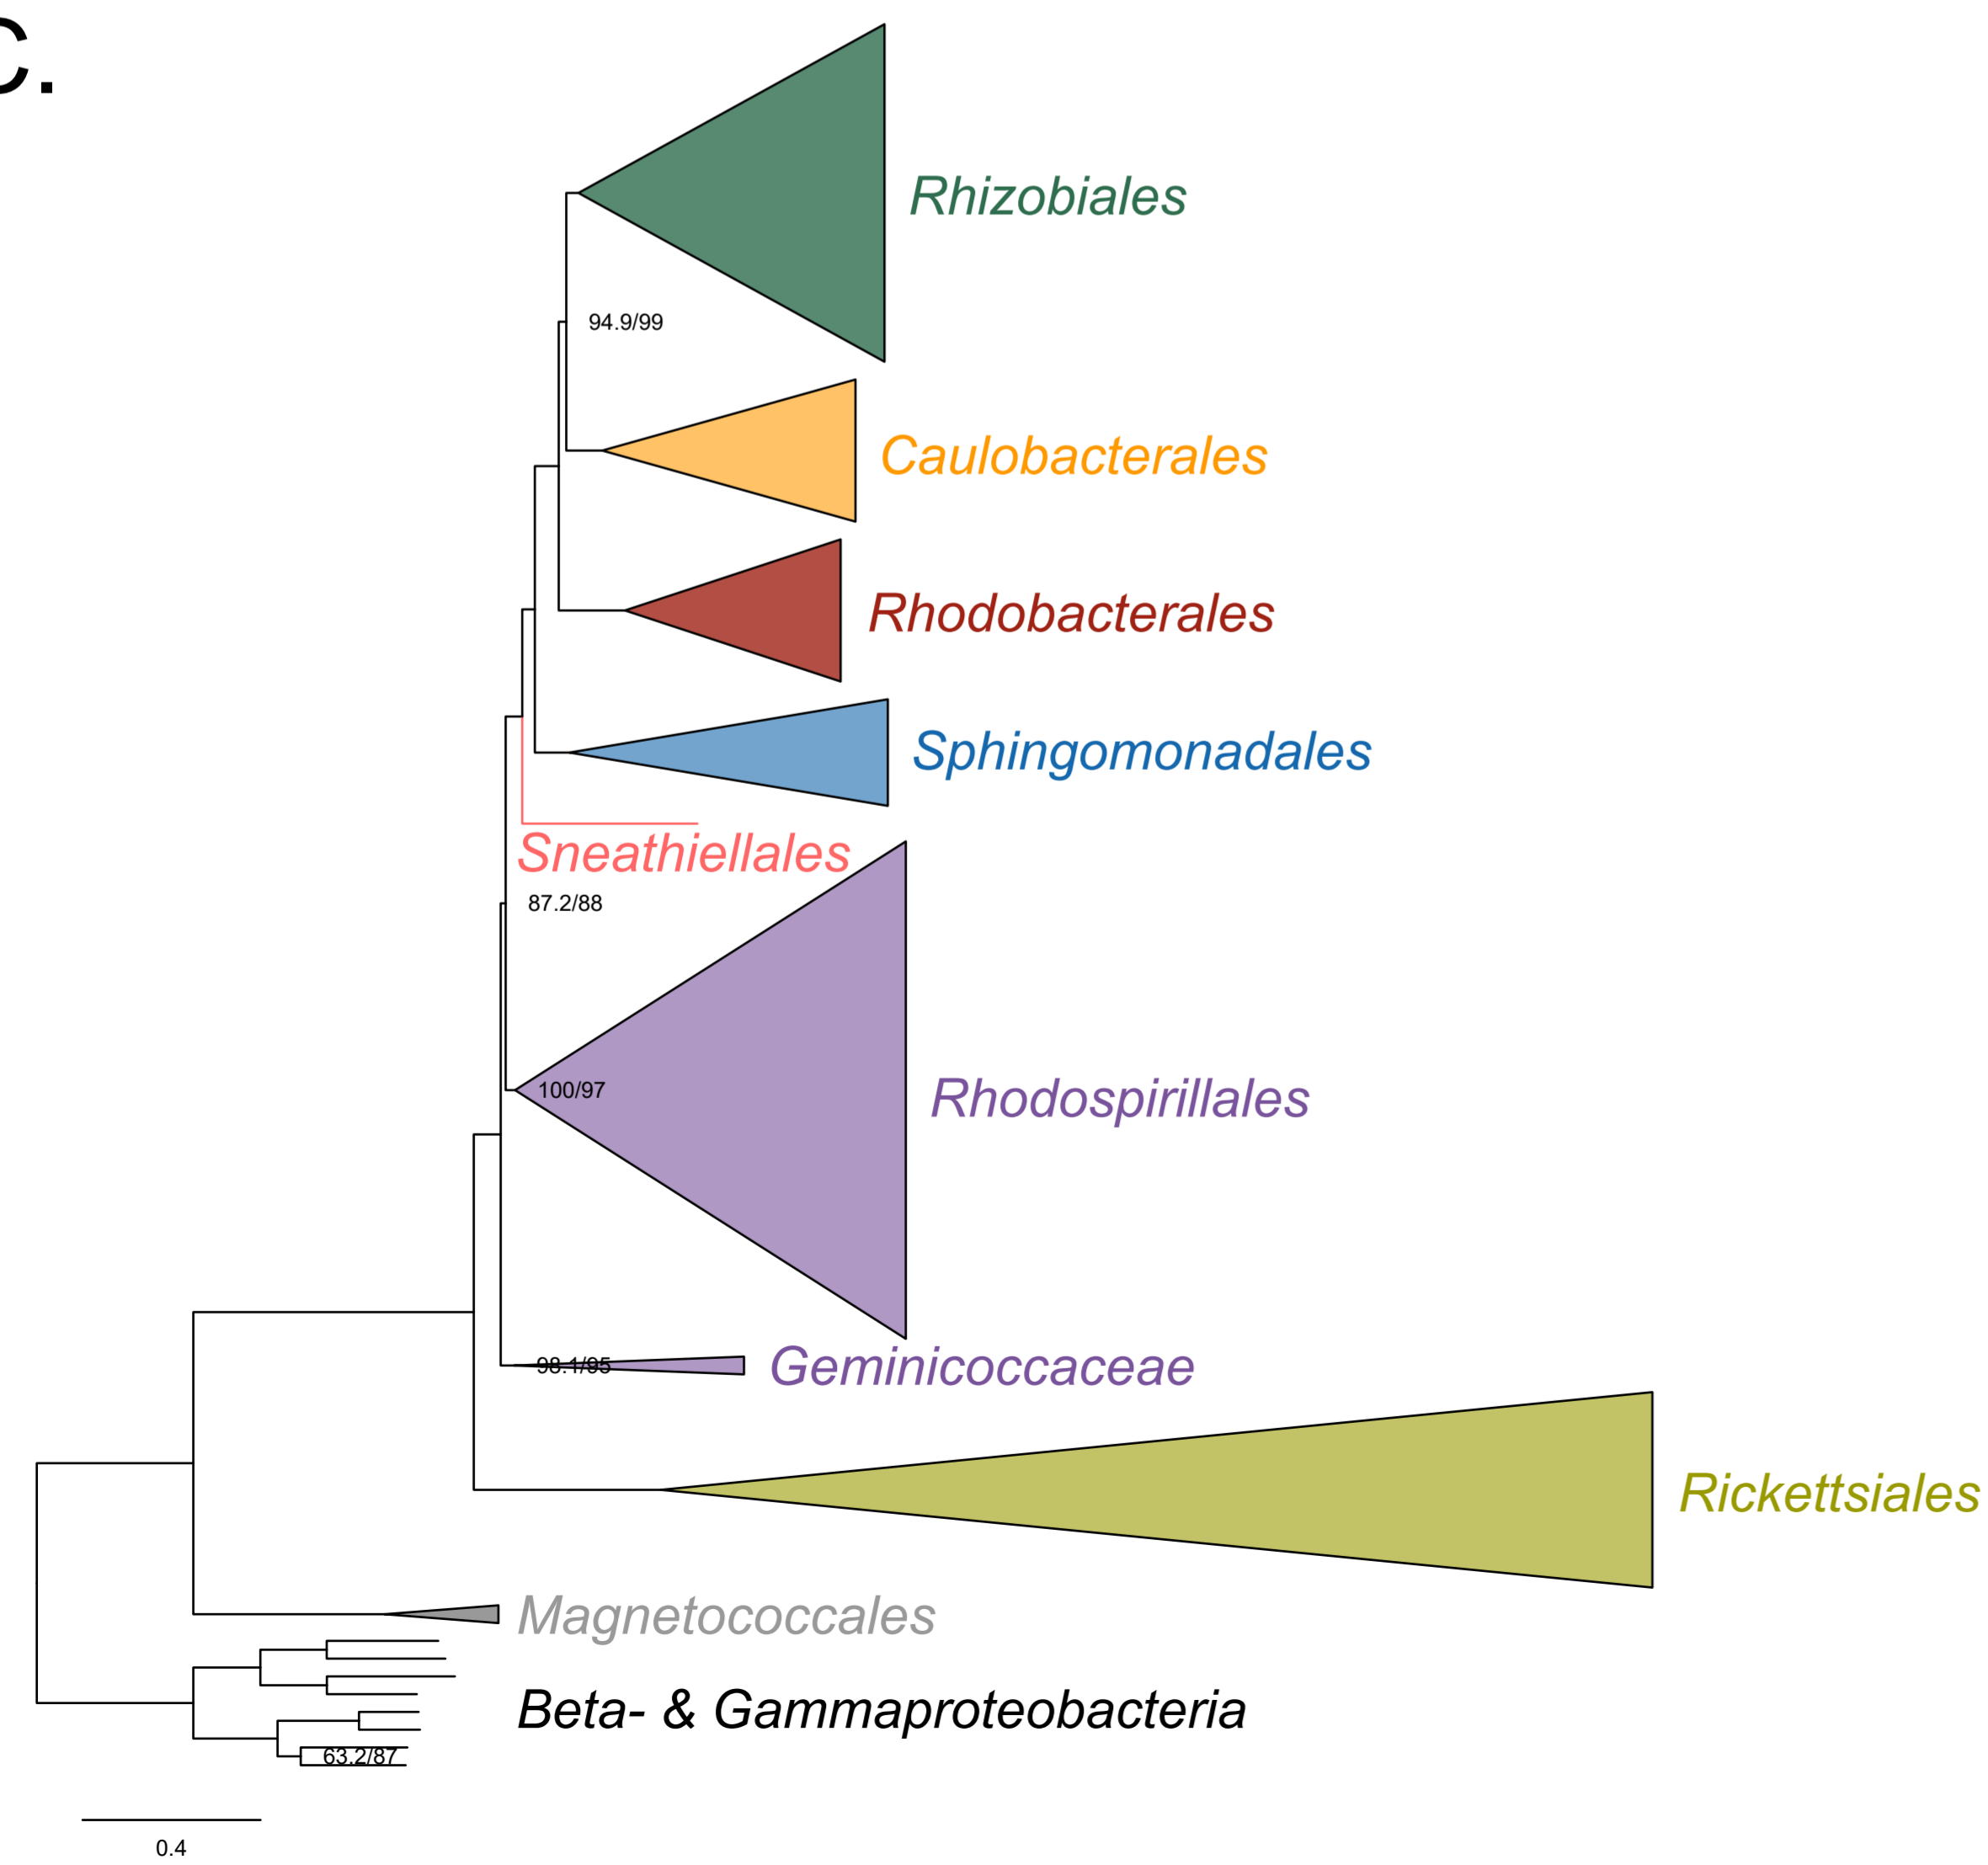

D.

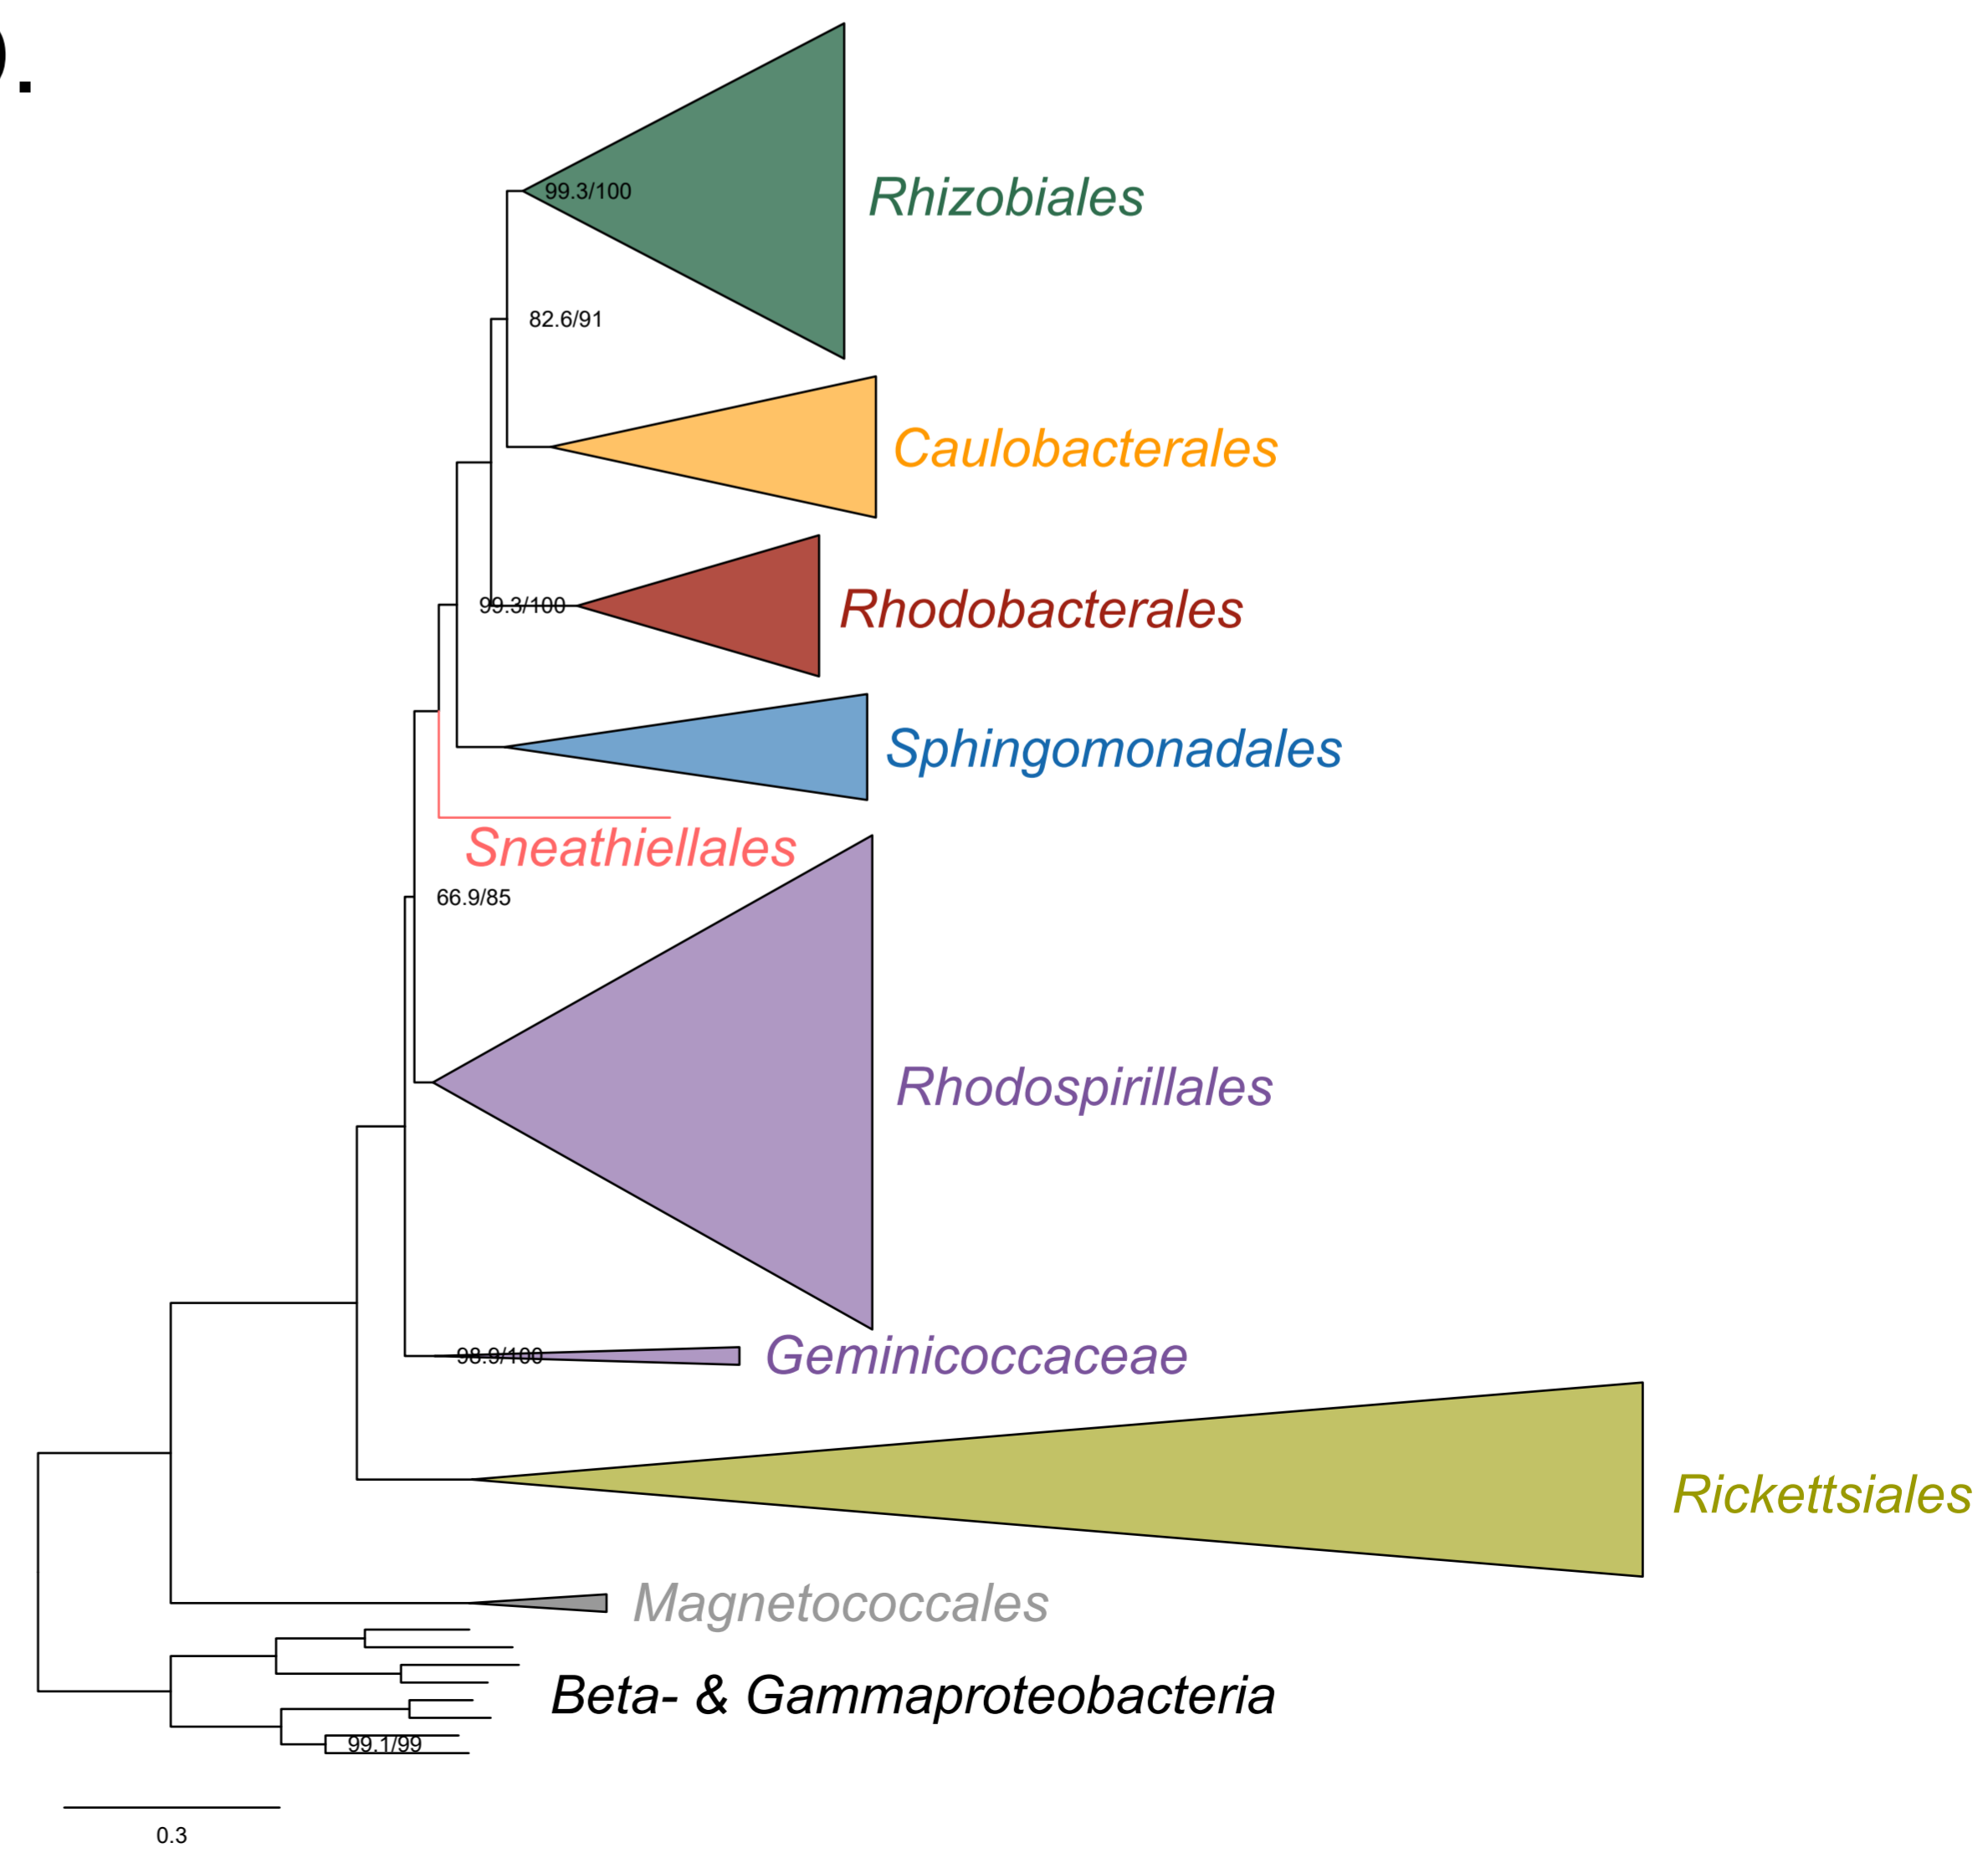

Supplement: supp [file elife-42535-supp-v2.zip › elife_poa_e42535_Figure_3_figure_supplement_2.pdf]

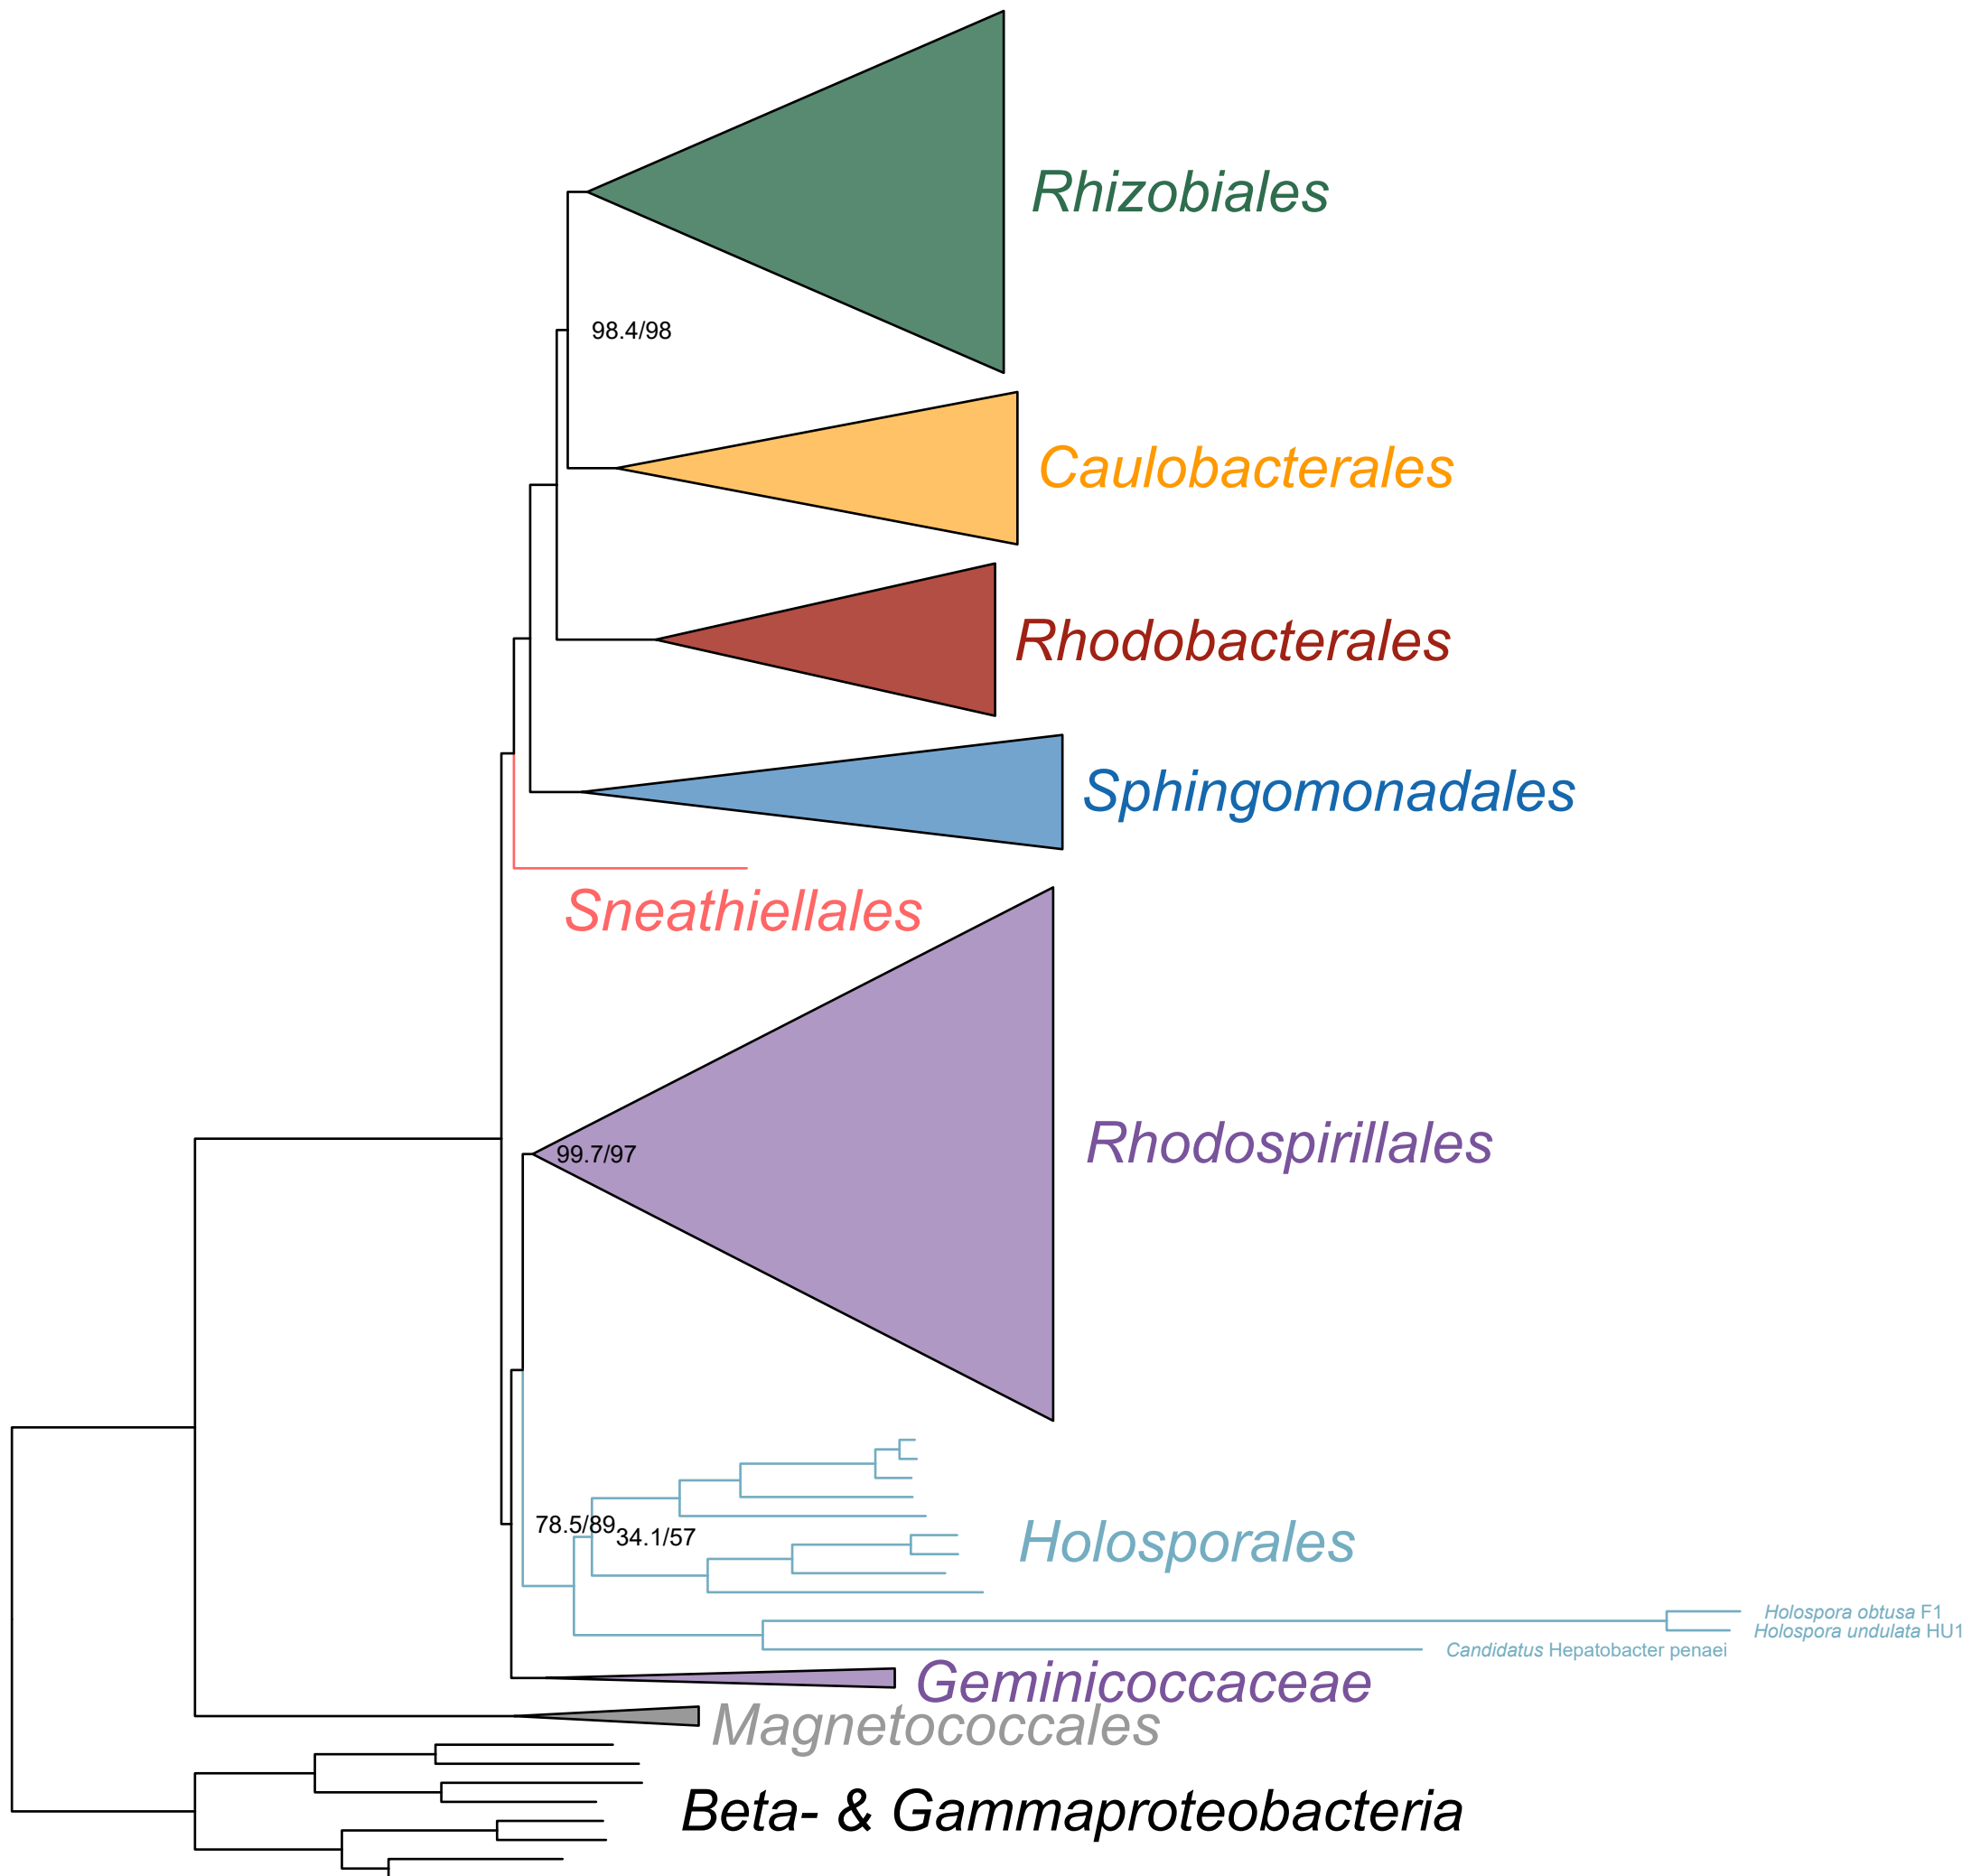

*Holospora obtusa* F1  
*Holospora undulata* HU1  
*Candidatus* Hepatobacter penaei

Supplement: supp [file elife-42535-supp-v2.zip › elife_poa_e42535_Figure_3_figure_supplement_7.pdf]

A.

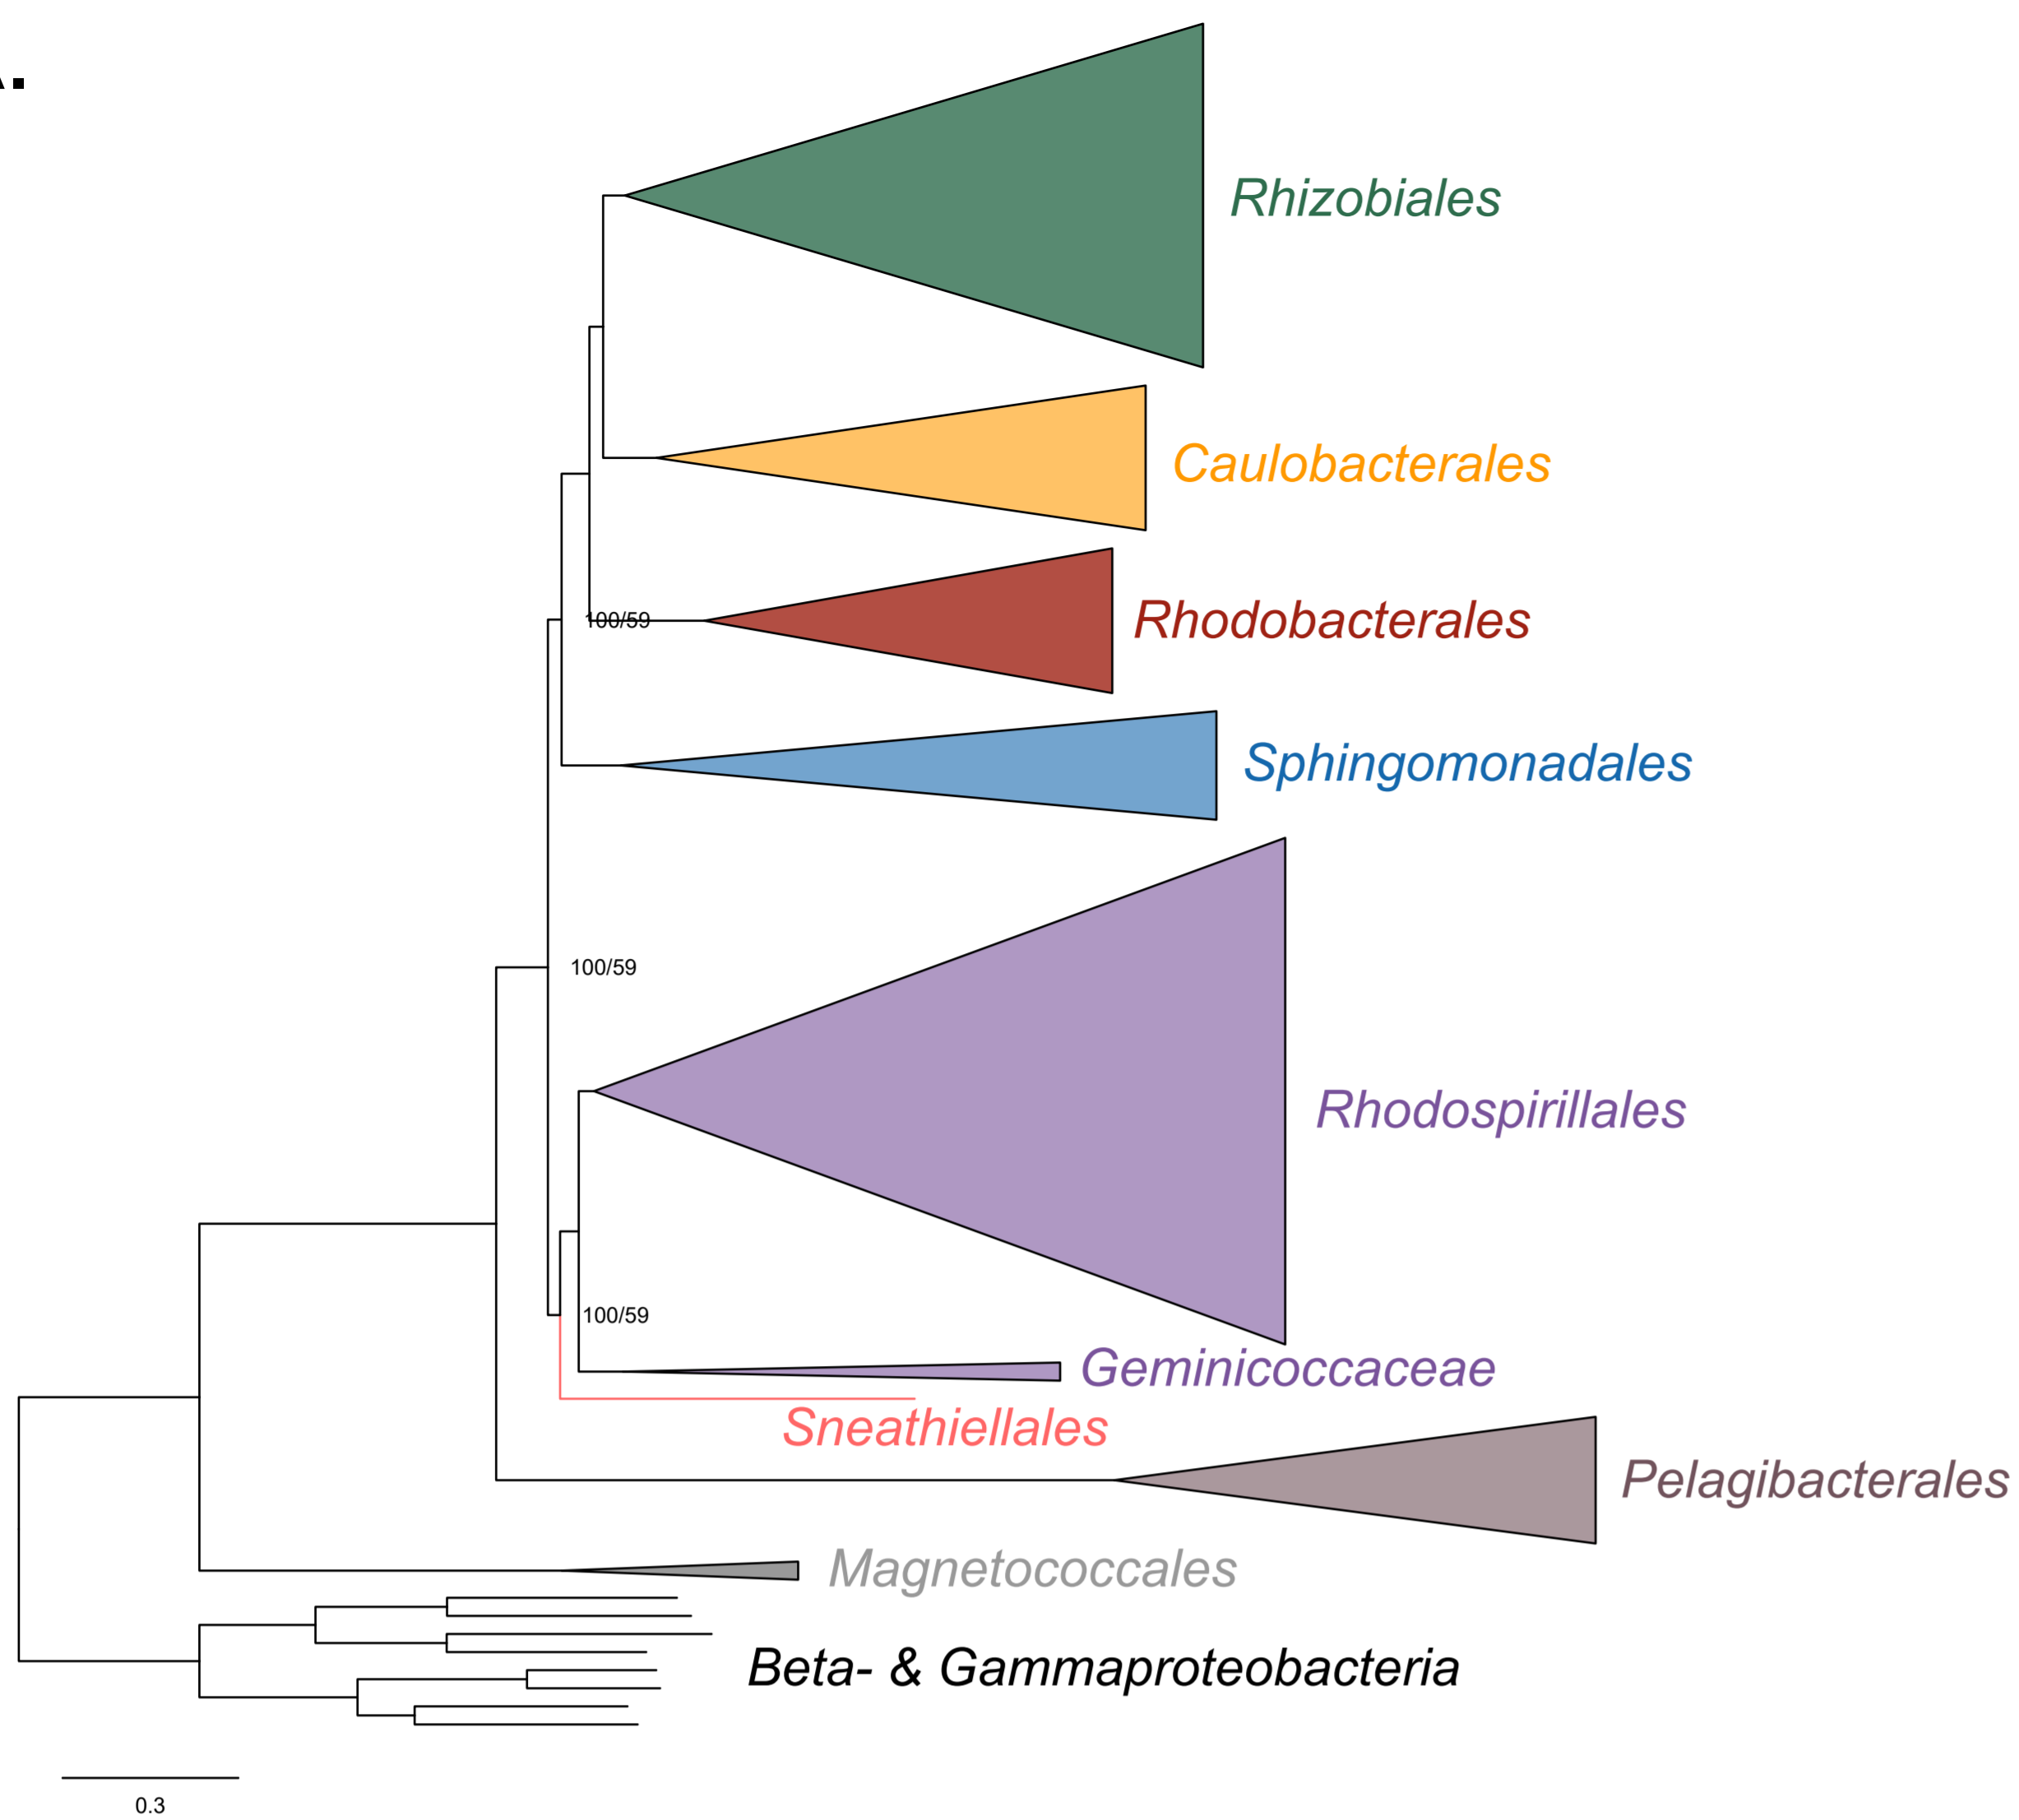

B.

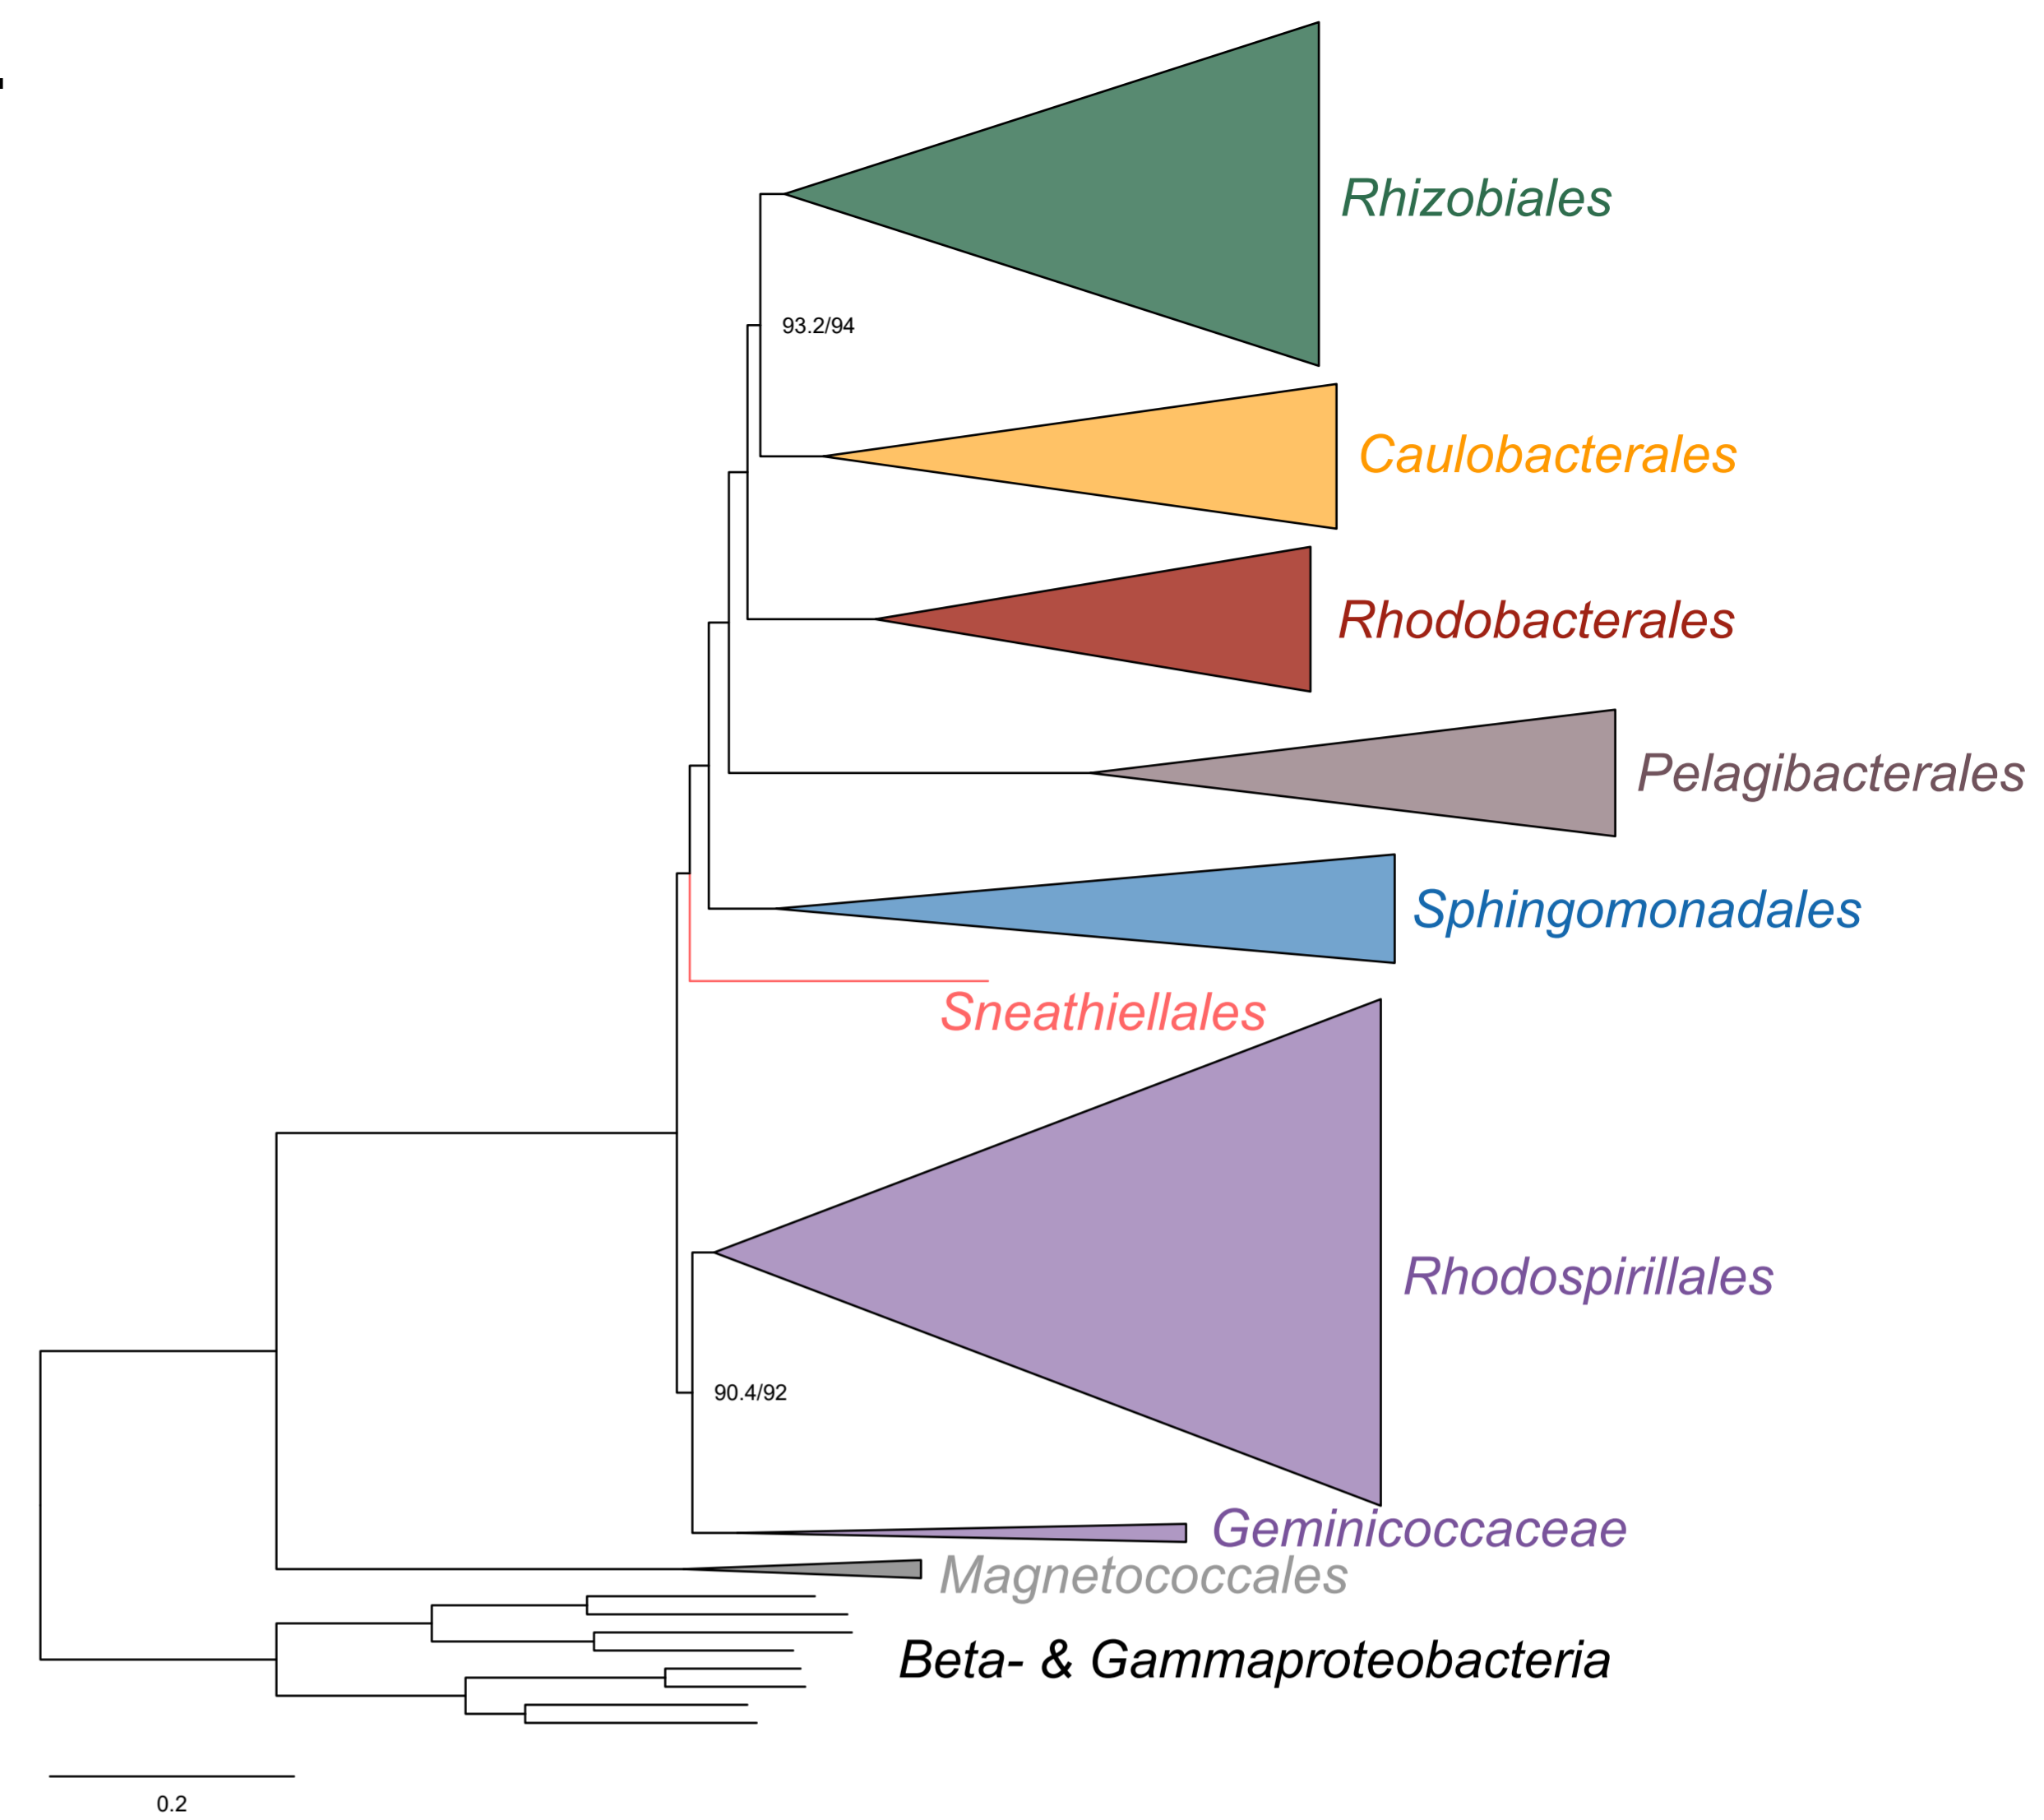

C.

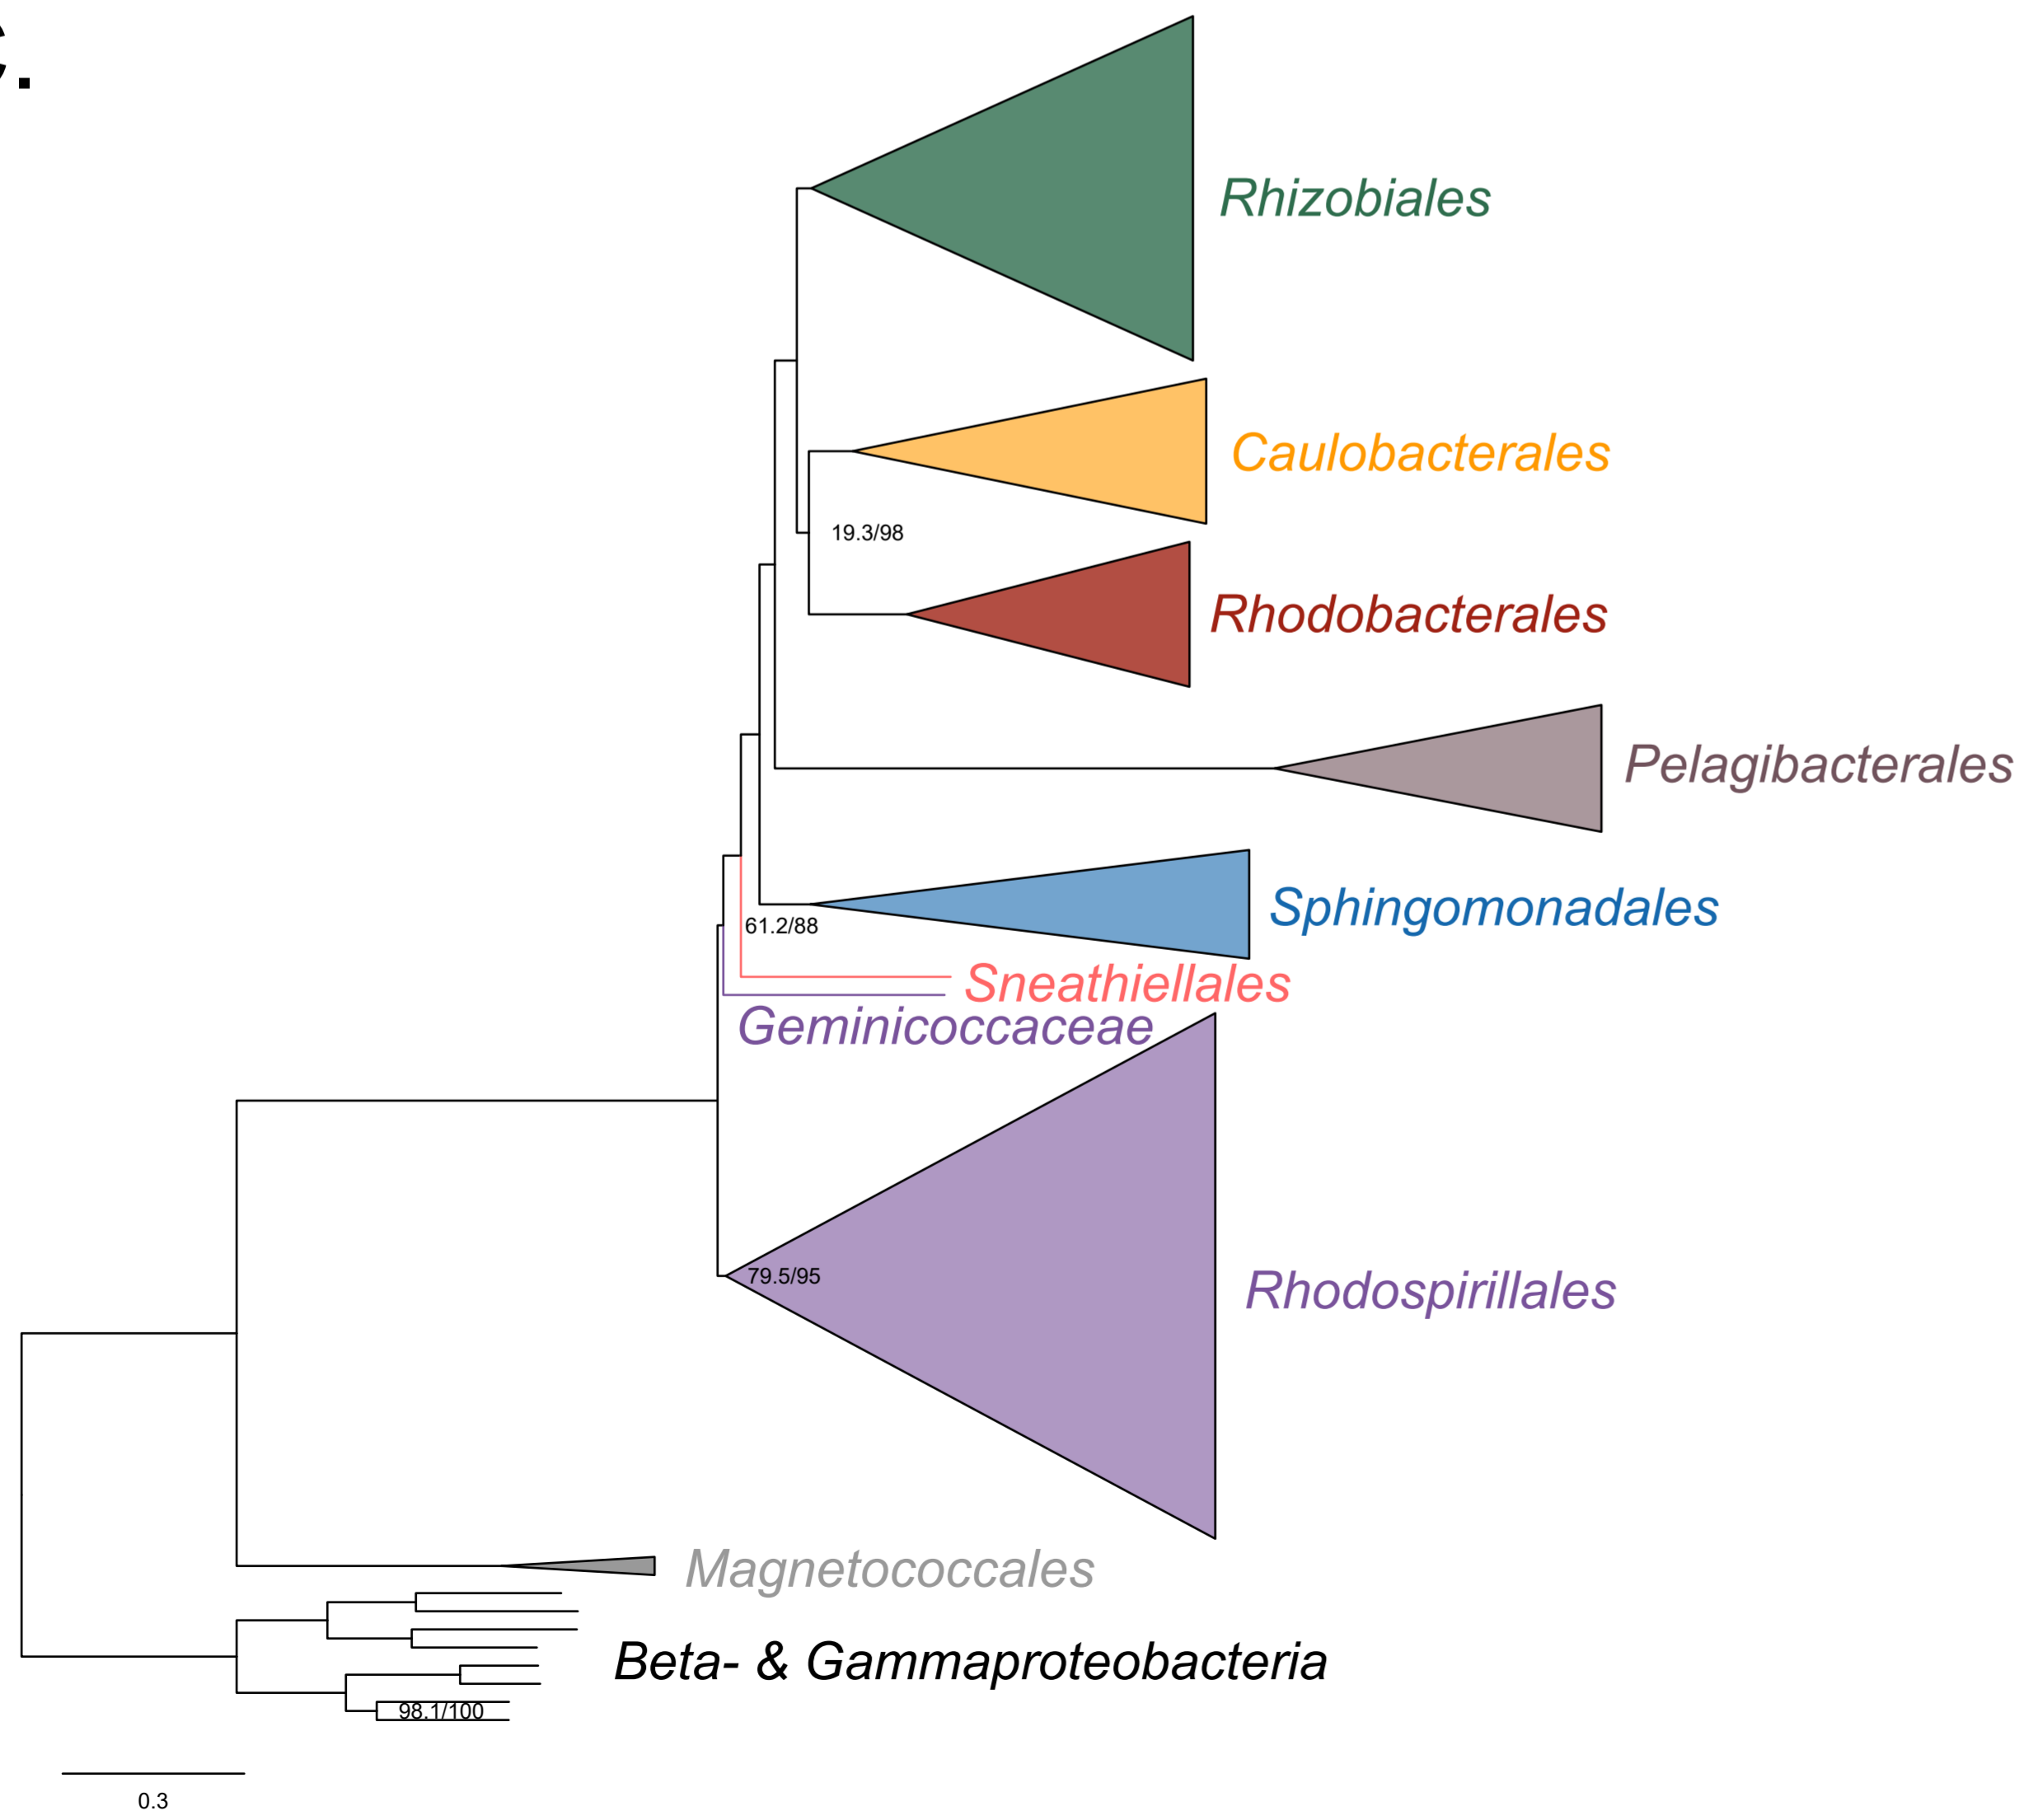

D.

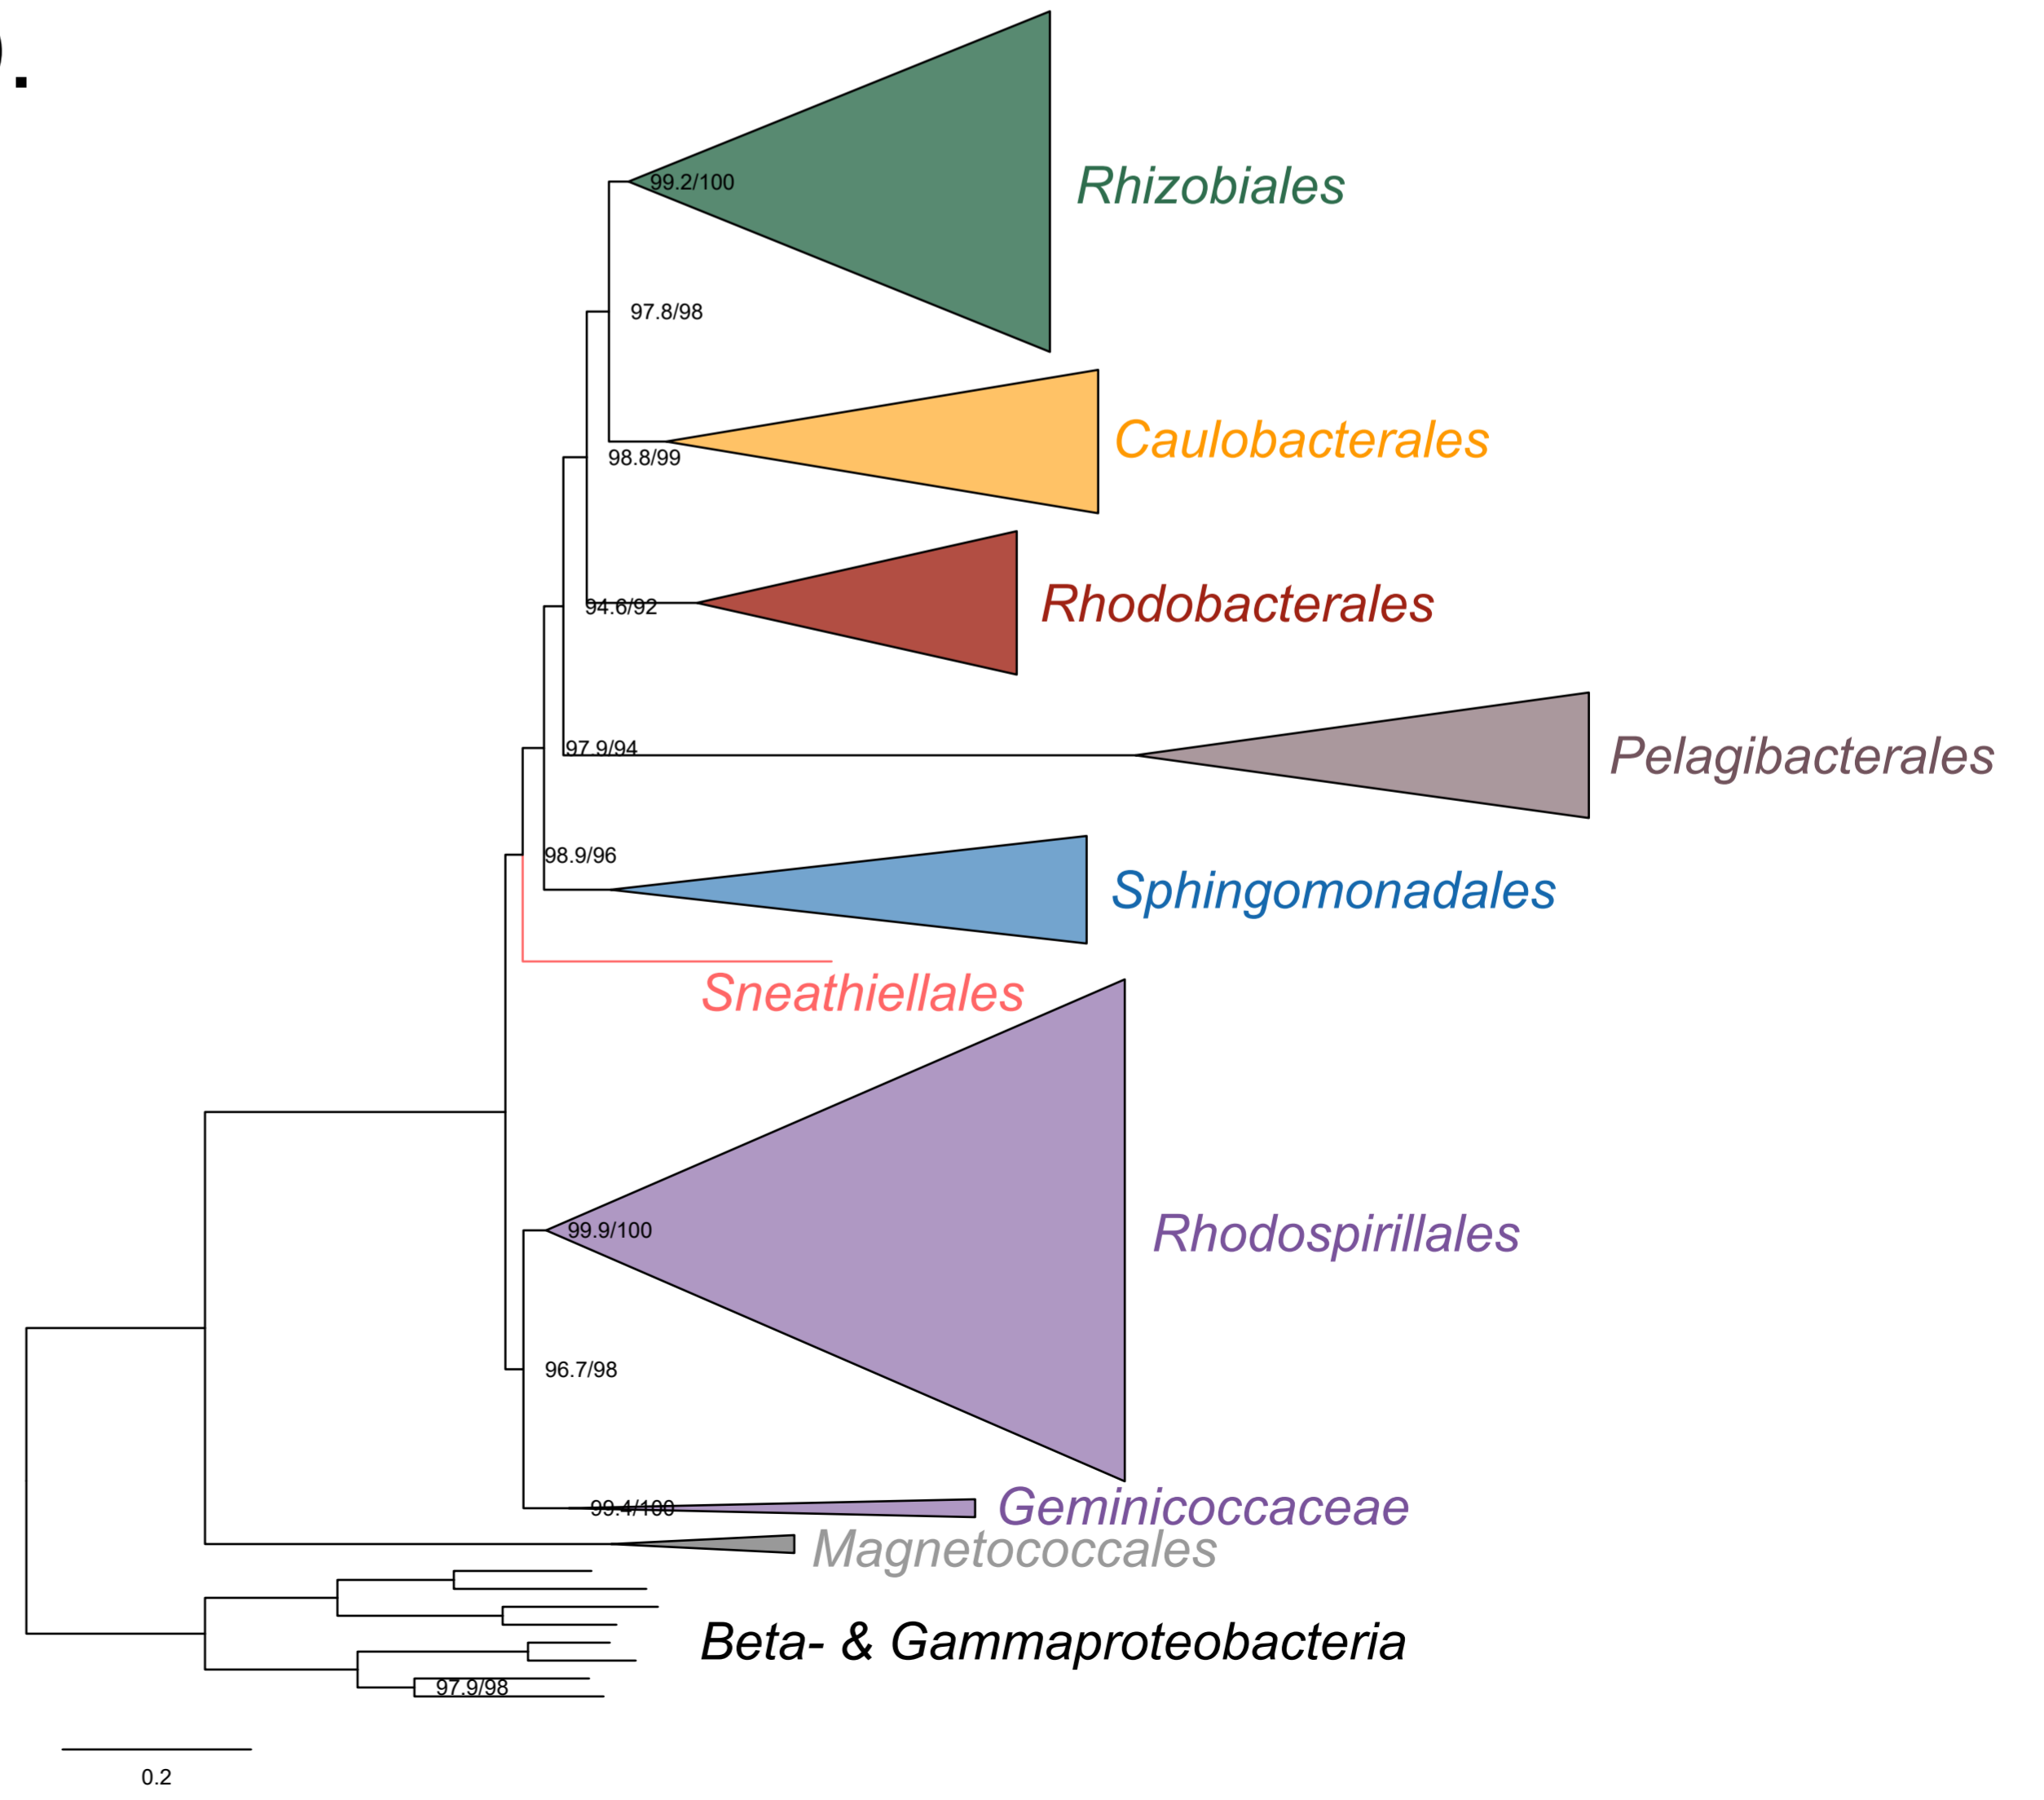

Supplement: supp [file elife-42535-supp-v2.zip › elife_poa_e42535_Figure_3_figure_supplement_4.pdf]

A.

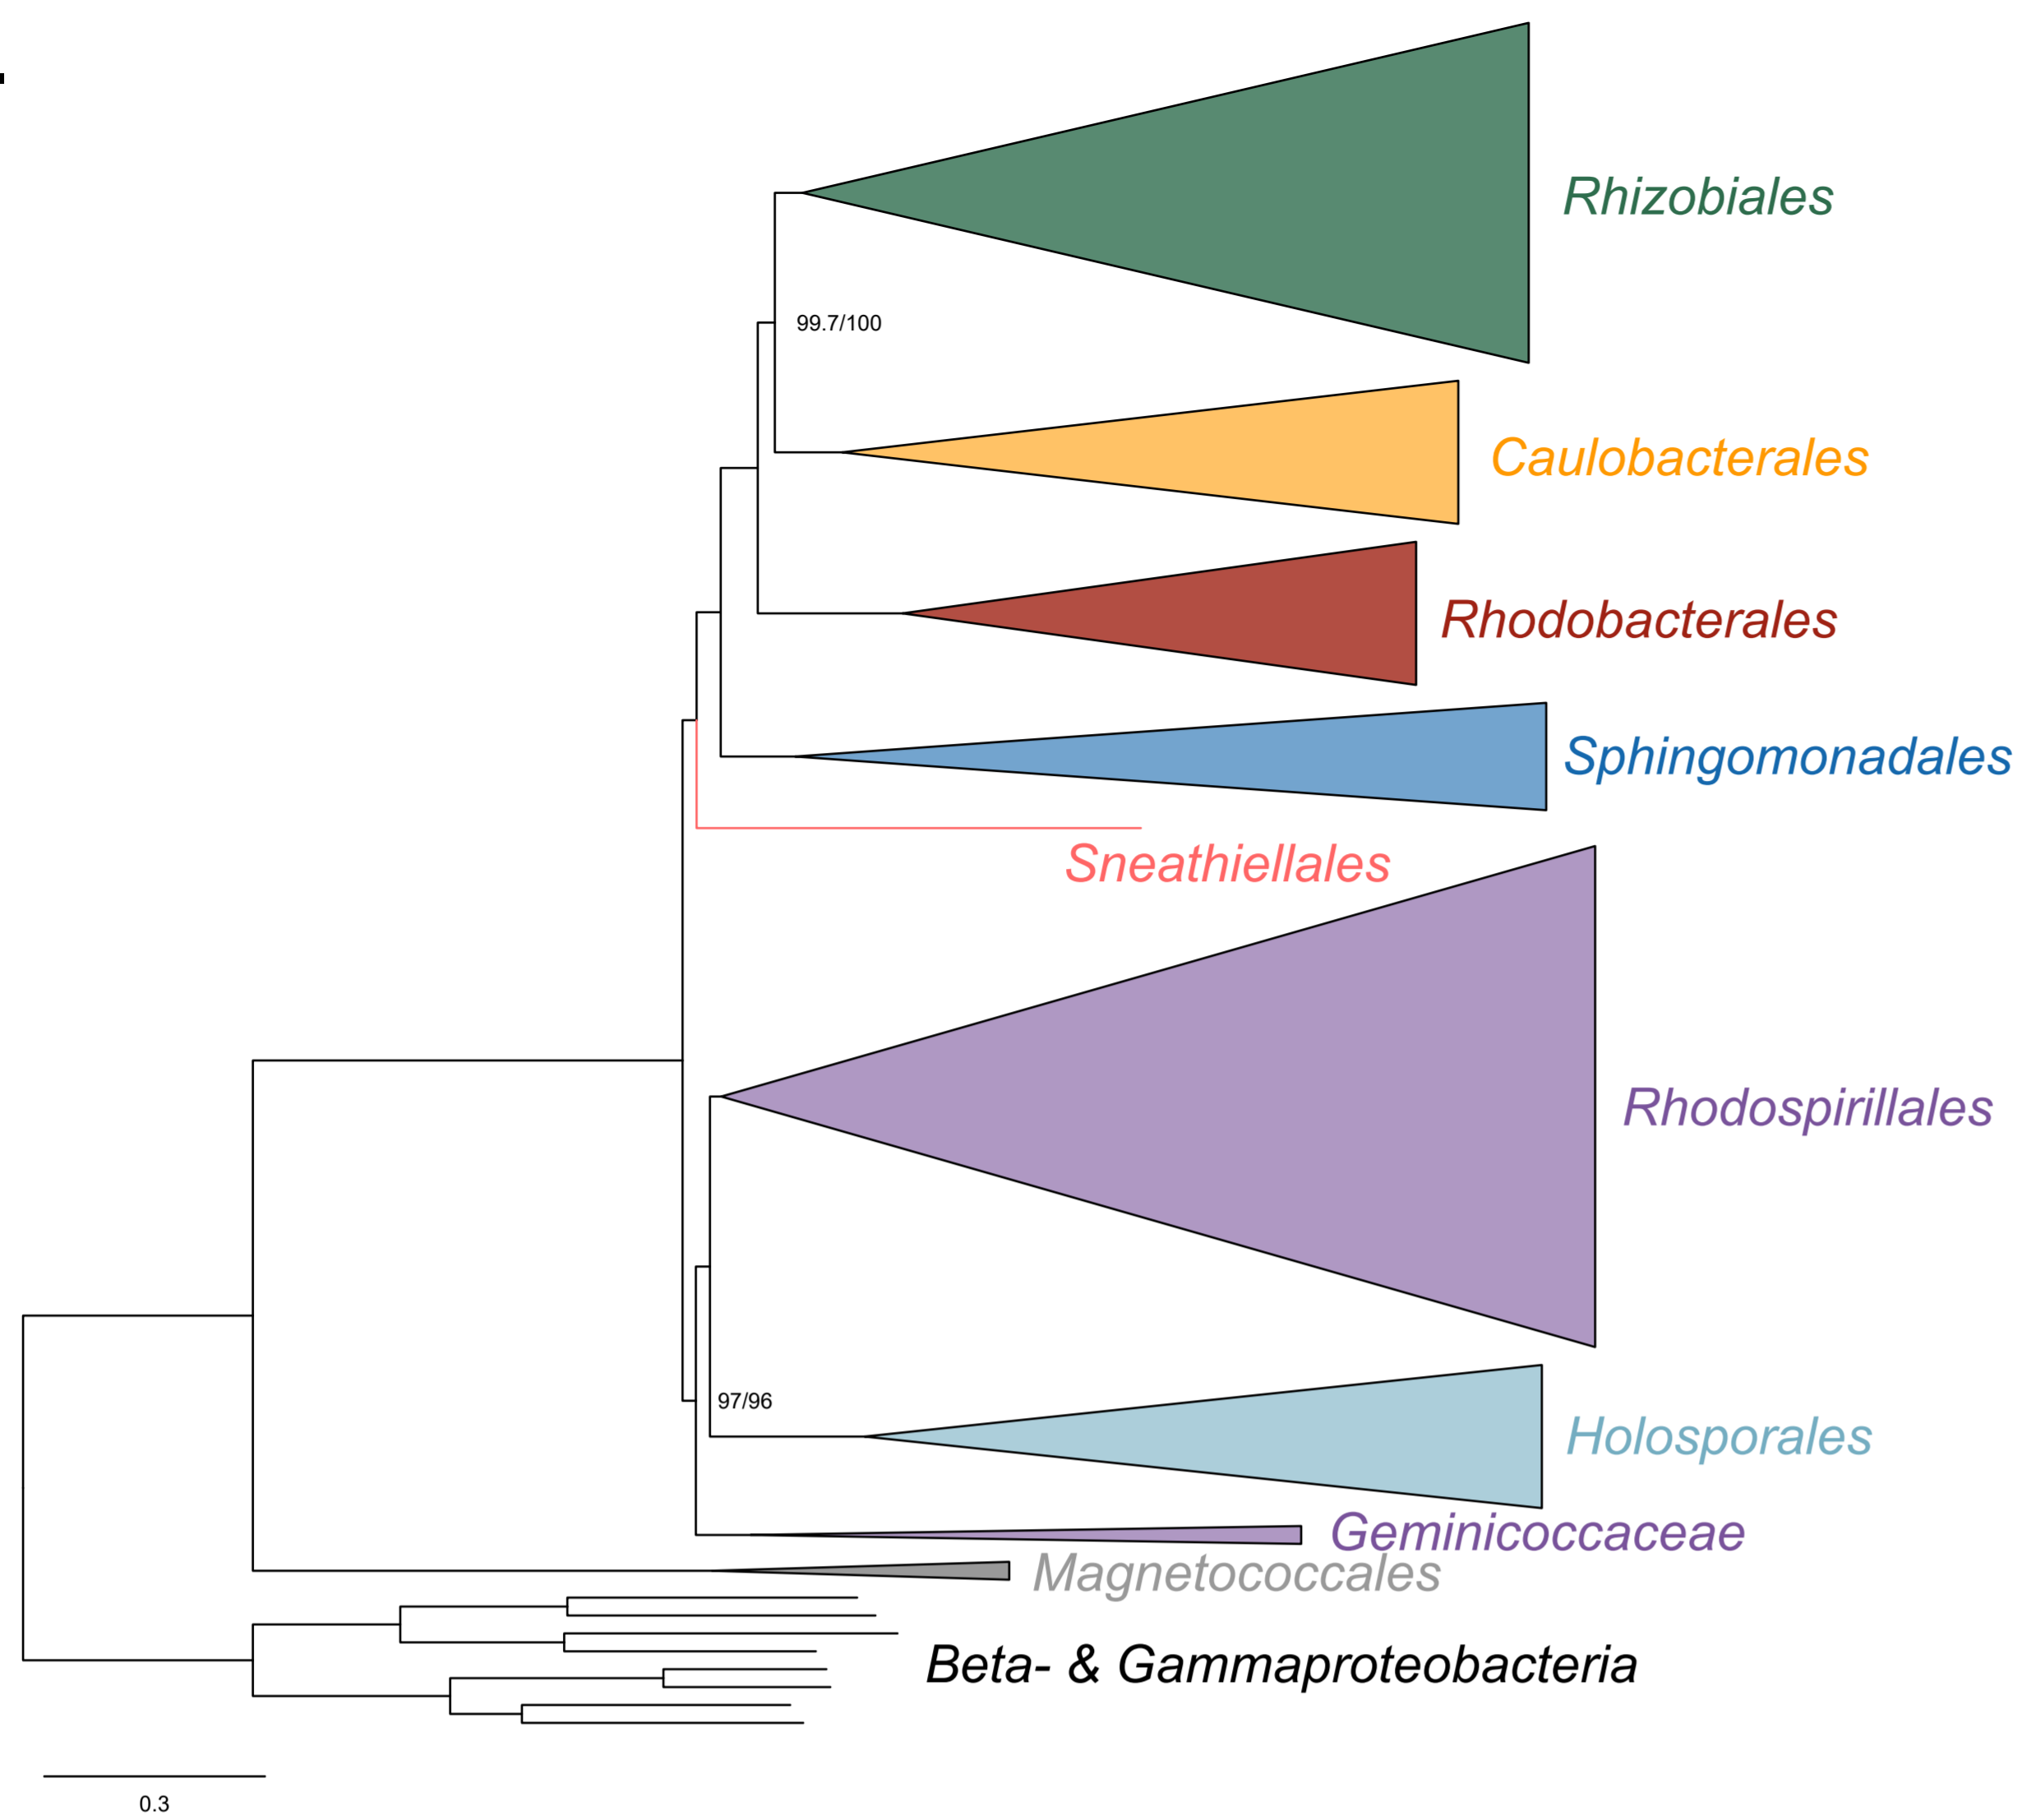

B.

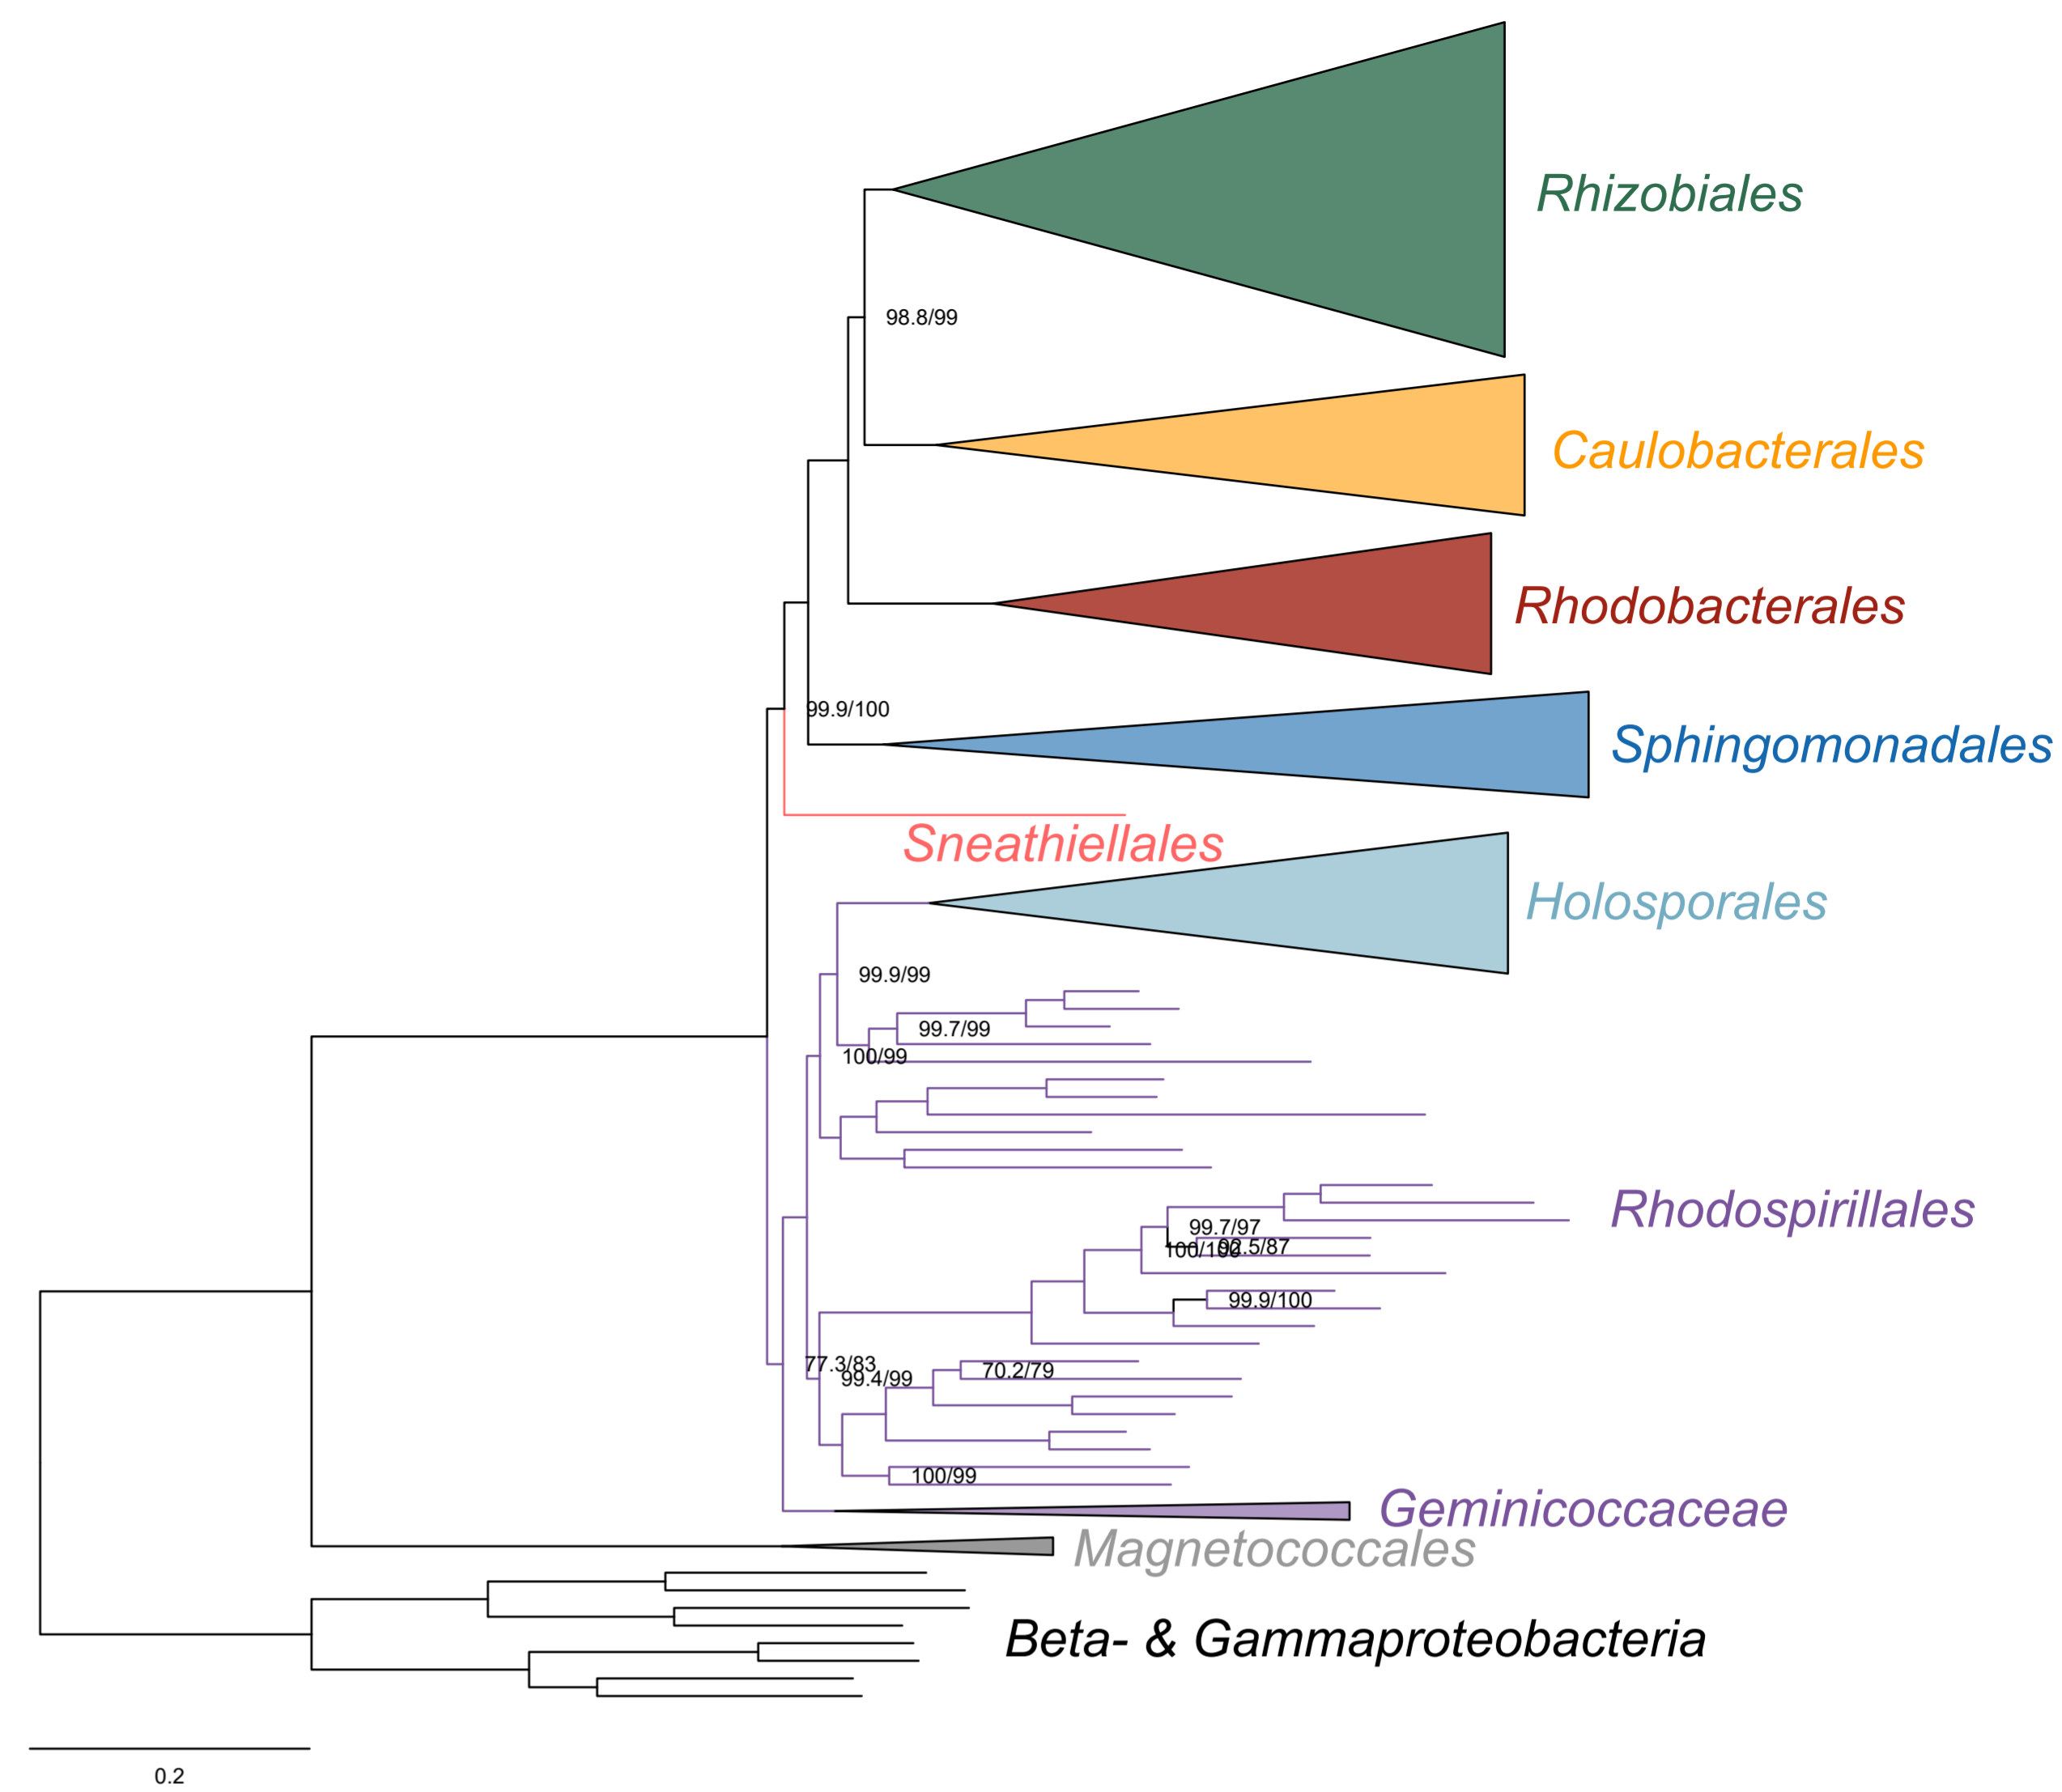

C.

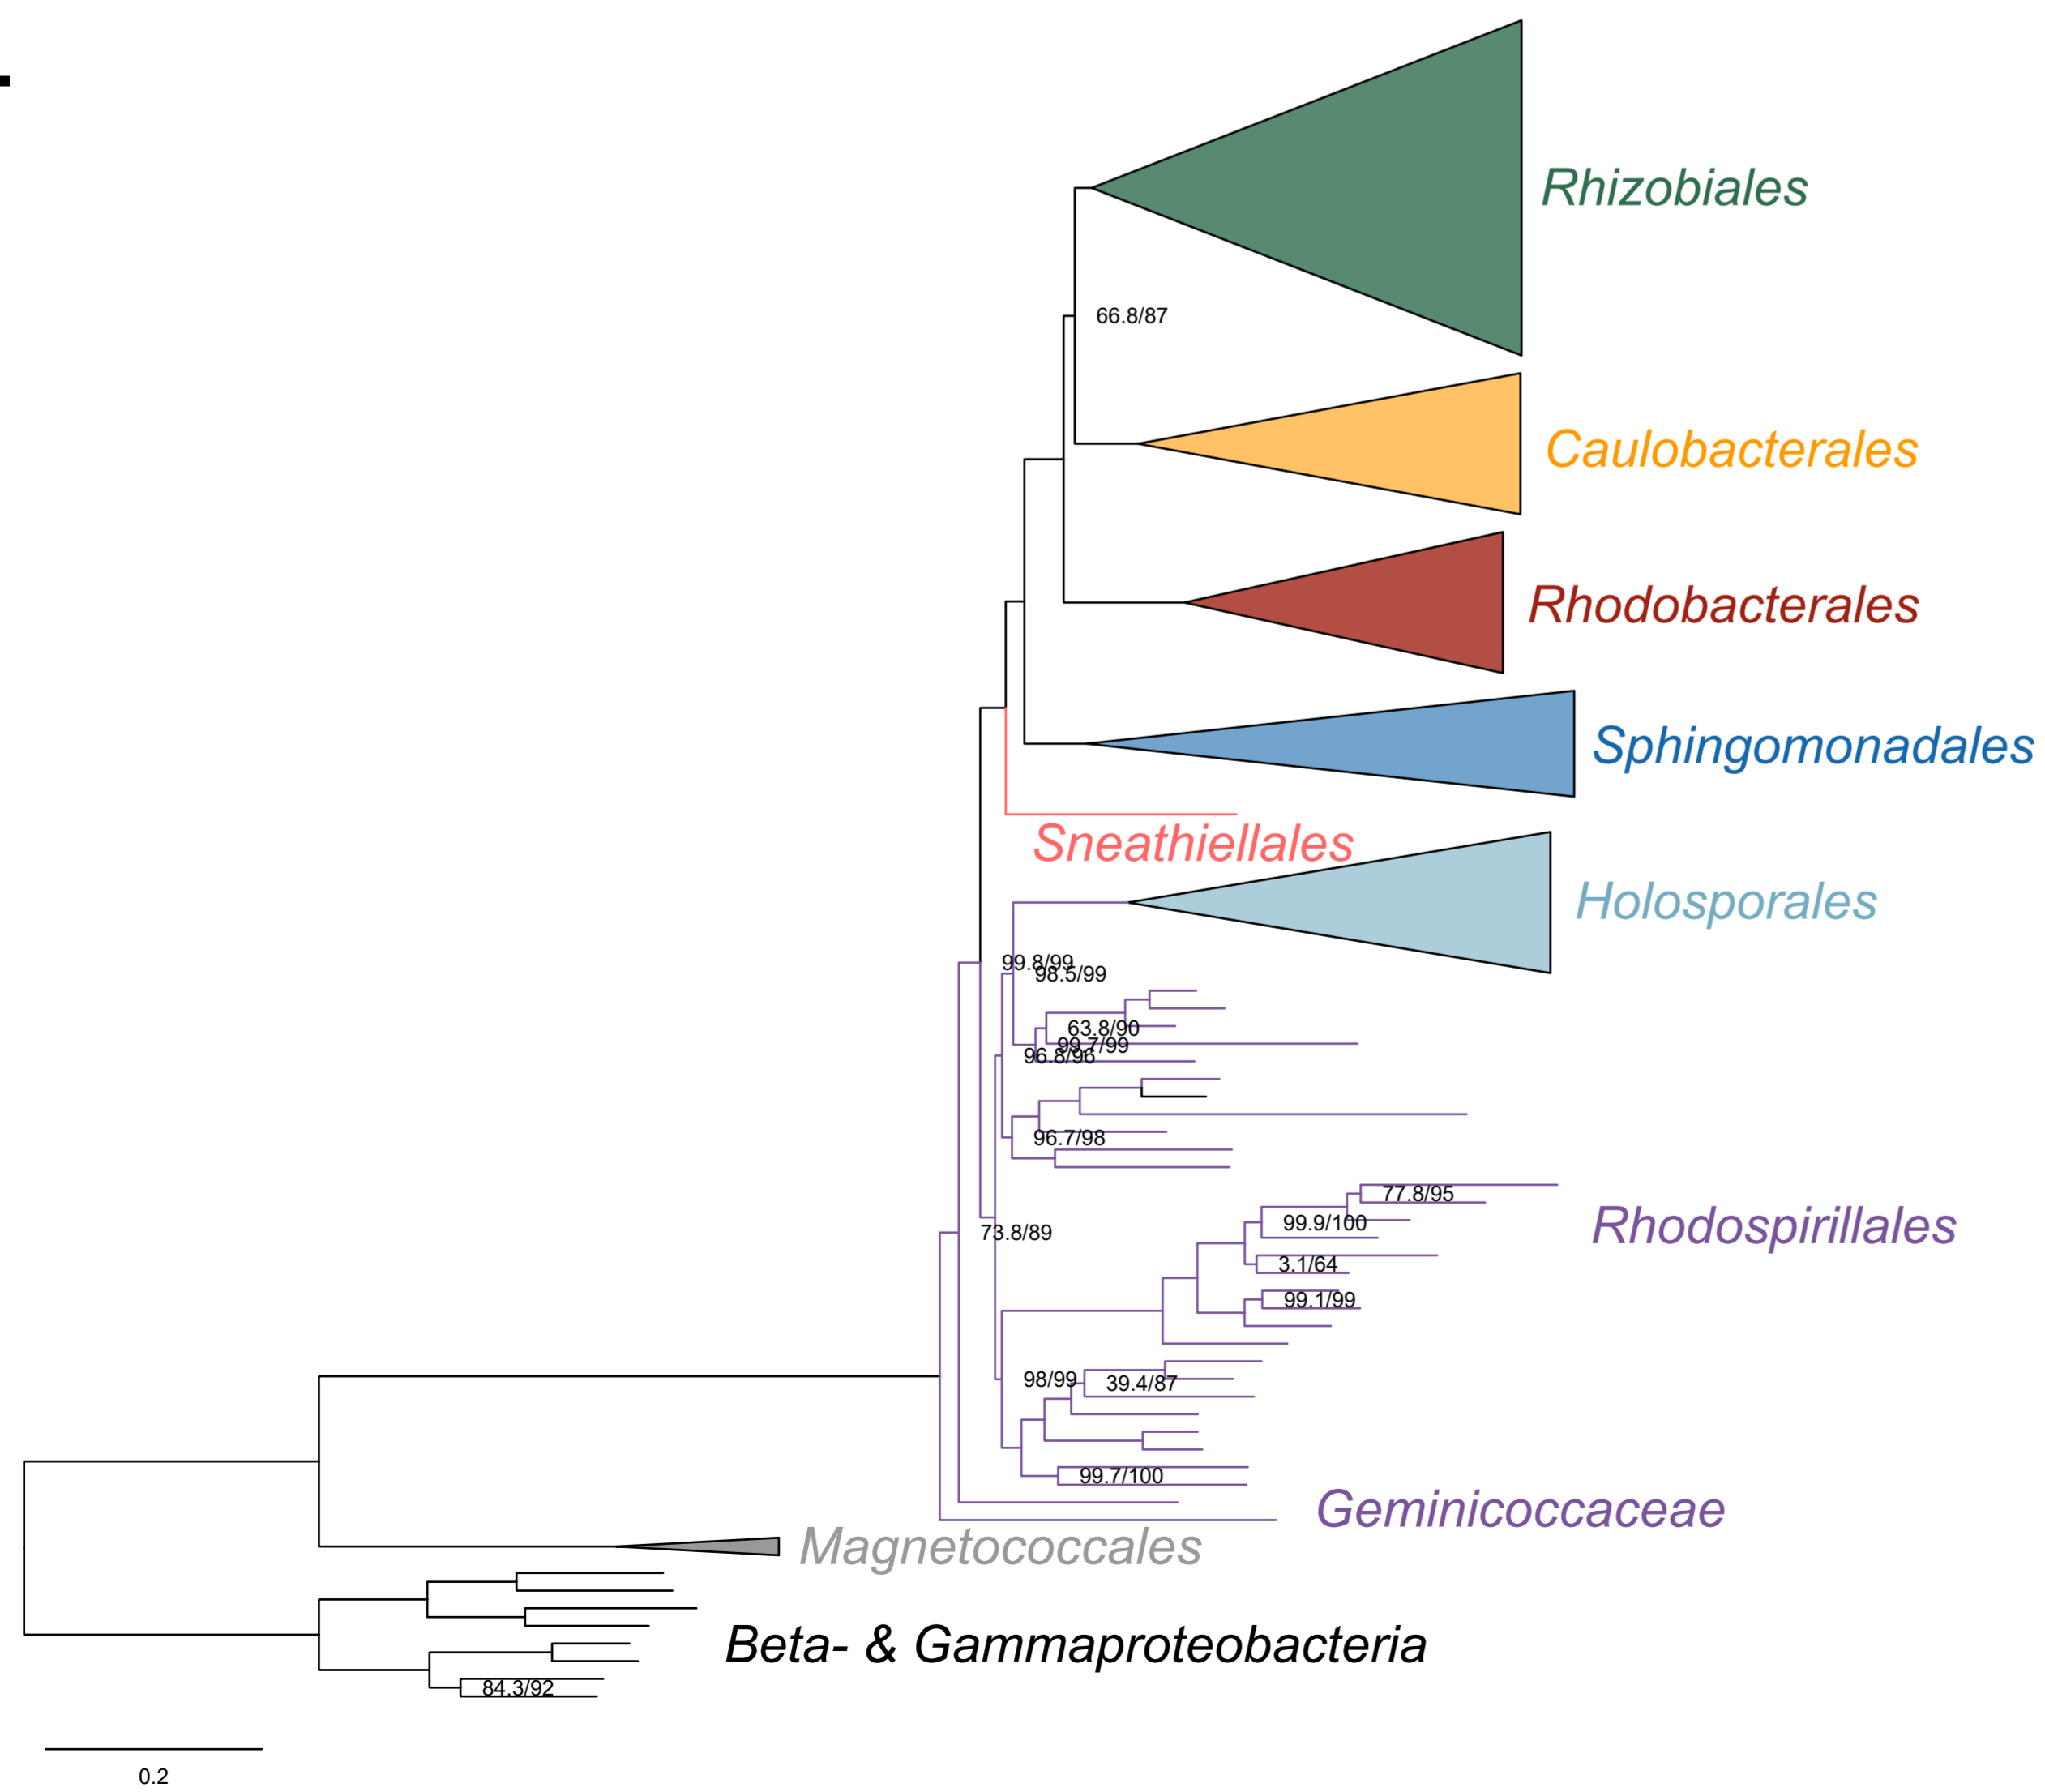

D.

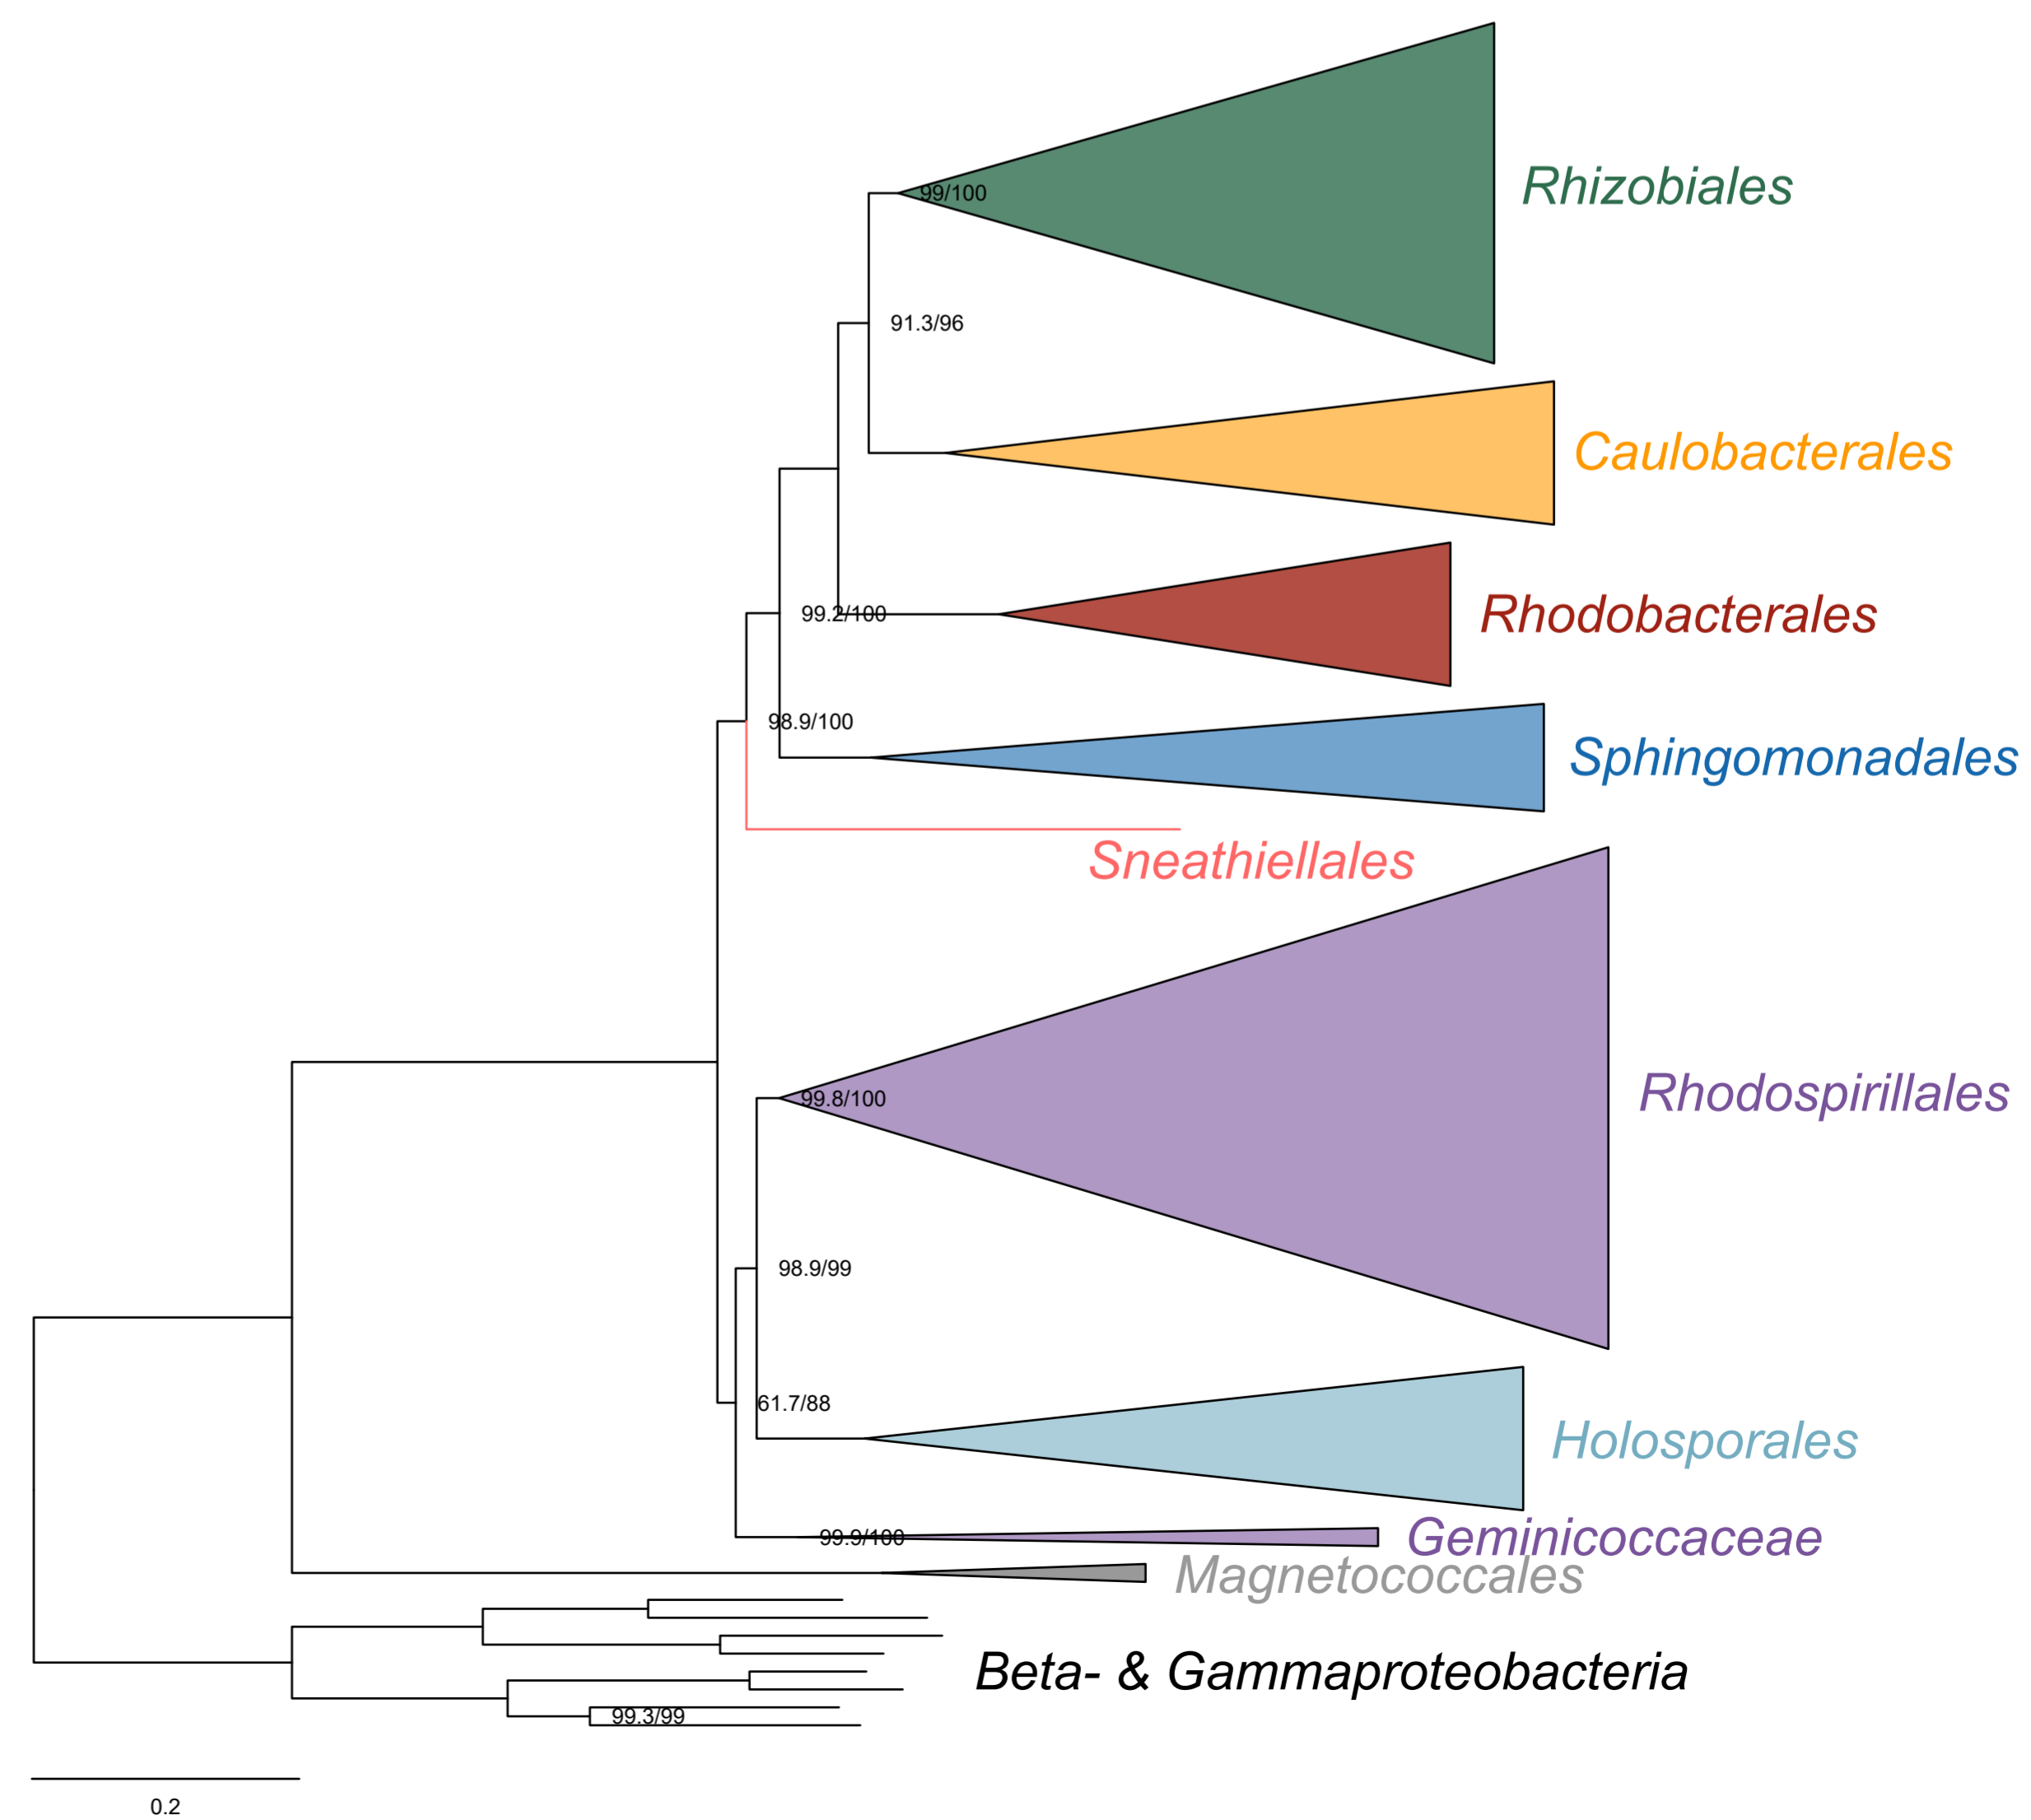

Supplement: supp [file elife-42535-supp-v2.zip › elife_poa_e42535_Figure_3_figure_supplement_1.pdf]
